# Supplementary material for: Predictive Minisci late stage functionalization with transfer learning
Source: PubMed Central journal article supplement (PMC10789750; doi:10.1038/s41467-023-42145-1), 2024-01-15
Supplement: 41467_2023_42145_MOESM1_ESM.pdf [file 41467_2023_42145_MOESM1_ESM.pdf]

# Supporting Information

Predictive Minisci Late Stage Functionalization with Transfer Learning

Emma King-Smith, Felix A. Faber, Usa Reilly, Anton V. Sinistkiy, Qingyi Yang, Bo Liu, Dennis Hyek, and Alpha A. Lee\*

Correspondence to: [aal44@cam.ac.uk](mailto:aal44@cam.ac.uk)

## Table of Contents

|                                                     |      |         |
|-----------------------------------------------------|------|---------|
| General Materials and Methods.....                  | page | S4      |
| Table S1: Reagents Used for Each Reaction Type..... | page | S7      |
| Table S2: Dataset Breakdown.....                    | page | S7      |
| Calculating the Fukui Indices.....                  | page | S8      |
| Tie Breakers for F-scores.....                      | page | S9      |
| Equations.....                                      | page | S10     |
| Figure S1.....                                      | page | S11     |
| Figure S2.....                                      | page | S12     |
| Figure S3.....                                      | page | S13     |
| Figure S4.....                                      | page | S14     |
| Figure S5.....                                      | page | S15     |
| Figure S6.....                                      | page | S16     |
| Compound Characterizations.....                     | page | S17-S26 |
| Figure S7.....                                      | page | S27     |
| Figure S8.....                                      | page | S28     |
| Figure S9.....                                      | page | S29     |
| Figure S10.....                                     | page | S30     |
| Figure S11.....                                     | page | S31     |
| Figure S12.....                                     | page | S32     |
| Figure S13.....                                     | page | S33     |
| Figure S14.....                                     | page | S34     |
| Figure S15.....                                     | page | S35     |
| Figure S16.....                                     | page | S36     |
| Figure S17.....                                     | page | S37     |
| Figure S18.....                                     | page | S38     |
| Figure S19.....                                     | page | S39     |
| Figure S20.....                                     | page | S40     |
| Figure S21.....                                     | page | S41     |
| Figure S22.....                                     | page | S42     |
| Figure S23.....                                     | page | S43     |
| Figure S24.....                                     | page | S44     |
| Figure S25.....                                     | page | S45     |
| Figure S26.....                                     | page | S46     |
| Figure S27.....                                     | page | S47     |
| Figure S28.....                                     | page | S48     |
| Figure S29.....                                     | page | S49     |
| Figure S30.....                                     | page | S50     |
| Figure S31.....                                     | page | S51     |
| Figure S32.....                                     | page | S52     |
| Figure S33.....                                     | page | S53     |
| Figure S34.....                                     | page | S54     |
| Figure S35.....                                     | page | S55     |
| Figure S36.....                                     | page | S56     |
| Figure S37.....                                     | page | S57     |



## ***General Materials and Methods:<sup>1</sup>***

Unless otherwise noted, all chemicals and reagents for chemical reactions were purchased at the highest commercial quality and used without further purification. Liver microsomes were purchased from the following vendors: female mouse, male rat, male cynomolgus monkey and non-transfected microsomes (Corning, Woburn, MA); dexamethasone- induced male rat, male hamster, male dog and pooled male & female human (prepared in-house at Pfizer, Groton, CT); and male guinea pig and male rabbit (Xenotech, Lenexa, KS). Note, human and monkey liver microsomes are considered biohazardous materials and appropriate precautions should be taken during handling and disposal. Recombinant human P450 enzymes heterologously expressed in microsomes from Sf9 cells were custom prepared by Panvera (Madison, WI).

### Code:

The pipeline, modules, and trained models can be found at [https://github.com/emmaking-smith/SET\\_LSF\\_CODE](https://github.com/emmaking-smith/SET_LSF_CODE).

### Liver Microsomes and Recombinant CYP Enzyme Screen Procedure:

Loratadine (20.0  $\mu$ M, 10.0 nmol) was incubated with 9 mammalian liver microsomes (2.0 mg/mL) and 9 human recombinant P450 enzymes (2.0 mg/mL). The total volume in each well was 0.5 mL which contained potassium phosphate buffer (0.1 M, pH 7.4), MgCl<sub>2</sub> (3.3 mM, 1.65  $\mu$ mol) and acetonitrile (0.4% v/v). The reaction was initiated with the addition of NADPH (1.3 mM, 0.65  $\mu$ mol) and agitated at 37 °C in a reciprocal shaking bath at 1" throw for 1 hour. The incubation was quenched with the addition of acetonitrile (1.5 mL), followed by centrifugation (1700 g, 5 min). The supernatant was removed and the solvent reduced using a Genevac centrifuge evaporator. The residue was reconstituted in 0.1 mL of 1% formic acid in H<sub>2</sub>O / 20% acetonitrile, followed by centrifugation (1700 g, 5 min). The samples were analyzed using the General HPLC-MS Method for Screen Analysis.

### Biomimetic Metalloporphyrin Oxidation (BMO) Screen Procedure:

A high throughput BMO screen was completed on a miniature scale, examining the key variables of metalloporphyrin, oxidant and solvent. Nine different metalloporphyrins plus control without metalloporphyrin, six oxidants and two solvents were screened in a matrix of 120 combinations. The remaining variables were held constant according to the standard protocol described below.

The reactions were set-up in two 96-well arrays using miniature 8 x 20 mm (0.2 mL) glass vials under standard glove box conditions (H<sub>2</sub>O and O<sub>2</sub> <20 ppm). A 8 x 20 mm (0.2 mL) glass vial equipped with stir bar was dispensed the reaction solvent (100  $\mu$ L, 4.0 mM) followed by a solution of 1 (5.0  $\mu$ L, 0.4  $\mu$ mol), added as a 0.1 M solution in dichloroethane. Stirring was initiated before the metalloporphyrin (4.0  $\mu$ L, 0.04  $\mu$ mol) was charged, as a 10.0 mM solution in dichloroethane. The vial was treated with a 0.1 M solution of imidazole (2.4 mL, 0.24  $\mu$ mol) in H<sub>2</sub>O, followed by a 0.4 M solution of formic acid (4.0  $\mu$ L, 0.16  $\mu$ mol) in H<sub>2</sub>O. Finally, the oxidant (8.0  $\mu$ L, 0.08  $\mu$ mol) was added as a 0.1 M solution in dichloroethane. The reaction vial was crimp sealed with a PTFE / Silicone / PTFE septa to the glove box environment before the

reaction was left to stir at 25 °C for 18 hours. After this time period, the reaction was diluted with acetonitrile (0.2 mL) and analyzed directly by UPLC/MS. The UPLC/MS method used a 0.1% AcOH / NH<sub>4</sub>CO<sub>2</sub>H / H<sub>2</sub>O gradient over 0.8 minutes, running from 5-95% acetonitrile using a Waters Acquity UPLC BEH C18 30 x 2.1 mm column at 100 °C with a flow rate of 2.5 mL/min and a detection wavelength of 210-360 nm. 0.5 µL injections were made directly from diluted reaction mixtures and ionization monitored in positive mode.

#### General Minisci Functionalization with Baran Diversinates™ Procedure:

To 1-dram pressure release vial containing Diversinate™ sulfinate reagent as sodium or zinc salts e.g., RSO<sub>2</sub>Na or (RSO<sub>2</sub>)<sub>2</sub>Zn (3 eq - 6eq), was added to a solution of the test substrate molecule (~2 µmol, 1 eq) in DMSO (~70-100 µL, 30 mM) and TFA (4 eq) followed by *tert*-butyl hydroperoxide, 70% in water (5 eq) at room temperature. The resulting reaction mixture was capped and heated to 50 °C overnight. The crude reaction mixture was dissolved in 3:1 acidic mobile phase (1% acetonitrile, 0.1% formic acid) and acetonitrile (~3 mL) then purified via HPLC (XSelect 5 µm C18 130 Å, 250 x 10 mm @ 2 mL/min). The respective fractions were pooled, and solvent removed using the EZ-2 Elite Genevac (3-hour HPLC setting, 34 °C / 238 mbar to 41 °C / 7 mbar). Each isolate was characterized by MS and NMR. Due to the low amounts of isolates generated, gravimetric mass analysis is not possible; qNMR in conjunction with the enhanced sensitivity using a 1.7 mm micro-cryoprobe in DMSO-*d*<sub>6</sub> solvent was used to determine the concentration of the sample.

#### General Minisci Functionalization with Molander BF<sub>3</sub>K Salts Procedure:

To 1-dram pressure release vial containing the test substrate molecule (~2 µmol, 1 eq), potassium trifluoroborate salt of the radical (1.5 - 2 eq), in a 1:1 mixture of acetic acid and water to make a 30 mM solution and Mn(OAc)<sub>3</sub> was added in one portion. The resulting reaction mixture was capped and heated to 50 °C overnight. The crude reaction mixture was dissolved in 3 :1 acidic mobile phase (1% acetonitrile, 0.1% formic acid) and acetonitrile (~3 mL) then purified via HPLC (XSelect 5 µm C18 130 Å, 250 x 10 mm @ 2 mL/min). The respective fractions were pooled, and solvent removed using the EZ-2 Elite Genevac (3-hour HPLC setting, 34 °C / 238 mbar to 41 °C / 7 mbar). Each isolate was characterized by MS and NMR. Due to the low amounts of isolates generated, gravimetric mass analysis is not possible; qNMR in conjunction with the enhanced sensitivity using a 1.7 mm micro-cryoprobe in DMSO-*d*<sub>6</sub> solvent was used to determine the concentration of the sample.

#### Molecule Dynamics Simulations:

Molecule conformations were generated with MOPAC at the PM7 level of theory.<sup>2</sup> The underlying molecular dynamics (MD) driver was the Atomic Simulation Environment (ASE) package.<sup>3</sup> A Langevin thermostat controlled the temperature. First, the molecular geometry was optimized followed by equilibration to 500 K for 2.5 picoseconds with a timestep of 0.25 femtoseconds. Upon equilibration, conformations were sampled every 2 picoseconds from a production run of 200 picoseconds in the NVT ensemble at 500 Kelvin, using a timestep of 0.5 femtoseconds with the same thermostat. This yielded a total of 100 configurations per molecule.

The message passing neural network was based on MACE.<sup>4</sup> Interatomic distances were incorporated as edge features in the message passing neural network, however, angles were not part of the edge featurization and no universal node was used in this variation of the message passing neural network. A cutoff radius of 5Å was used.

**Table S1: Reagents Used for Each Reaction Type**

| <i>Reaction Type</i>                                               | <i>Reagent</i>                                      | <i>Count</i> |
|--------------------------------------------------------------------|-----------------------------------------------------|--------------|
| Minisci*                                                           | (CF <sub>3</sub> SO <sub>2</sub> ) <sub>2</sub> Zn  | 233          |
|                                                                    | (HCF <sub>2</sub> SO <sub>2</sub> ) <sub>2</sub> Zn | 137          |
|                                                                    | cBuBF <sub>3</sub> K                                | 50           |
|                                                                    | Selectfluor                                         | 39           |
|                                                                    | CF <sub>3</sub> SO <sub>2</sub> Na                  | 28           |
|                                                                    | CH <sub>3</sub> CF <sub>2</sub> SO <sub>2</sub> Na  | 22           |
|                                                                    | HOCH <sub>2</sub> SO <sub>2</sub> Na                | 20           |
|                                                                    | MeOCH <sub>2</sub> BF <sub>3</sub> K                | 18           |
|                                                                    | (iPrSO <sub>2</sub> ) <sub>2</sub> Zn               | 16           |
|                                                                    | iPrBF <sub>3</sub> K                                | 15           |
| (CF <sub>3</sub> CH <sub>2</sub> SO <sub>2</sub> ) <sub>2</sub> Zn | 10                                                  |              |
| Photoredox*                                                        | NFSI                                                | 31           |
|                                                                    | O <sub>2</sub>                                      | 26           |
|                                                                    | tBu peracetate                                      | 18           |
| Electrochem                                                        | H <sub>2</sub> O                                    | 6            |
|                                                                    | CF <sub>3</sub> SO <sub>2</sub> Na                  | 5            |
|                                                                    | CH <sub>3</sub> CF <sub>2</sub> SO <sub>2</sub> Na  | 1            |

\* = Reagents used more than 10 times shown

**Table S2: Dataset Breakdown**

|                              | <i>Minisci</i> | <i>Zinc sulfinate<br/>Minisci</i> | <i>P450</i> | <i>Electrochem</i> | <i>Photoredox</i> |
|------------------------------|----------------|-----------------------------------|-------------|--------------------|-------------------|
| Number of Total Reactions    | 1928           | 463                               | 642         | 12                 | 93                |
| Number of negative reactions | 1056           | 155                               | 74          | 0                  | 34                |

### ***Calculating the Fukui Indices:***

Reactivity indices for electrophilicity and nucleophilicity for the  $i$ -th atom were computed by multiplying the corresponding Fukui index [ $F_i(+)$  or  $F_i(-)$ , respectively] of the  $i$ -th atom by global electrophilicity / nucleophilicity for the given molecule.

Reactivity indices for radical reactions were taken to be equal to the corresponding Fukui indices  $F_i(0)$ . Global nucleophilicity of the molecule was computed as  $8 \text{ eV} + \text{HOMO}$ , and its global electrophilicity as  $(\text{HOMO} + \text{LUMO}) / (2 \times (4 \times (\text{LUMO} - \text{HOMO})))$ , where HOMO and LUMO are the HOMO and LUMO energies of the molecule.

Fukui indices of the  $i$ -th atom  $F_i(+)$ ,  $F_i(-)$  and  $F_i(0)$  were computed as differences between the atomic charge of the  $i$ -th atom in the original molecule  $q_i(N)$  with  $N$  electrons, the charge of the same atom after adding one electron to the molecule  $q_i(N+1)$ , and the charge of the same atom after removing one electron from the molecule  $q_i(N-1)$ :

$$\begin{aligned} F_i(+)&= q_i(N) - q_i(N+1) \\ F_i(-)&= q_i(N-1) - q_i(N) \\ F_i(0)&= \frac{q_i(N-1) - q_i(N+1)}{2} \end{aligned}$$

For electrophilicity and radical indices, quantum chemical computations were run with PBE/6-311G, and for nucleophilicity with B3LYP/6-311G\*\*. As partial atomic charges, Mulliken charges were used. These DFT functionals, basis sets and types of atomic charges were chosen by optimizing the predicting performance of the reactivity indices in  $S_NAr$  and EAS reactions of an internal dataset of small organic molecules (unpublished). Quantum chemical computations were run in Terachem.<sup>5</sup>



### ***Tie Breakers for F-scores:***

Whilst F-scores represented an excellent first pass, it did lead to degenerate best models for a variety of loss function weightings. We thus developed our own in-house metric, EKS metric, that was more discerning than the F-score. Like the F-score, this metric would provide a single number encompassing model accuracy and precision but would be more penalizing towards errors, elucidating model performance differences more easily (Figure S1 & S2). It would also address the challenge of accurate baselines when evaluating model performance. A model that predicts nothing reacts would receive an F-score of 0, and a model that predicts everything reacts would receive a non-negative score (Eq. S1). This is slightly unintuitive, as a model that predicts most atoms will not undergo functionalization is actually representing a more chemically correct understanding of reactivity. The most functionalized molecule only saw 30% number of sites reacting, or 70% of its atoms did not react. Indeed, most of the molecules in our dataset saw 1 reaction site or fewer.

Our in-house metric would give a low score if the model yielded a high number of false positives (FP) or false negatives (FN) and a high score if the model yielded a high number of true positives (TP) or true negatives (TN). The score should also be dependent upon the scarcity of predicted reactive sites. The value of each TP and TN should be dependent on how frequently the model predicts positives and negatives, respectively. An overly cautious model which blindly guesses that all atoms are unreactive should receive a lower value for each TN it predicts compared to a model that is more judicious about its unreactive predictions. To this end, the following metric was used (Eq. S2). The variables,  $pred_p$  and  $true_p$  refer to the ratio of predicted positives to all reactive sites. A  $pred_p$  of 1 indicates a model that predicts all sites react and a  $pred_p$  of 0 indicates a model where every molecule is unreactive. As reference, on the retrospective test set, a perfect model would receive a score of 119, a model that predicts nothing reacts would receive a score of -1.83, and a model that predicts everything reacts would be given a score of -1455. If a prediction is only 3% incorrect, the model score drops to 72, and at only 5% incorrect the score becomes 46.5.

**Equations:**

**Eq. S1:** F-score =  $\frac{2 \cdot TP}{2 \cdot TP + FP + FN}$

**Eq. S2:** score =  $FP \cdot \log(true_p) + FN \cdot \log(1 - true_p) - TP \cdot \log(pred_p) - TN \cdot \log(1 - pred_p)$

**Eq. S3:** BCE Loss =  $\sum_{i=0}^n w_i \cdot (y_i \cdot \log(x_i) + (1 - y_i) \cdot \log(1 - x_i))$

**Eq. S4:** BCE weight 1 =  $x \cdot y \cdot \log(pred_p) + (1 - y) \cdot (1 - x) \cdot \log(1 - pred_p) + (1 - y) \cdot x \cdot \log(true_p) + y \cdot (1 - x) \cdot \log(1 - true_p)$

**Eq. S5:** BCE weight 2 =  $[x \cdot y \cdot \log(pred_p) + (1 - y) \cdot (1 - x) \cdot \log(1 - pred_p) + (1 - y) \cdot x \cdot \log(true_p) + y \cdot (1 - x) \cdot \log(1 - true_p)] + [y \cdot x \cdot \log(true_p)] + (1 - y) \cdot (1 - x) \cdot \log(1 - true_p) + (1 - y) \cdot x \cdot \log(1 - pred_p) + y \cdot x \cdot \log(pred_p)]$

**Eq. S6:** BCE weight 3 =  $2[x \cdot y \cdot \log(pred_p) + (1 - y) \cdot (1 - x) \cdot \log(1 - pred_p) + (1 - y) \cdot x \cdot \log(true_p) + y \cdot (1 - x) \cdot \log(1 - true_p)] + [y \cdot x \cdot \log(true_p)] + (1 - y) \cdot (1 - x) \cdot \log(1 - true_p) + (1 - y) \cdot x \cdot \log(1 - pred_p) + y \cdot x \cdot \log(pred_p)]$

$x$  = predicted values,  $w$  = weighting values,  $y$  = experimental values, always 0 or 1

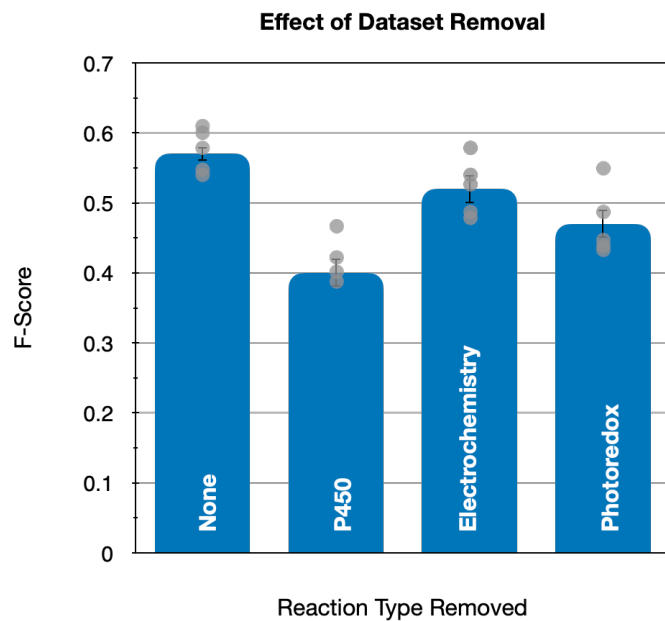

**Figure S1:** The deleterious effect of removing various reaction types from the training data (n=5). The bars in the bar charts represent the average with gray dots representing the individual data points (initializations with identical values are shown as a single point). Standard error bars shown. Source data for each bar chart can be found in source data excel file.

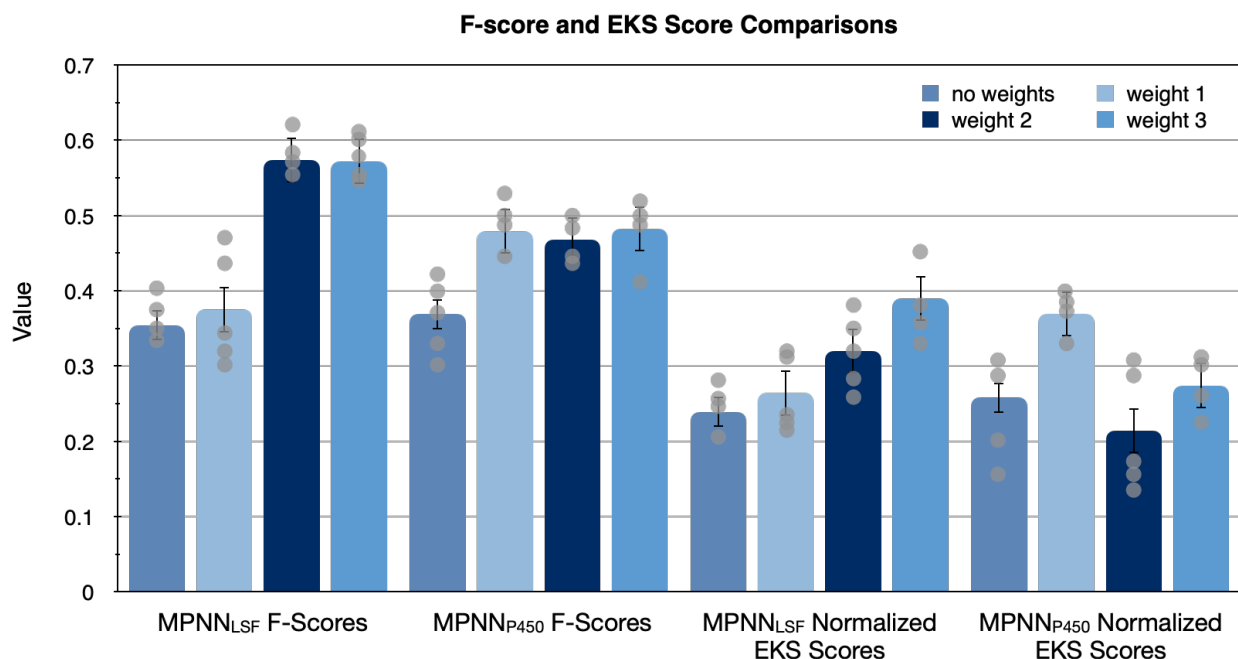

**Figure S2:** The comparisons of the best models', MPNN<sub>LSF</sub> (best model on retrospective test set) and MPNN<sub>P450</sub> (best model on P450-only test set) F-scores and normalized EKS scores at various Binary Cross Entropy Loss weightings on the retrospective and P450-only test set respectively (n=5). MPNN = message passing neural network. Notice that the normalized EKS scores show more discernment in model performance between different weightings. Weight 2 for MPNN<sub>LSF</sub> has a nearly identical F-score with weight 3, but EKS scores show a significant edge to weight 3. The bars in the bar charts represent the average with gray dots representing the individual data points (initializations with identical values are shown as a single point). Standard error bars shown. Source data for each bar chart can be found in source data excel file.

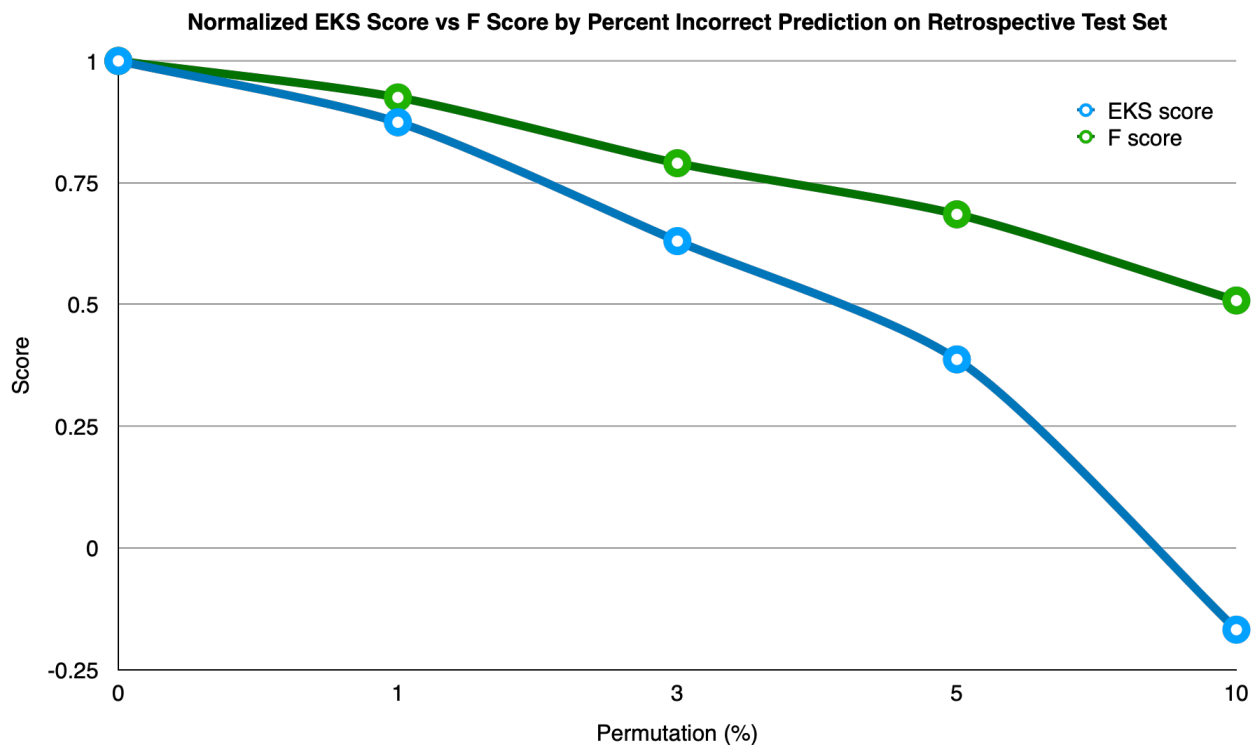

**Figure S3:** Comparison of sensitivity of incorrect predictions between EKS score and F-score. Analysis performed on the retrospective test set. Source data for each bar chart can be found in source data excel file.

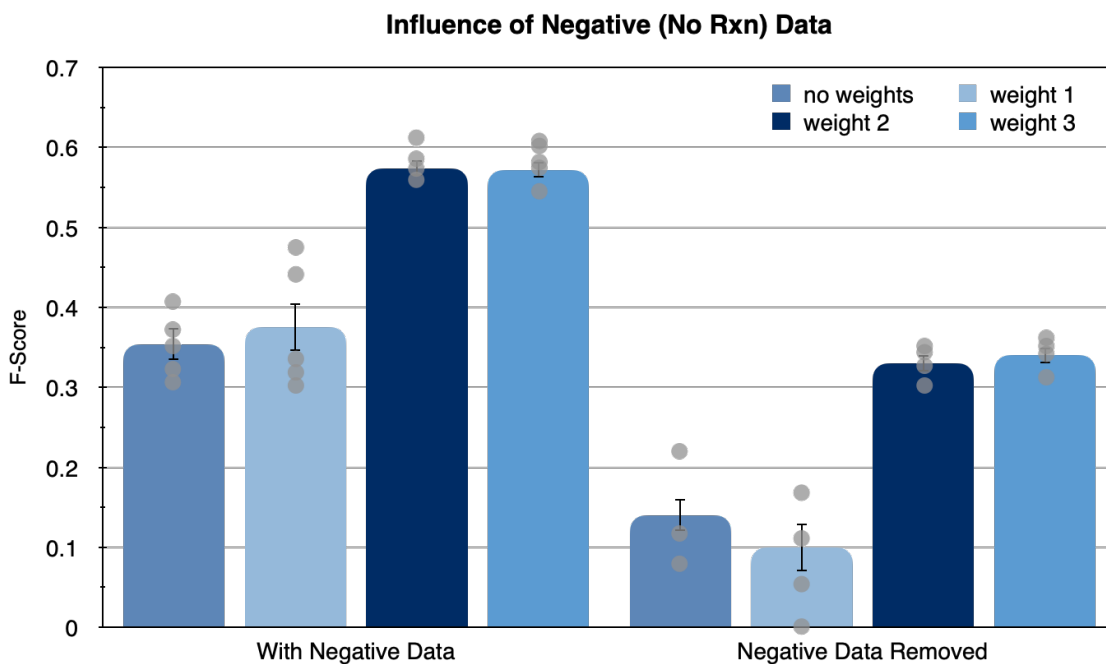

**Figure S4:** The effect of removing datapoints that saw no reaction ( $n=5$ ). The bars in the bar charts represent the average with gray dots representing the individual data points (initializations with identical values are shown as a single point). Standard error bars shown. Source data for each bar chart can be found in source data excel file.

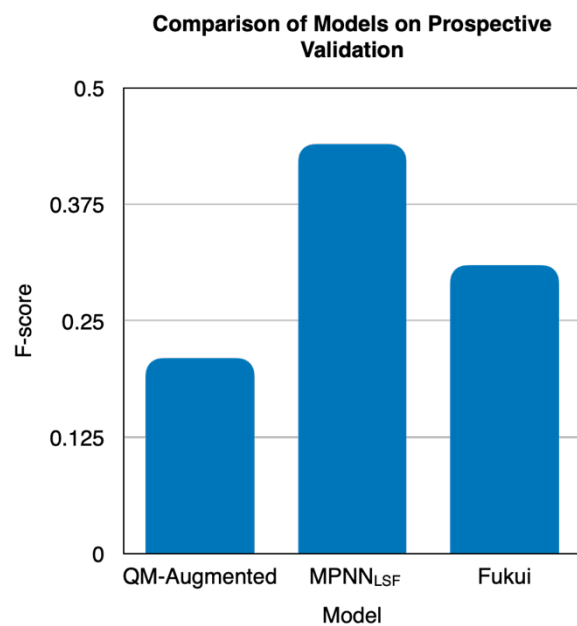

**Figure S5:** Comparison of MPNN<sub>LSF</sub> (best model on retrospective test set) to the Quantum Mechanics-augmented message passing neural network (QM-augmented; molecular dynamics simulations on atomic density representations) on the prospective test set (n=1).

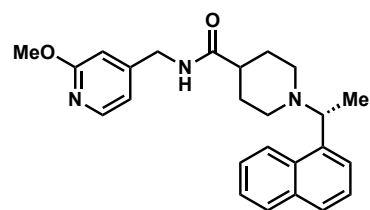

P450S1

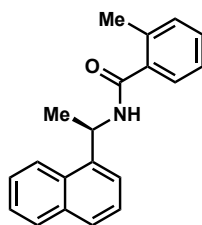

P450S2

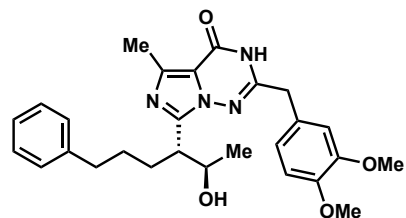

P450S3

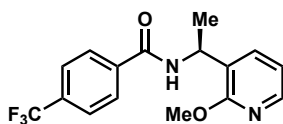

P450S4

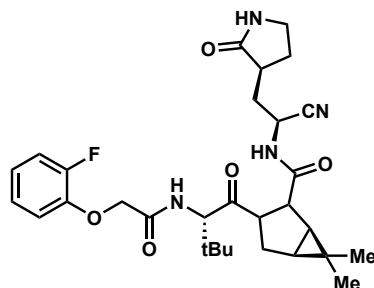

P450S5

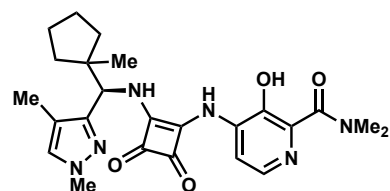

P450S6

**Figure S6:** Representative molecules in the P450-only test set.



**Compound Characterizations:**

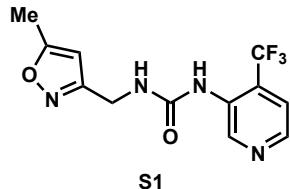

Prepared according to General Minisci Functionalization with Baran Diversinates™ Procedure.

**<sup>1</sup>H NMR (600 MHz, DMSO-d<sub>6</sub>):** δ 9.16 (s, 1H), 8.47 (d, *J* = 2.9 Hz, 1H), 8.22 (s, 1H), 7.66 (d, *J* = 5.1 Hz, 1H), 7.52 (t, *J* = 5.8 Hz, 1H), 6.18 (s, 1H), 4.34 (d, *J* = 5.7 Hz, 2H), 2.39 (s, 3H).

**HRMS:** calcd for C<sub>12</sub>H<sub>11</sub>F<sub>3</sub>N<sub>4</sub>O<sub>2</sub>H<sup>+</sup> ([M+H]) 301.0907, found 301.0917.

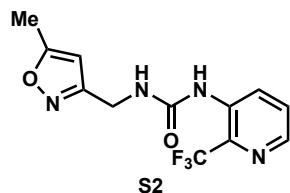

Prepared according to General Minisci Functionalization with Baran Diversinates™ Procedure.

**<sup>1</sup>H NMR (600 MHz, DMSO-d<sub>6</sub>):** δ 8.42 (d, *J* = 8.5 Hz, 1H), 8.36 (d, *J* = 4.5 Hz, 1H), 8.20 (s, 1H), 7.65 (dd, *J* = 8.5, 4.5 Hz, 1H), 7.60 (t, *J* = 5.8 Hz, 1H), 6.17 (s, 1H), 4.33 (d, *J* = 5.7 Hz, 2H), 2.39 (s, 3H).

**HRMS:** calcd for C<sub>12</sub>H<sub>11</sub>F<sub>3</sub>N<sub>4</sub>O<sub>2</sub>H<sup>+</sup> ([M+H]) 301.0907, found 301.0907.

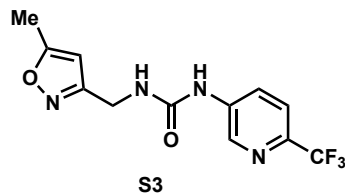

Prepared according to General Minisci Functionalization with Baran Diversinates™ Procedure.

**<sup>1</sup>H NMR (600 MHz, DMSO-d<sub>6</sub>):** δ 9.37 (s, 1H), 8.69 (d, *J* = 2.5 Hz, 1H), 8.17 (dd, *J* = 8.5, 2.5 Hz, 1H), 7.77 (d, *J* = 8.7 Hz, 1H), 7.00 (t, *J* = 5.9 Hz, 1H), 6.17 (s, 1H), 4.33 (d, *J* = 5.8 Hz, 2H), 2.38 (s, 3H).

**HRMS:** calcd for C<sub>12</sub>H<sub>11</sub>F<sub>3</sub>N<sub>4</sub>O<sub>2</sub>H<sup>+</sup> ([M+H]) 301.0907, found 301.0914.

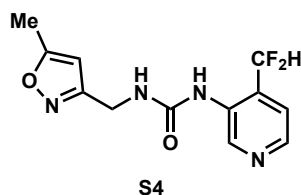

Prepared according to General Minisci Functionalization with Baran Diversinates™ Procedure.

**<sup>1</sup>H NMR (600 MHz, DMSO-*d*<sub>6</sub>):** δ 8.96 (s, 1H), 8.43 (s, 1H), 8.41 (d, *J* = 5.0 Hz, 1H), 7.50 (d, *J* = 5.0 Hz, 1H), 7.26 (t, *J* = 5.9 Hz, 1H), 7.12 (t, *J* = 54.4 Hz, 1H), 6.18 (s, 1H), 4.33 (d, *J* = 5.8 Hz, 2H), 2.39 (s, 3H).

**HRMS:** calcd for C<sub>12</sub>H<sub>12</sub>F<sub>2</sub>N<sub>4</sub>O<sub>2</sub>H<sup>+</sup> ([M+H]) 283.1001, found 283.1002.

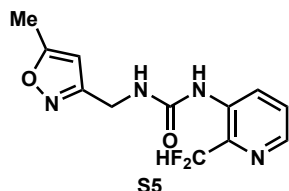

Prepared according to General Minisci Functionalization with Baran Diversinates™ Procedure.

**<sup>1</sup>H NMR (600 MHz, DMSO-*d*<sub>6</sub>):** δ 8.33 (s, 1H), 8.32 – 8.29 (m, 2H), 7.51 (dd, *J* = 8.5, 4.6 Hz, 1H), 7.48 (t, *J* = 5.7 Hz, 1H), 7.00 (t, *J* = 53.8 Hz, 1H), 6.17 (s, 1H), 4.32 (d, *J* = 5.7 Hz, 2H), 2.39 (s, 3H).

**HRMS:** calcd for C<sub>12</sub>H<sub>12</sub>F<sub>2</sub>N<sub>4</sub>O<sub>2</sub>H<sup>+</sup> ([M+H]) 283.1001, found 283.1008.

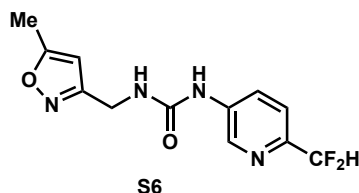

Prepared according to General Minisci Functionalization with Baran Diversinates™ Procedure.

**<sup>1</sup>H NMR (600 MHz, DMSO-*d*<sub>6</sub>):** δ 9.19 (s, 1H), 8.64 (d, *J* = 2.5 Hz, 1H), 8.08 (dd, *J* = 8.7, 2.5 Hz, 1H), 7.58 (d, *J* = 8.6 Hz, 1H), 6.93 (t, *J* = 5.8 Hz, 1H), 6.85 (t, *J* = 55.3 Hz, 1H), 6.16 (s, 1H), 4.32 (d, *J* = 5.7 Hz, 2H), 2.38 (s, 3H).

**HRMS:** calcd for C<sub>12</sub>H<sub>12</sub>F<sub>2</sub>N<sub>4</sub>O<sub>2</sub>H<sup>+</sup> ([M+H]) 283.1001, found 283.1003.

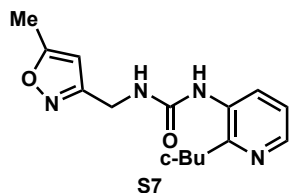

Prepared according to General Minisci Functionalization with Molander BF<sub>3</sub>K Salts Procedure.

**<sup>1</sup>H NMR (600 MHz, DMSO-*d*<sub>6</sub>):** δ 8.19 (d, *J* = 4.3 Hz, 1H), 8.12 (d, *J* = 8.2 Hz, 1H), 7.80 (s, 1H), 7.19 (t, *J* = 5.8 Hz, 1H), 7.16 (dd, *J* = 8.2, 4.8 Hz, 1H), 6.17 (s, 1H), 4.31 (d, *J* = 5.7 Hz,

2H), 3.76 (p,  $J = 8.5$  Hz, 1H), 2.39 (s, 3H), 2.35 – 2.24 (m, 4H), 2.04 – 1.94 (m, 1H), 1.85 – 1.78 (m, 1H).

**HRMS:** calcd for  $C_{15}H_{16}N_4O_2H^+$  ( $[M+H]$ ) 287.1503, found 287.1511.

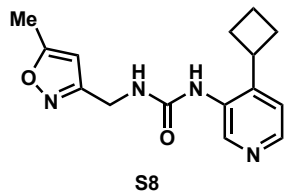

Prepared according to General Minisci Functionalization with Molander  $BF_3K$  Salts Procedure.

**$^1H$  NMR (600 MHz,  $DMSO-d_6$ ):**  $\delta$  8.82 (s, 1H), 8.24 (s, 1H), 7.81 (s, 1H), 7.31 (s, 1H), 7.14 (t,  $J = 6.2$  Hz, 1H), 6.17 (s, 1H), 4.31 (d,  $J = 5.8$  Hz, 2H), 3.61 (p,  $J = 9.0, 8.5$  Hz, 1H), 2.39 (s, 3H), 2.39 – 2.32 (m, 2H), 2.09 – 1.96 (m, 3H), 1.84 – 1.77 (m, 1H).

**HRMS:** calcd for  $C_{15}H_{16}N_4O_2H^+$  ( $[M+H]$ ) 287.1503, found 287.1506.

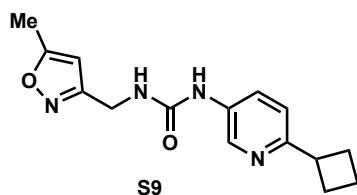

Prepared according to General Minisci Functionalization with Molander  $BF_3K$  Salts Procedure.

**$^1H$  NMR (600 MHz,  $DMSO-d_6$ ):**  $\delta$  8.81 (s, 1H), 8.49 (s, 1H), 7.83 (d,  $J = 8.5$  Hz, 1H), 7.16 (s, 1H), 6.76 (s, 1H), 6.15 (s, 1H), 4.30 (d,  $J = 5.9$  Hz, 2H), 3.57 (p,  $J = 8.4, 7.9$  Hz, 1H), 2.37 (s, 3H), 2.27 – 2.19 (m, 4H), 2.00 – 1.93 (m, 1H), 1.86 – 1.78 (m, 1H).

**HRMS:** calcd for  $C_{15}H_{16}N_4O_2H^+$  ( $[M+H]$ ) 287.1503, found 287.1496.

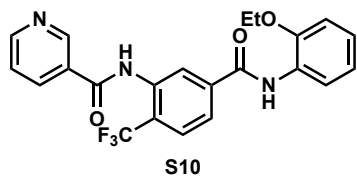

Prepared according to General Minisci Functionalization with Baran Diversinates™ Procedure.

**$^1H$  NMR (600 MHz,  $DMSO-d_6$ ):**  $\delta$  10.57 (s, 1H), 9.76 (s, 1H), 9.13 (d,  $J = 2.3$  Hz, 1H), 8.81 (dd,  $J = 4.9, 1.7$  Hz, 1H), 8.31 (dt,  $J = 8.0, 2.0$  Hz, 1H), 8.13 (s, 1H), 8.12 (d,  $J = 8.9$  Hz, 1H), 8.01 (d,  $J = 8.2$  Hz, 1H), 7.69 (d,  $J = 7.9$  Hz, 1H), 7.62 (dd,  $J = 8.1, 4.6$  Hz, 1H), 7.21 (t,  $J = 7.4$  Hz, 1H), 7.11 (d,  $J = 8.4$  Hz, 1H), 6.98 (t,  $J = 7.6$  Hz, 1H), 4.11 (q,  $J = 7.0$  Hz, 2H), 1.34 (t,  $J = 6.8$  Hz, 3H).

**HRMS:** calcd for  $C_{22}H_{18}F_3N_3O_3H^+$  ( $[M+H]$ ) 430.1373, found 430.1366.

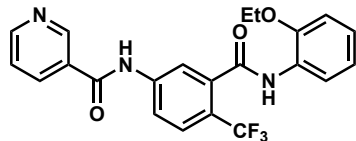

S11

Prepared according to General Minisci Functionalization with Baran Diversinates™ Procedure.

**<sup>1</sup>H NMR (600 MHz, DMSO-*d*<sub>6</sub>):** δ 10.90 (s, 1H), 9.64 (s, 1H), 9.15 (s, 1H), 8.81 (d, *J* = 4.8 Hz, 1H), 8.34 (dt, *J* = 8.1, 2.1 Hz, 1H), 8.13 (d, *J* = 2.2 Hz, 1H), 8.10 (d, *J* = 8.7 Hz, 1H), 7.85 (d, *J* = 8.7 Hz, 1H), 7.79 (d, *J* = 7.9 Hz, 1H), 7.62 (dd, *J* = 8.0, 4.7 Hz, 1H), 7.18 (t, *J* = 7.9 Hz, 1H), 7.09 (d, *J* = 8.2 Hz, 1H), 6.97 (t, *J* = 7.6 Hz, 1H), 4.09 (q, *J* = 6.9 Hz, 2H), 1.35 (t, *J* = 7.0 Hz, 3H).

**HRMS:** calcd for C<sub>22</sub>H<sub>18</sub>F<sub>3</sub>N<sub>3</sub>O<sub>3</sub>H<sup>+</sup> ([M+H]) 430.1373, found 430.1375.

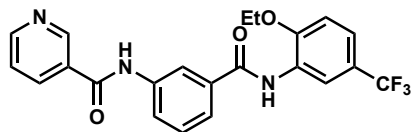

S12

Prepared according to General Minisci Functionalization with Baran Diversinates™ Procedure.

**<sup>1</sup>H NMR (600 MHz, DMSO-*d*<sub>6</sub>):** δ 10.68 (s, 1H), 9.55 (s, 1H), 9.15 (d, *J* = 2.3 Hz, 1H), 8.79 (dd, *J* = 4.7, 1.7 Hz, 1H), 8.41 (s, 1H), 8.34 (dt, *J* = 8.0, 2.0 Hz, 1H), 8.28 (d, *J* = 2.4 Hz, 1H), 8.01 (dd, *J* = 8.0, 2.2 Hz, 1H), 7.73 (d, *J* = 7.7 Hz, 1H), 7.60 (dd, *J* = 8.0, 4.8 Hz, 1H), 7.57 (t, *J* = 8.1 Hz, 1H), 7.54 (dd, *J* = 8.8, 2.8 Hz, 1H), 7.30 (d, *J* = 8.6 Hz, 1H), 4.24 (q, *J* = 7.0 Hz, 2H), 1.42 (t, *J* = 7.0 Hz, 3H).

**HRMS:** calcd for C<sub>22</sub>H<sub>18</sub>F<sub>3</sub>N<sub>3</sub>O<sub>3</sub>H<sup>+</sup> ([M+H]) 430.1373, found 430.1369.

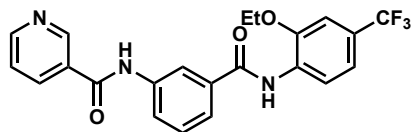

S13

Prepared according to General Minisci Functionalization with Baran Diversinates™ Procedure.

**<sup>1</sup>H NMR (600 MHz, DMSO-*d*<sub>6</sub>):** δ 10.68 (s, 1H), 9.52 (s, 1H), 9.15 (s, 1H), 8.79 (d, *J* = 4.9 Hz, 1H), 8.42 (s, 1H), 8.34 (dt, *J* = 8.1, 2.0 Hz, 1H), 8.19 (d, *J* = 8.2 Hz, 1H), 8.03 (dd, *J* = 8.0, 2.2 Hz, 1H), 7.73 (d, *J* = 7.7 Hz, 1H), 7.60 (dd, *J* = 8.0, 4.9 Hz, 1H), 7.57 (t, *J* = 7.9 Hz, 1H), 7.39 (s, 1H), 7.37 (d, *J* = 9.1 Hz, 1H), 4.24 (q, *J* = 6.9 Hz, 2H), 1.42 (t, *J* = 6.9 Hz, 3H).

**HRMS:** calcd for C<sub>22</sub>H<sub>18</sub>F<sub>3</sub>N<sub>3</sub>O<sub>3</sub>H<sup>+</sup> ([M+H]) 430.1373, found 430.1373.

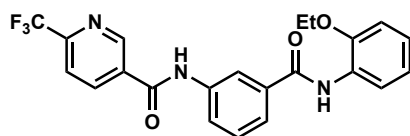

S14

Prepared according to General Minisci Functionalization with Baran Diversinates™ Procedure.

**<sup>1</sup>H NMR (600 MHz, DMSO-*d*<sub>6</sub>):** δ 10.85 (s, 1H), 9.35 (s, 1H), 9.28 (s, 1H), 8.61 (d, *J* = 8.0 Hz, 1H), 8.37 (s, 1H), 8.13 (d, *J* = 8.1 Hz, 1H), 8.01 (d, *J* = 7.8 Hz, 1H), 7.87 (d, *J* = 7.9 Hz, 1H), 7.74 (d, *J* = 8.0 Hz, 1H), 7.57 (t, *J* = 7.9 Hz, 1H), 7.16 (t, *J* = 8.1 Hz, 1H), 7.10 (d, *J* = 8.2 Hz, 1H), 6.97 (t, *J* = 7.7 Hz, 1H), 4.12 (q, *J* = 7.0 Hz, 2H), 1.38 (t, *J* = 6.7 Hz, 3H).

**HRMS:** calcd for C<sub>22</sub>H<sub>18</sub>F<sub>3</sub>N<sub>3</sub>O<sub>3</sub>H<sup>+</sup> ([M+H]) 430.1373, found 430.1367.

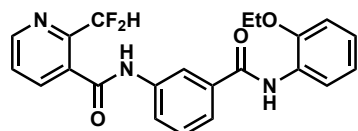

S15

Prepared according to General Minisci Functionalization with Baran Diversinates™ Procedure.

**<sup>1</sup>H NMR (600 MHz, DMSO-*d*<sub>6</sub>):** δ 10.87 (s, 1H), 9.33 (s, 1H), 8.85 (d, *J* = 4.7 Hz, 1H), 8.35 (s, 1H), 8.23 (d, *J* = 7.8 Hz, 1H), 7.92 – 7.87 (m, 2H), 7.75 (dd, *J* = 7.9, 5.0 Hz, 1H), 7.73 (d, *J* = 7.8 Hz, 1H), 7.55 (t, *J* = 7.9 Hz, 1H), 7.22 (t, *J* = 53.9 Hz, 1H), 7.16 (t, *J* = 7.8 Hz, 1H), 7.10 (d, *J* = 8.2 Hz, 1H), 6.98 (t, *J* = 7.6 Hz, 1H), 4.13 (q, *J* = 6.9 Hz, 2H), 1.39 (t, *J* = 6.9 Hz, 3H).

**HRMS:** calcd for C<sub>22</sub>H<sub>19</sub>F<sub>2</sub>N<sub>3</sub>O<sub>3</sub>H<sup>+</sup> ([M+H]) 412.1467, found 412.1472.

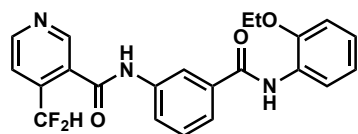

S16

Prepared according to General Minisci Functionalization with Baran Diversinates™ Procedure.

**<sup>1</sup>H NMR (600 MHz, DMSO-*d*<sub>6</sub>):** δ 10.96 (s, 1H), 9.33 (s, 1H), 9.06 (s, 1H), 8.94 (d, *J* = 5.1 Hz, 1H), 8.37 (s, 1H), 7.93 – 7.88 (m, 2H), 7.78 (d, *J* = 5.1 Hz, 1H), 7.74 (d, *J* = 7.7 Hz, 1H), 7.56 (t, *J* = 7.9 Hz, 1H), 7.42 (t, *J* = 54.6 Hz, 1H), 7.16 (t, *J* = 7.8 Hz, 1H), 7.11 (d, *J* = 8.1 Hz, 1H), 6.98 (t, *J* = 7.6 Hz, 1H), 4.13 (q, *J* = 7.0 Hz, 2H), 1.39 (t, *J* = 6.9 Hz, 3H).

**HRMS:** calcd for C<sub>22</sub>H<sub>19</sub>F<sub>2</sub>N<sub>3</sub>O<sub>3</sub>H<sup>+</sup> ([M+H]) 412.1467, found 412.1473.

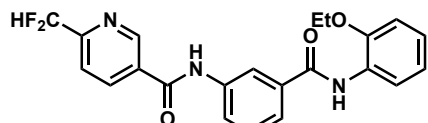

S17

Prepared according to General Minisci Functionalization with Baran Diversinates™ Procedure.

**<sup>1</sup>H NMR (600 MHz, DMSO-*d*<sub>6</sub>):** δ 10.78 (s, 1H), 9.35 (s, 1H), 9.23 (s, 1H), 8.53 (dd, *J* = 8.1, 2.3 Hz, 1H), 8.38 (s, 1H), 8.02 (d, *J* = 8.0 Hz, 1H), 7.91 (d, *J* = 8.1 Hz, 1H), 7.88 (d, *J* = 7.9 Hz, 1H), 7.74 (d, *J* = 7.7 Hz, 1H), 7.57 (t, *J* = 7.9 Hz, 1H), 7.16 (d, *J* = 7.7 Hz, 1H), 7.11 (d, *J* = 8.3 Hz, 1H), 7.09 (t, *J* = 55.1 Hz, 1H), 6.98 (d, *J* = 7.6 Hz, 1H), 4.13 (q, *J* = 6.9 Hz, 2H), 1.39 (t, *J* = 6.9 Hz, 3H).

**HRMS:** calcd for C<sub>22</sub>H<sub>19</sub>F<sub>2</sub>N<sub>3</sub>O<sub>3</sub>H<sup>+</sup> ([M+H]) 412.1467, found 412.1467.

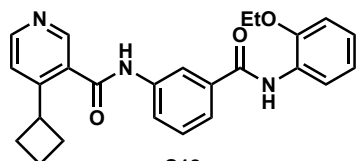

S18

Prepared according to General Minisci Functionalization with Molander BF<sub>3</sub>K Salts Procedure.

**<sup>1</sup>H NMR (600 MHz, DMSO-*d*<sub>6</sub>):** δ 10.75 (s, 1H), 9.31 (s, 1H), 8.80 – 8.64 (m, 2H), 8.36 (s, 1H), 7.91 (d, *J* = 7.9 Hz, 1H), 7.87 (dd, *J* = 8.0, 2.2 Hz, 1H), 7.71 (d, *J* = 7.7 Hz, 1H), 7.59 (d, *J* = 5.1 Hz, 1H), 7.54 (t, *J* = 7.9 Hz, 1H), 7.16 (td, *J* = 7.8, 1.7 Hz, 1H), 7.10 (d, *J* = 8.0 Hz, 1H), 6.98 (t, *J* = 7.5 Hz, 1H), 4.13 (q, *J* = 6.9 Hz, 2H), 3.92 (p, *J* = 8.8 Hz, 1H), 2.34 – 2.25 (m, 2H), 2.22 – 2.11 (m, 2H), 2.05 – 1.93 (m, 1H), 1.84 – 1.75 (m, 1H), 1.39 (t, *J* = 7.0 Hz, 3H).

**HRMS:** calcd for C<sub>25</sub>H<sub>25</sub>N<sub>3</sub>O<sub>3</sub>H<sup>+</sup> ([M+H]) 416.1969, found 416.1968.

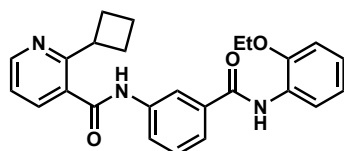

S19

Prepared according to General Minisci Functionalization with Molander BF<sub>3</sub>K Salts Procedure.

**<sup>1</sup>H NMR (600 MHz, DMSO-*d*<sub>6</sub>):** δ 10.66 (s, 1H), 9.31 (s, 1H), 8.70 (dd, *J* = 5.0, 1.7 Hz, 1H), 8.37 (s, 1H), 7.93 – 7.88 (m, 2H), 7.87 (d, *J* = 7.8 Hz, 1H), 7.70 (d, *J* = 7.7 Hz, 1H), 7.53 (t, *J* = 7.9 Hz, 1H), 7.40 (dd, *J* = 7.7, 4.9 Hz, 1H), 7.16 (t, *J* = 7.2 Hz, 1H), 7.10 (d, *J* = 8.1 Hz, 1H), 6.98 (t, *J* = 7.6 Hz, 1H), 4.13 (q, *J* = 6.9 Hz, 2H), 3.98 (p, *J* = 8.6 Hz, 1H), 2.45 – 2.34 (m, 2H), 2.26 – 2.16 (m, 2H), 2.03 – 1.91 (m, 1H), 1.84 – 1.75 (m, 1H), 1.39 (t, *J* = 6.9 Hz, 3H).

**HRMS:** calcd for C<sub>25</sub>H<sub>25</sub>N<sub>3</sub>O<sub>3</sub>H<sup>+</sup> ([M+H]) 416.1969, found 416.1960.

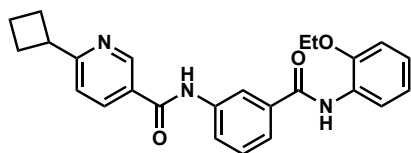

S20

Prepared according to General Minisci Functionalization with Molander  $\text{BF}_3\text{K}$  Salts Procedure.

**$^1\text{H}$  NMR (600 MHz,  $\text{DMSO-d}_6$ ):**  $\delta$  10.62 (s, 1H), 9.33 (s, 1H), 9.12 (d,  $J = 2.3$  Hz, 1H), 8.40 – 8.32 (m, 2H), 8.01 (dd,  $J = 8.1, 2.2$  Hz, 1H), 7.89 (dd,  $J = 7.9, 1.6$  Hz, 1H), 7.72 (d,  $J = 7.7$  Hz, 1H), 7.60 – 7.50 (m, 2H), 7.16 (td,  $J = 7.8, 1.7$  Hz, 1H), 7.10 (d,  $J = 8.1$  Hz, 1H), 6.98 (t,  $J = 7.5$  Hz, 1H), 4.13 (q,  $J = 6.9$  Hz, 2H), 3.79 (p,  $J = 8.6$  Hz, 1H), 2.41 – 2.28 (m, 4H), 2.11 – 2.00 (m, 1H), 1.94 – 1.85 (m, 1H), 1.39 (t,  $J = 7.0$  Hz, 3H).

**HRMS:** calcd for  $\text{C}_{25}\text{H}_{25}\text{N}_3\text{O}_3\text{H}^+$  ( $[\text{M}+\text{H}]$ ) 416.1969, found 416.1971.

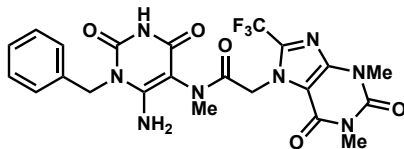

S21

Prepared according to General Minisci Functionalization with Baran Diversinates<sup>TM</sup> Procedure.

**$^1\text{H}$  NMR (600 MHz,  $\text{DMSO-d}_6$ ):**  $\delta$  11.01 (s, 1H), 7.35 (t,  $J = 7.5$  Hz, 2H), 7.30 – 7.21 (m, 5H), 5.16 (q,  $J = 17.5, 17.0$  Hz, 2H), 5.05 (d,  $J = 16.5$  Hz, 1H), 4.96 (d,  $J = 16.6$  Hz, 1H), 3.46 (s, 3H), 3.23 (s, 3H), 2.92 (s, 3H).

**HRMS:** calcd for  $\text{C}_{22}\text{H}_{21}\text{F}_3\text{N}_8\text{O}_5\text{H}^+$  ( $[\text{M}+\text{H}]$ ) 535.1660, found 535.1666.

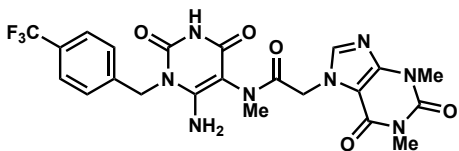

S22

Prepared according to General Minisci Functionalization with Baran Diversinates<sup>TM</sup> Procedure.

**$^1\text{H}$  NMR (600 MHz,  $\text{DMSO-d}_6$ ):**  $\delta$  11.07 (s, 1H), 7.99 (s, 1H), 7.73 (d,  $J = 8.1$  Hz, 2H), 7.47 (d,  $J = 8.0$  Hz, 2H), 5.23 (q,  $J = 17.7$  Hz, 2H), 5.08 (d,  $J = 16.6$  Hz, 1H), 4.95 (d,  $J = 16.6$  Hz, 1H), 3.45 (s, 3H), 3.20 (s, 3H), 2.93 (s, 3H).

**HRMS:** calcd for  $\text{C}_{22}\text{H}_{21}\text{F}_3\text{N}_8\text{O}_5\text{H}^+$  ( $[\text{M}+\text{H}]$ ) 535.1660, found 535.1655.

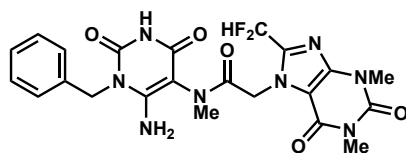

S23

Prepared according to General Minisci Functionalization with Baran Diversinates™ Procedure.

**<sup>1</sup>H NMR (600 MHz, DMSO-*d*<sub>6</sub>):** δ 11.04 (s, 1H), 7.35 (t, *J* = 7.5 Hz, 2H), 7.30 – 7.23 (m, 5H), 7.12 (t, *J* = 51.7 Hz, 1H), 5.25 (s, 2H), 5.15 (q, *J* = 17.0 Hz, 2H), 3.46 (s, 3H), 3.22 (s, 3H), 2.92 (s, 3H).

**HRMS:** calcd for C<sub>22</sub>H<sub>22</sub>F<sub>2</sub>N<sub>8</sub>O<sub>5</sub>H<sup>+</sup> ([M+H]) 517.1754, found 517.1744.

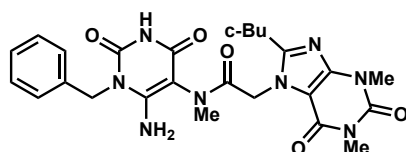

S24

Prepared according to General Minisci Functionalization with Molander BF<sub>3</sub>K Salts Procedure.

**<sup>1</sup>H NMR (600 MHz, DMSO-*d*<sub>6</sub>):** δ 11.02 (s, 1H), 7.35 (t, *J* = 7.5 Hz, 2H), 7.29 – 7.23 (m, 5H), 5.16 (s, 2H), 4.97 (d, *J* = 17.2 Hz, 1H), 4.85 (d, *J* = 17.0 Hz, 1H), 3.55 (p, *J* = 8.6 Hz, 1H), 3.46 (s, 3H), 3.19 (s, 3H), 2.91 (s, 3H), 2.45 – 2.36 (m, 1H), 2.28 – 2.17 (m, 3H), 2.00 – 1.89 (m, 1H), 1.87 – 1.79 (m, 1H).

**HRMS:** calcd for C<sub>25</sub>H<sub>28</sub>N<sub>8</sub>O<sub>5</sub>H<sup>+</sup> ([M+H]) 521.2255, found 521.2263.

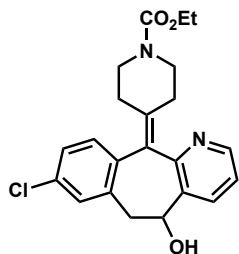

S25

Prepared according to Liver Microsomes and Recombinant CYP Enzyme Screen Procedure and Biomimetic Metalloporphyrin Oxidation Screen Procedure.

**<sup>1</sup>H NMR (600 MHz, DMSO-*d*<sub>6</sub>):** δ 8.42 – 8.36 (m, 1H), 7.88 – 7.76 (m, 1H), 7.32 – 7.19 (m, 3H), 7.14 – 7.07 (m, 1H), 6.11 – 5.55 (m, br, 1H), 5.19 – 5.17 (m, 1H), 4.08 – 4.00 (m, 2H), 3.70 – 3.55 (m, 2H), 3.50 – 3.45 (m, 1H), 3.27 – 3.11 (m, 2H), 3.07 – 2.74 (m, 1H), 2.43 – 2.01 (m, 4H), 1.21 – 1.14 (m, 3H).



**HRMS:** calcd for C<sub>22</sub>H<sub>23</sub>ClN<sub>2</sub>O<sub>3</sub>H<sup>+</sup> ([M+H]) 399.1475, found 399.1474.

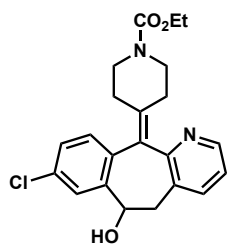

S26

Prepared according to Liver Microsomes and Recombinant CYP Enzyme Screen Procedure and Biomimetic Metalloporphyrin Oxidation Screen Procedure.

**<sup>1</sup>H NMR (600 MHz, DMSO-d<sub>6</sub>):** δ 8.38 – 8.30 (m, 1H), 7.77 – 7.43 (m, 2H), 7.27 (d, *J* = 8.0 Hz, 1H), 7.23 – 7.17 (m, 1H), 7.13 – 7.06 (m, 1H), 5.29 – 4.56 (m, 1H), 4.04 (q, *J* = 7.1 Hz, 2H), 3.76 – 3.56 (m, 2H), 3.50 – 3.33 (m, 1H), 3.27 – 3.12 (m, 2H), 3.06 – 2.73 (m, 1H), 2.46 – 2.35 (m, 1H), 2.28 – 2.16 (m, 2H), 2.14 – 1.99 (m, 1H), 1.17 (t, *J* = 7.1 Hz, 3H).

**HRMS:** calcd for C<sub>22</sub>H<sub>23</sub>ClN<sub>2</sub>O<sub>3</sub>H<sup>+</sup> ([M+H]) 399.1475, found 399.1475.

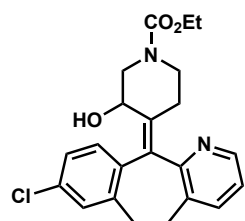

S27

Prepared according to Liver Microsomes and Recombinant CYP Enzyme Screen Procedure and Biomimetic Metalloporphyrin Oxidation Screen Procedure.

**<sup>1</sup>H NMR (600 MHz, DMSO-d<sub>6</sub>):** δ 8.35 (d, *J* = 4.7 Hz, 1H), 7.64 – 7.54 (m, 1H), 7.41 – 7.04 (m, 4H), 5.38 – 4.82 (m, 1H), 4.42 – 3.86 (m, 7H), 3.38 – 3.24 (m, 2H), 2.89 – 2.73 (m, 2H), 2.58 – 2.12 (m, 2H), 1.20 – 1.10 (m, 3H).

**HRMS:** calcd for C<sub>22</sub>H<sub>23</sub>ClN<sub>2</sub>O<sub>3</sub>H<sup>+</sup> ([M+H]) 399.1475, found 399.1475.

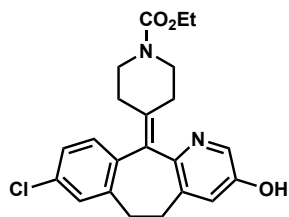

S28

Prepared according to Biomimetic Metalloporphyrin Oxidation Screen Procedure.

**<sup>1</sup>H NMR (600 MHz, DMSO-*d*<sub>6</sub>):**  $\delta$  7.90 (d,  $J$  = 2.6 Hz, 1H), 7.29 (d,  $J$  = 2.3 Hz, 1H), 7.19 (dd,  $J$  = 8.1, 2.3 Hz, 1H), 7.05 (d,  $J$  = 8.1 Hz, 1H), 6.93 (d,  $J$  = 2.7 Hz, 1H), 4.04 (q,  $J$  = 7.1 Hz, 2H), 3.65 – 3.55 (m, 2H), 3.37 – 3.11 (m, 4H), 2.83 – 2.68 (m, 2H), 2.36 – 2.29 (m, 1H), 2.28 – 2.21 (m, 1H), 2.21 – 2.10 (m, 2H), 1.17 (t,  $J$  = 7.1 Hz, 3H)

**HRMS:** calcd for C<sub>22</sub>H<sub>23</sub>ClN<sub>2</sub>O<sub>3</sub>H<sup>+</sup> ([M+H]) 399.1475, found 399.1478.

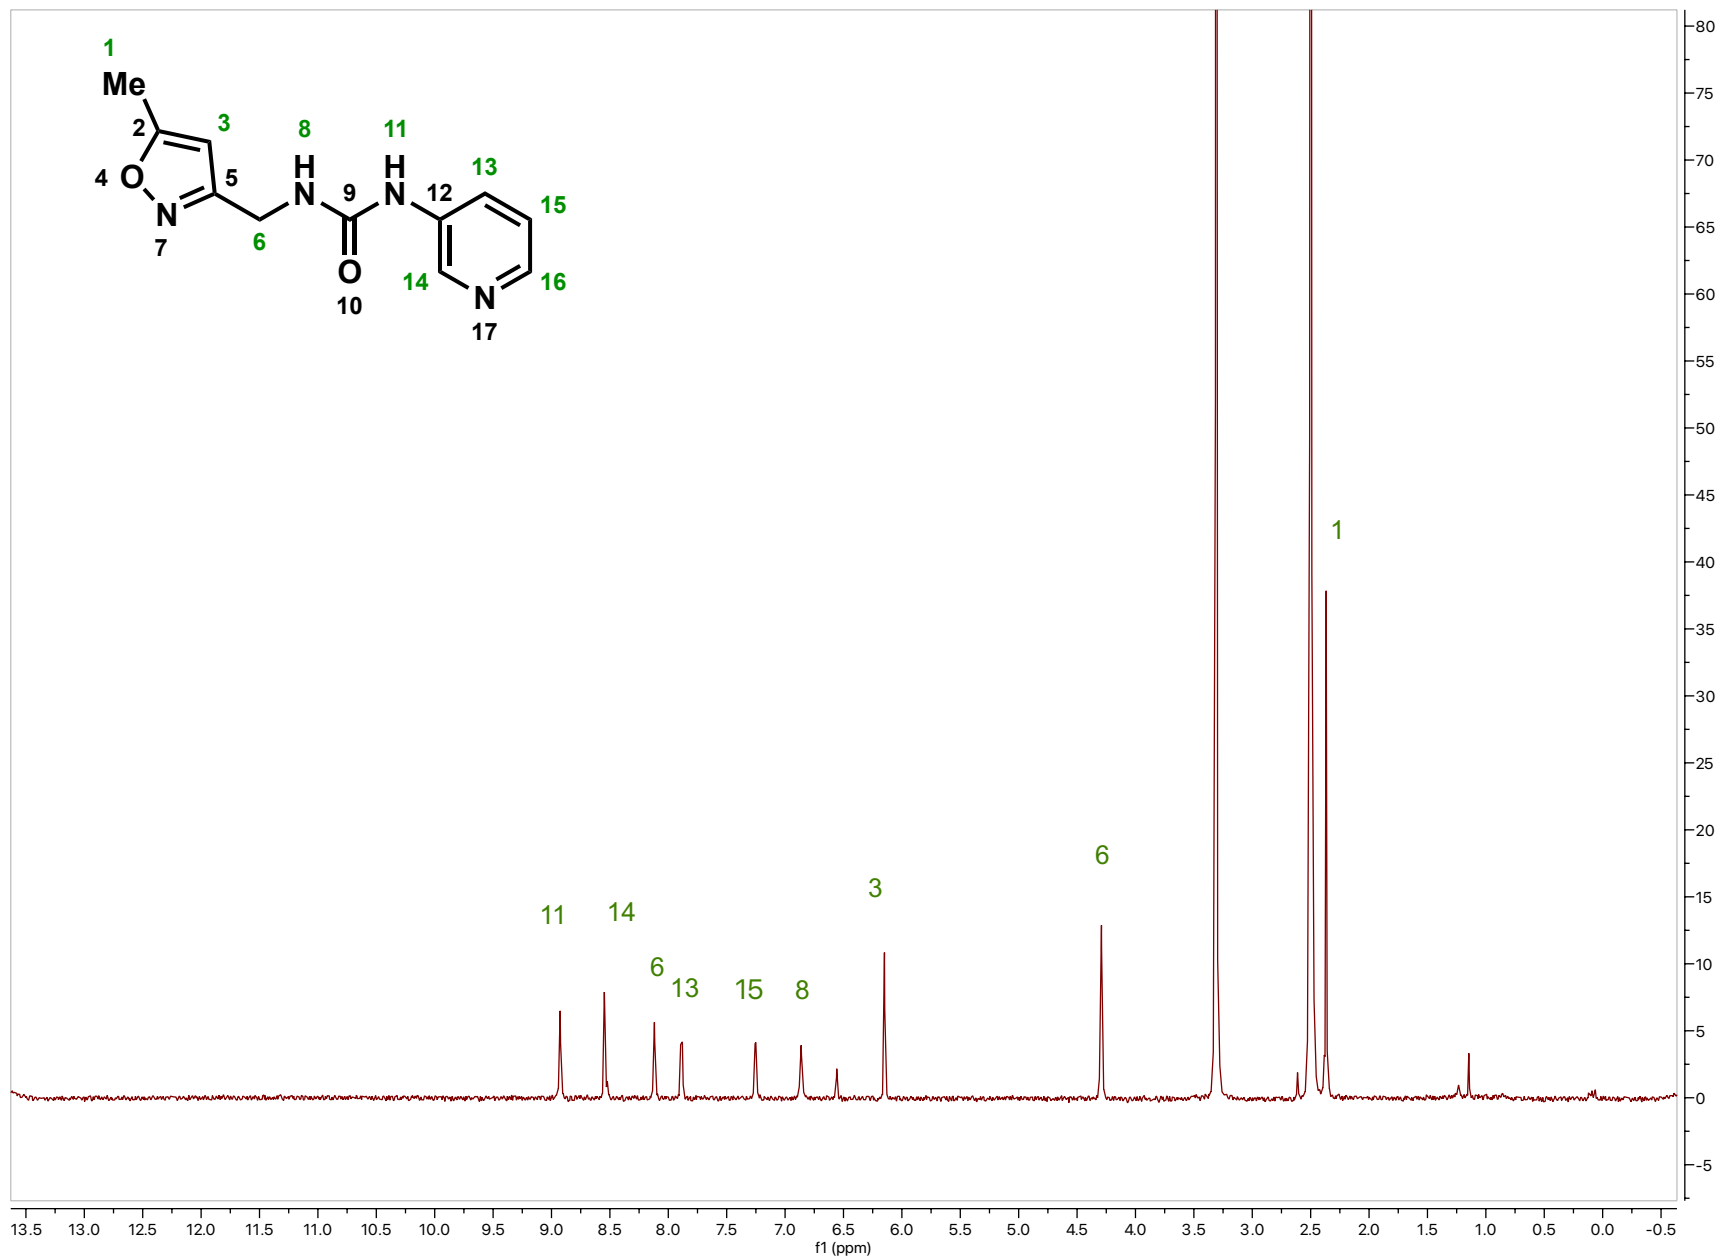

**Figure S7:** 600 MHz <sup>1</sup>H NMR spectrum for compound **6** in DMSO-d<sub>6</sub>. Green numbered atoms are atoms with a potential <sup>1</sup>H NMR signal. Green numbered peaks are mapped to their corresponding atom number.

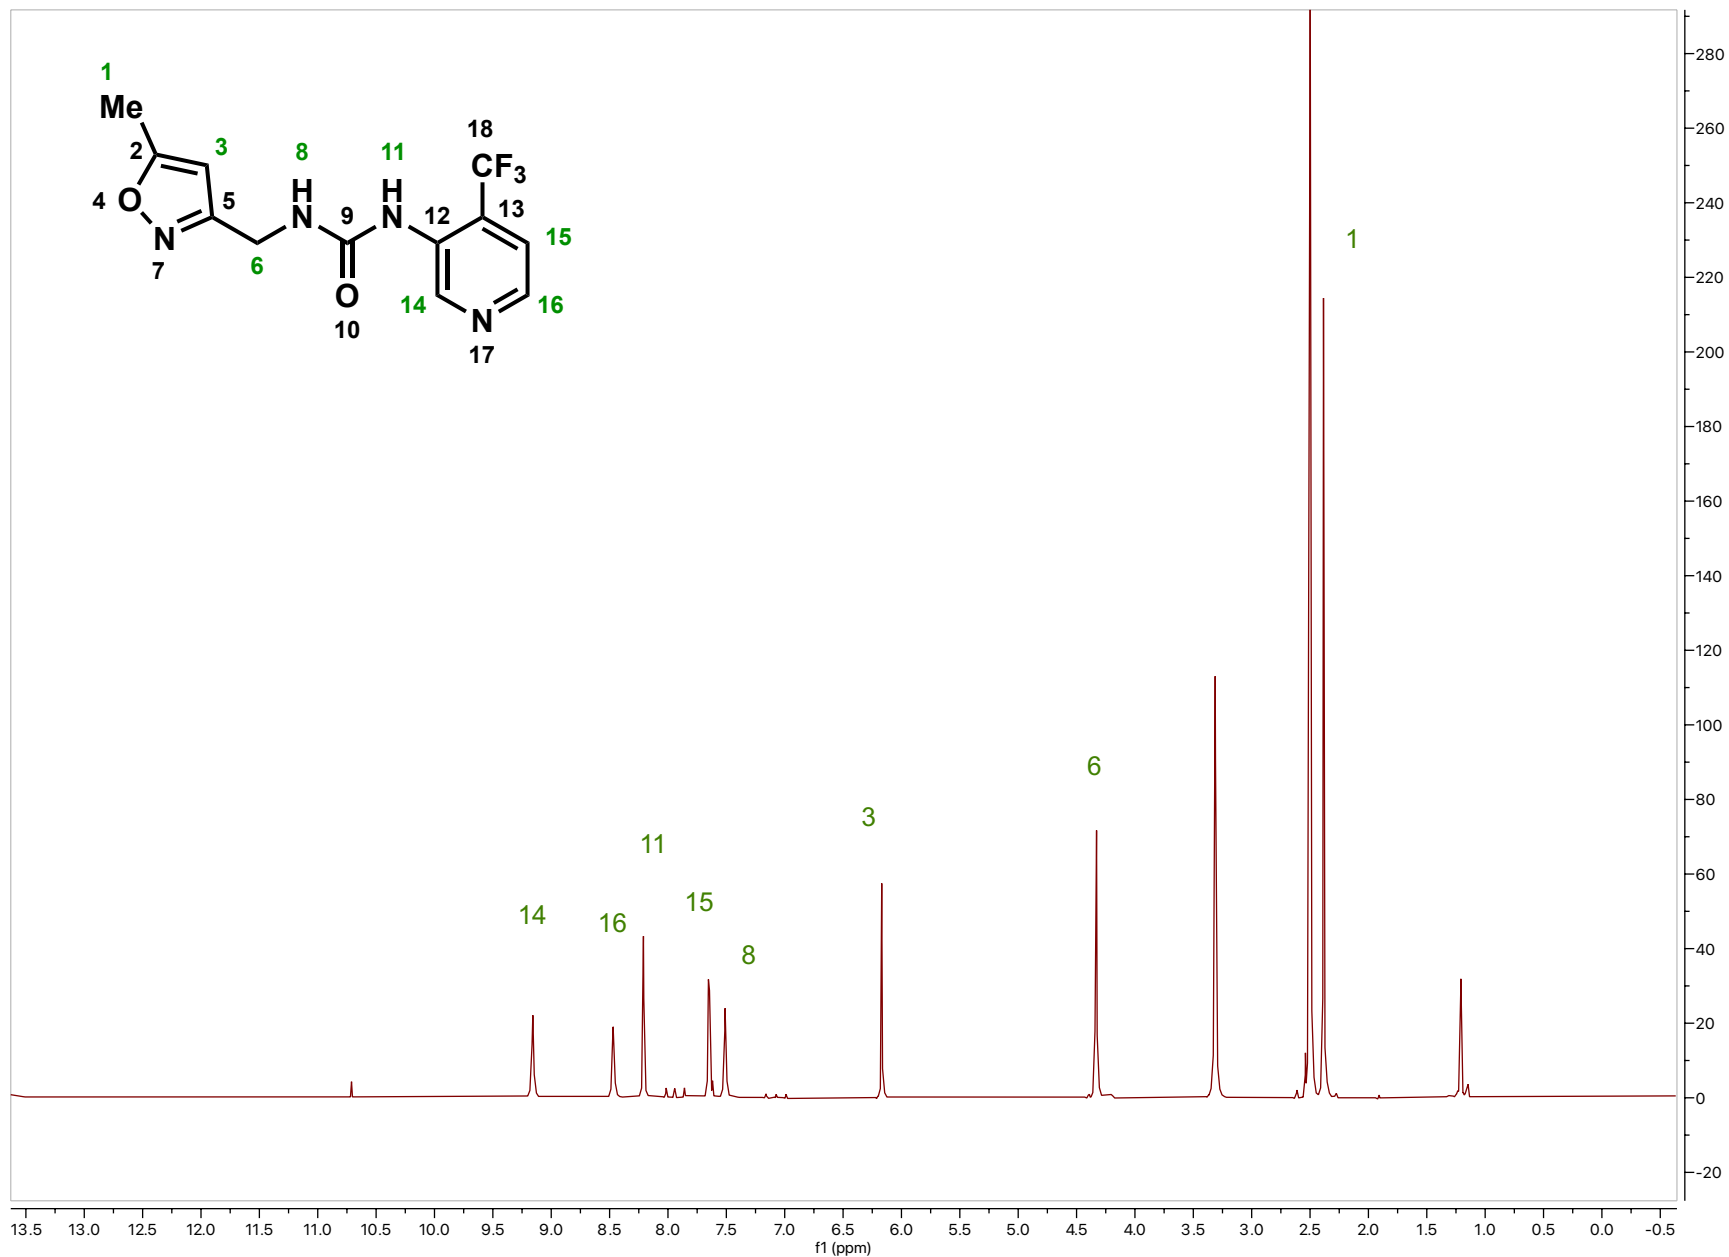

**Figure S8:** 600 MHz <sup>1</sup>H NMR spectrum for compound S1 in DMSO-d<sub>6</sub>. Green numbered atoms are atoms with a potential <sup>1</sup>H NMR signal. Green numbered peaks are mapped to their corresponding atom number.

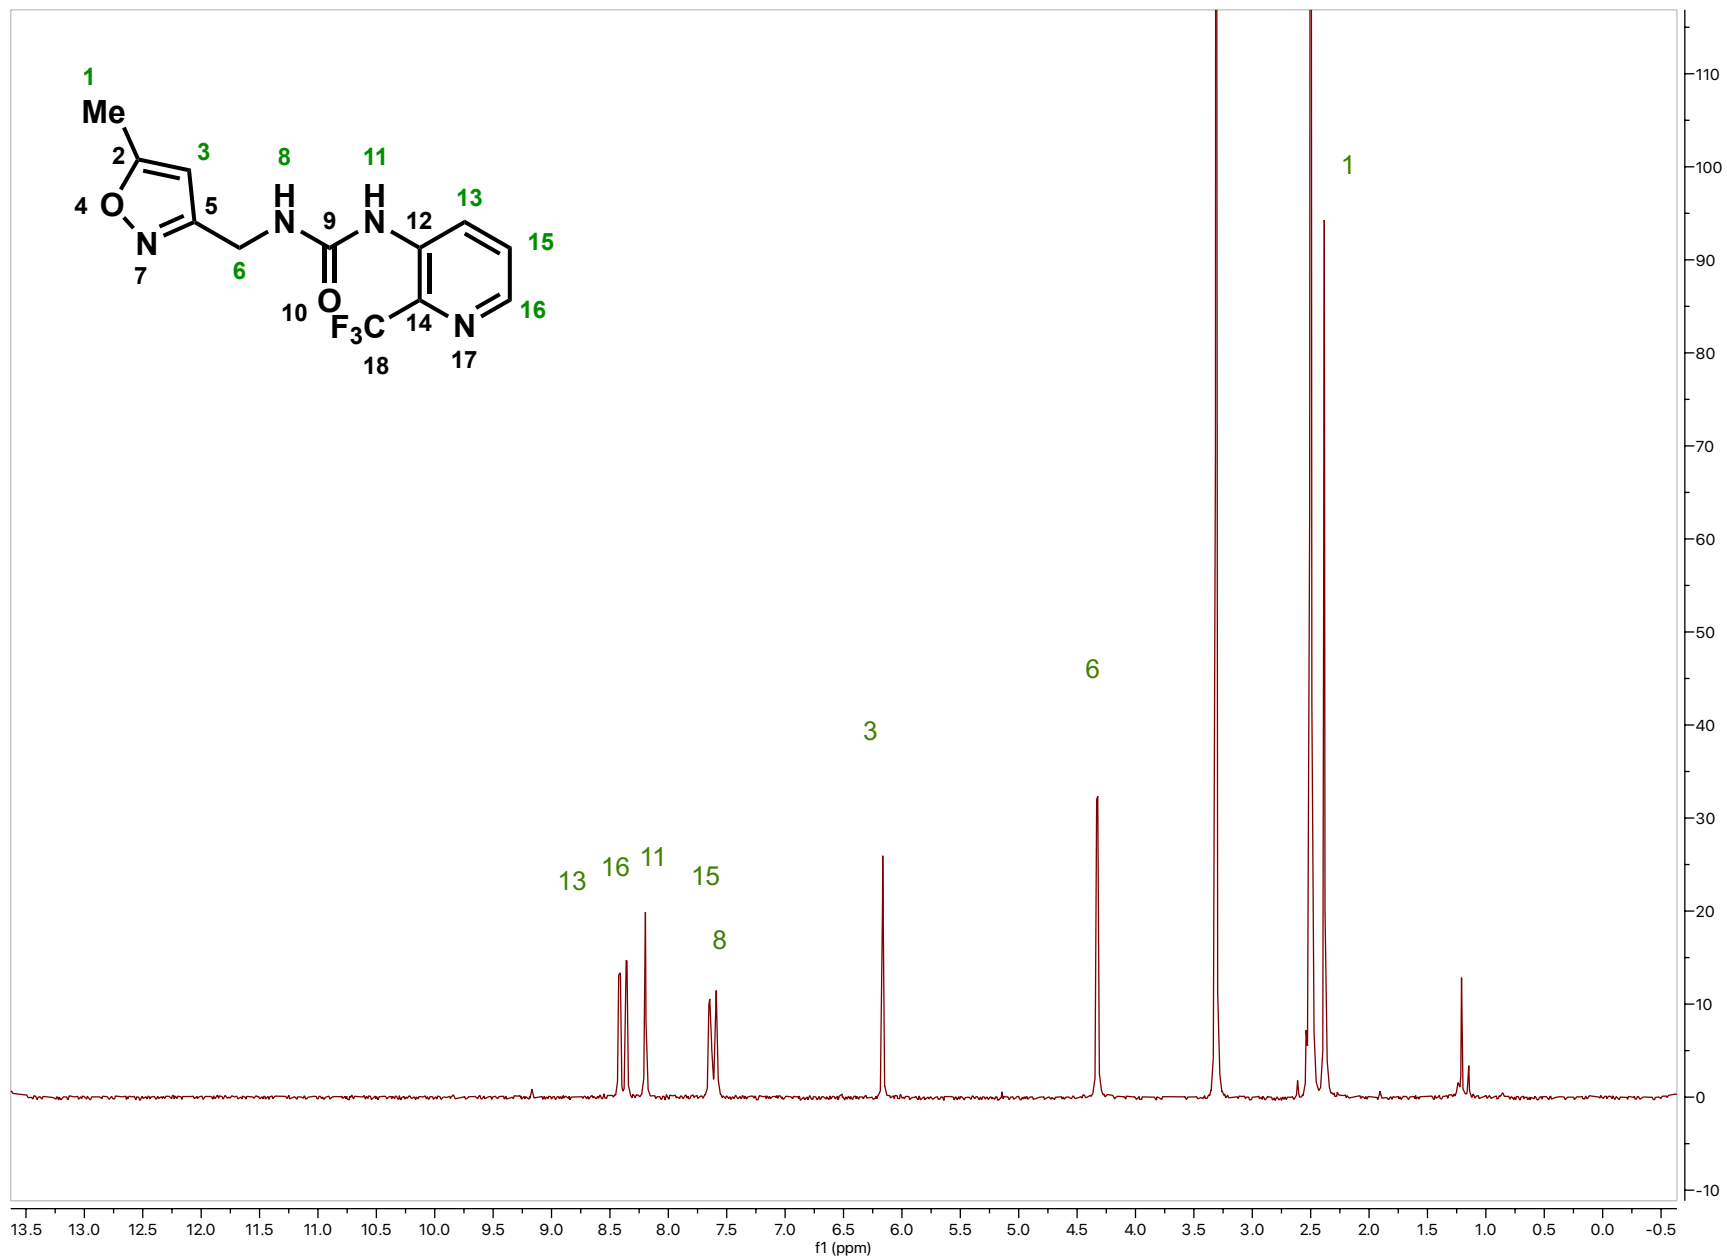

**Figure S9:** 600 MHz <sup>1</sup>H NMR spectrum for compound S2 in DMSO-d<sub>6</sub>. Green numbered atoms are atoms with a potential <sup>1</sup>H NMR signal. Green numbered peaks are mapped to their corresponding atom number.

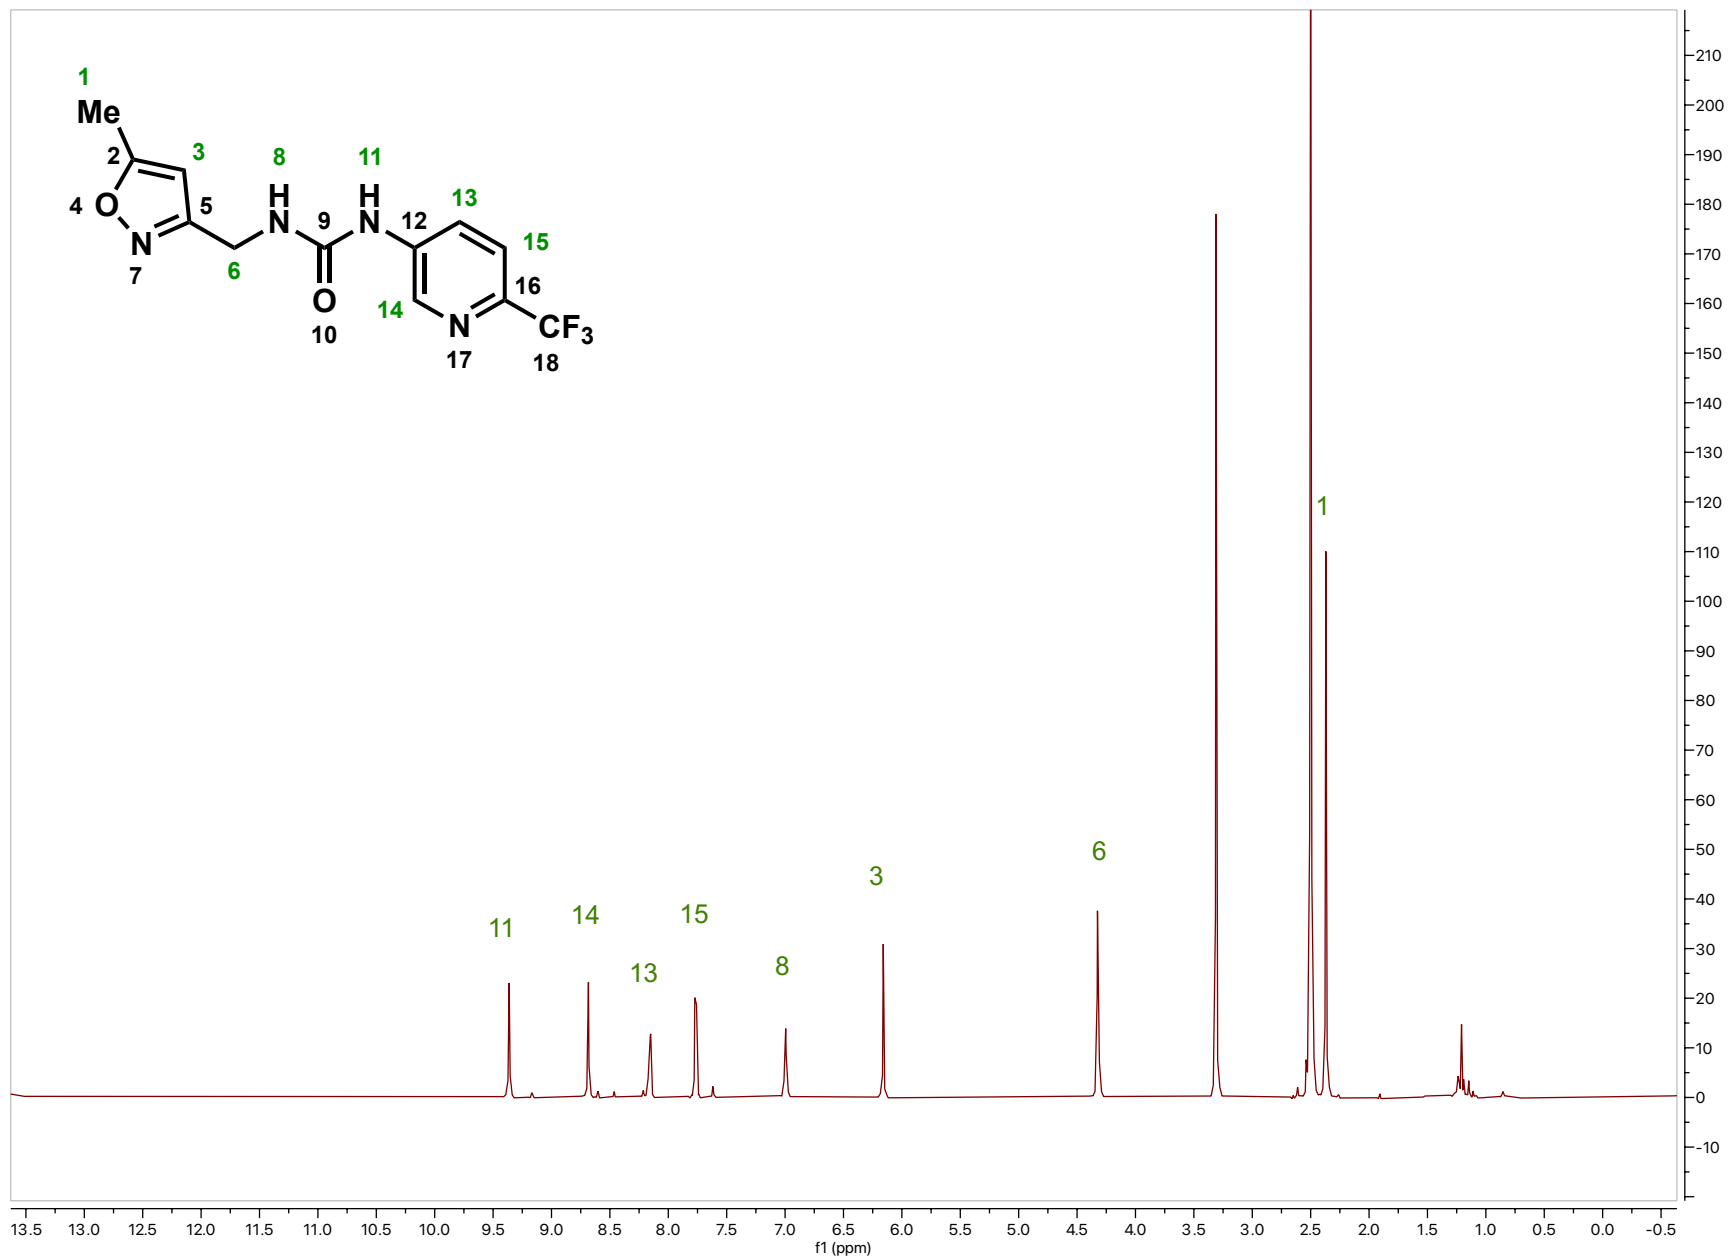

**Figure S10:** 600 MHz <sup>1</sup>H NMR spectrum for compound S3 in DMSO-d<sub>6</sub>. Green numbered atoms are atoms with a potential <sup>1</sup>H NMR signal. Green numbered peaks are mapped to their corresponding atom number.

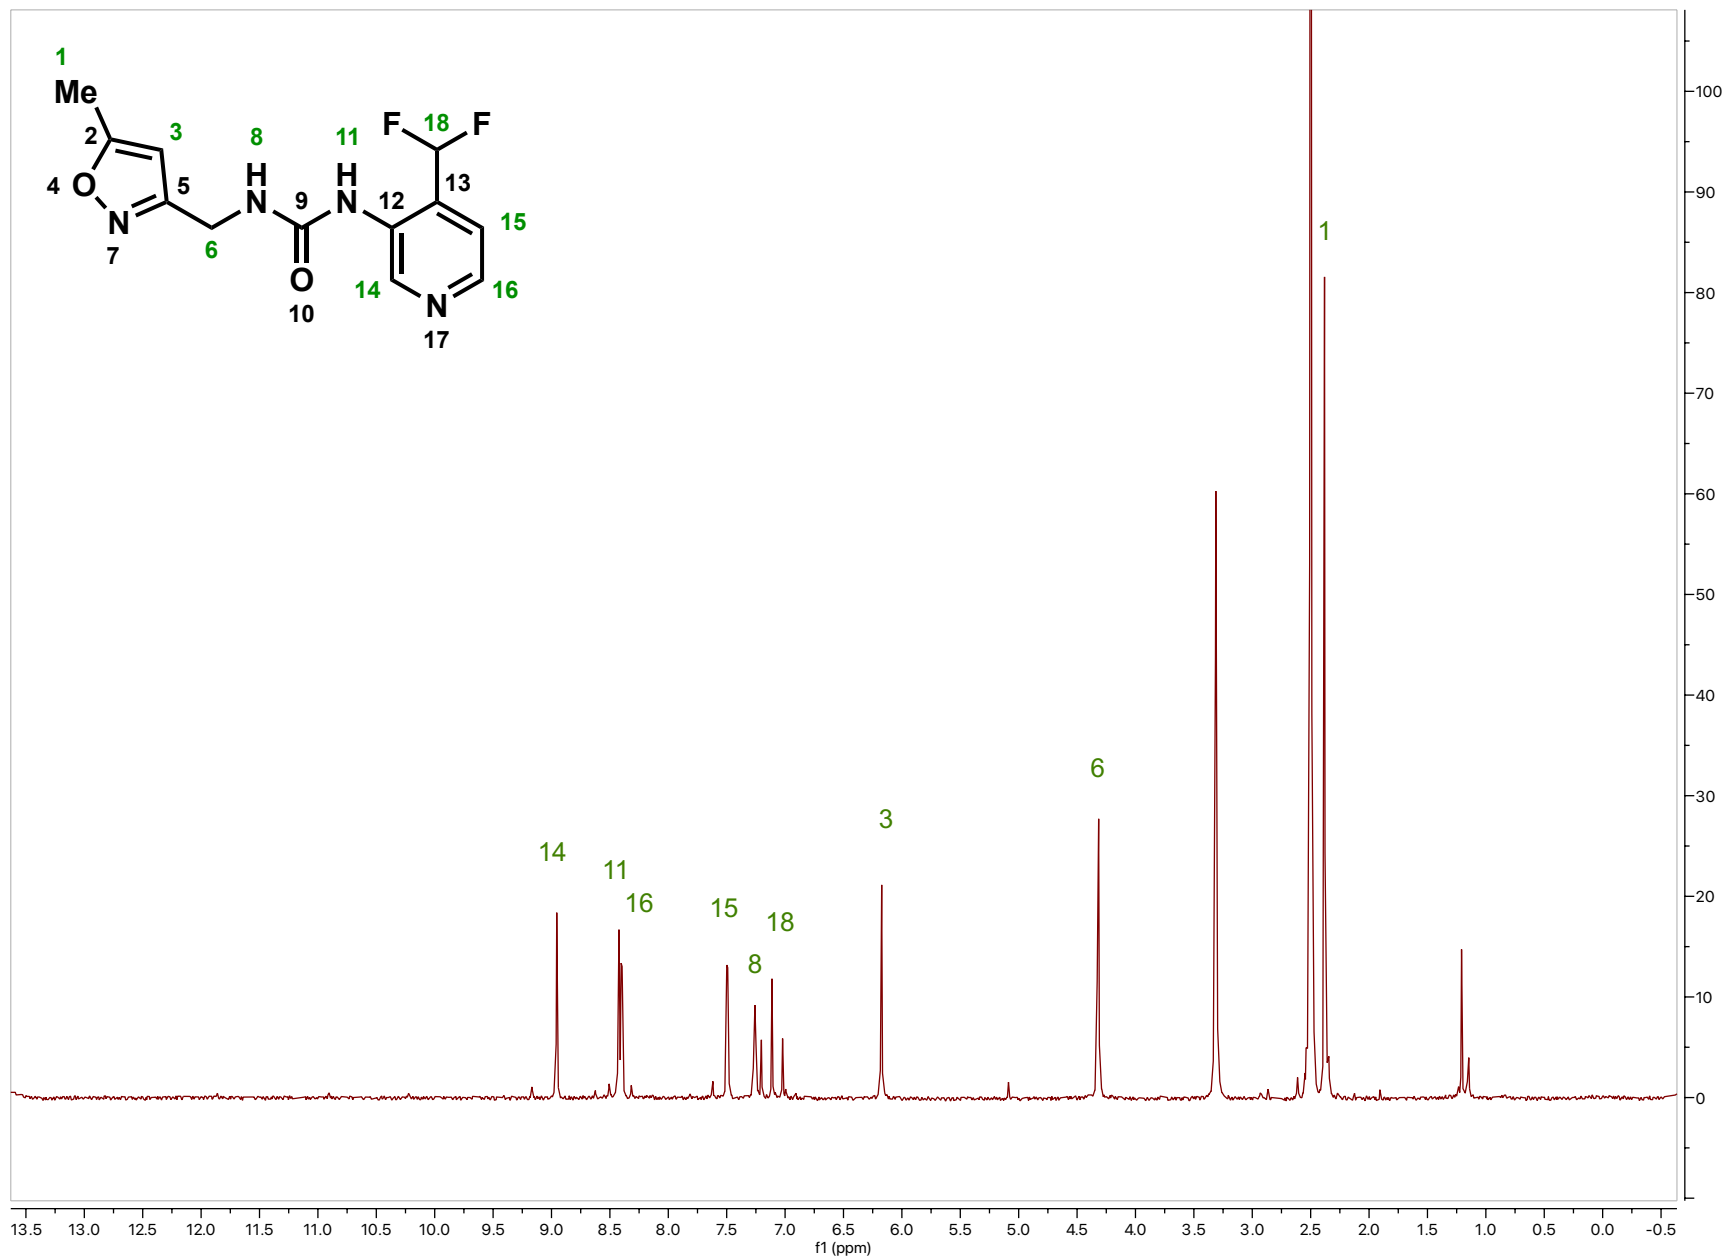

**Figure S11:** 600 MHz <sup>1</sup>H NMR spectrum for compound S4 in DMSO-d<sub>6</sub>. Green numbered atoms are atoms with a potential <sup>1</sup>H NMR signal. Green numbered peaks are mapped to their corresponding atom number.

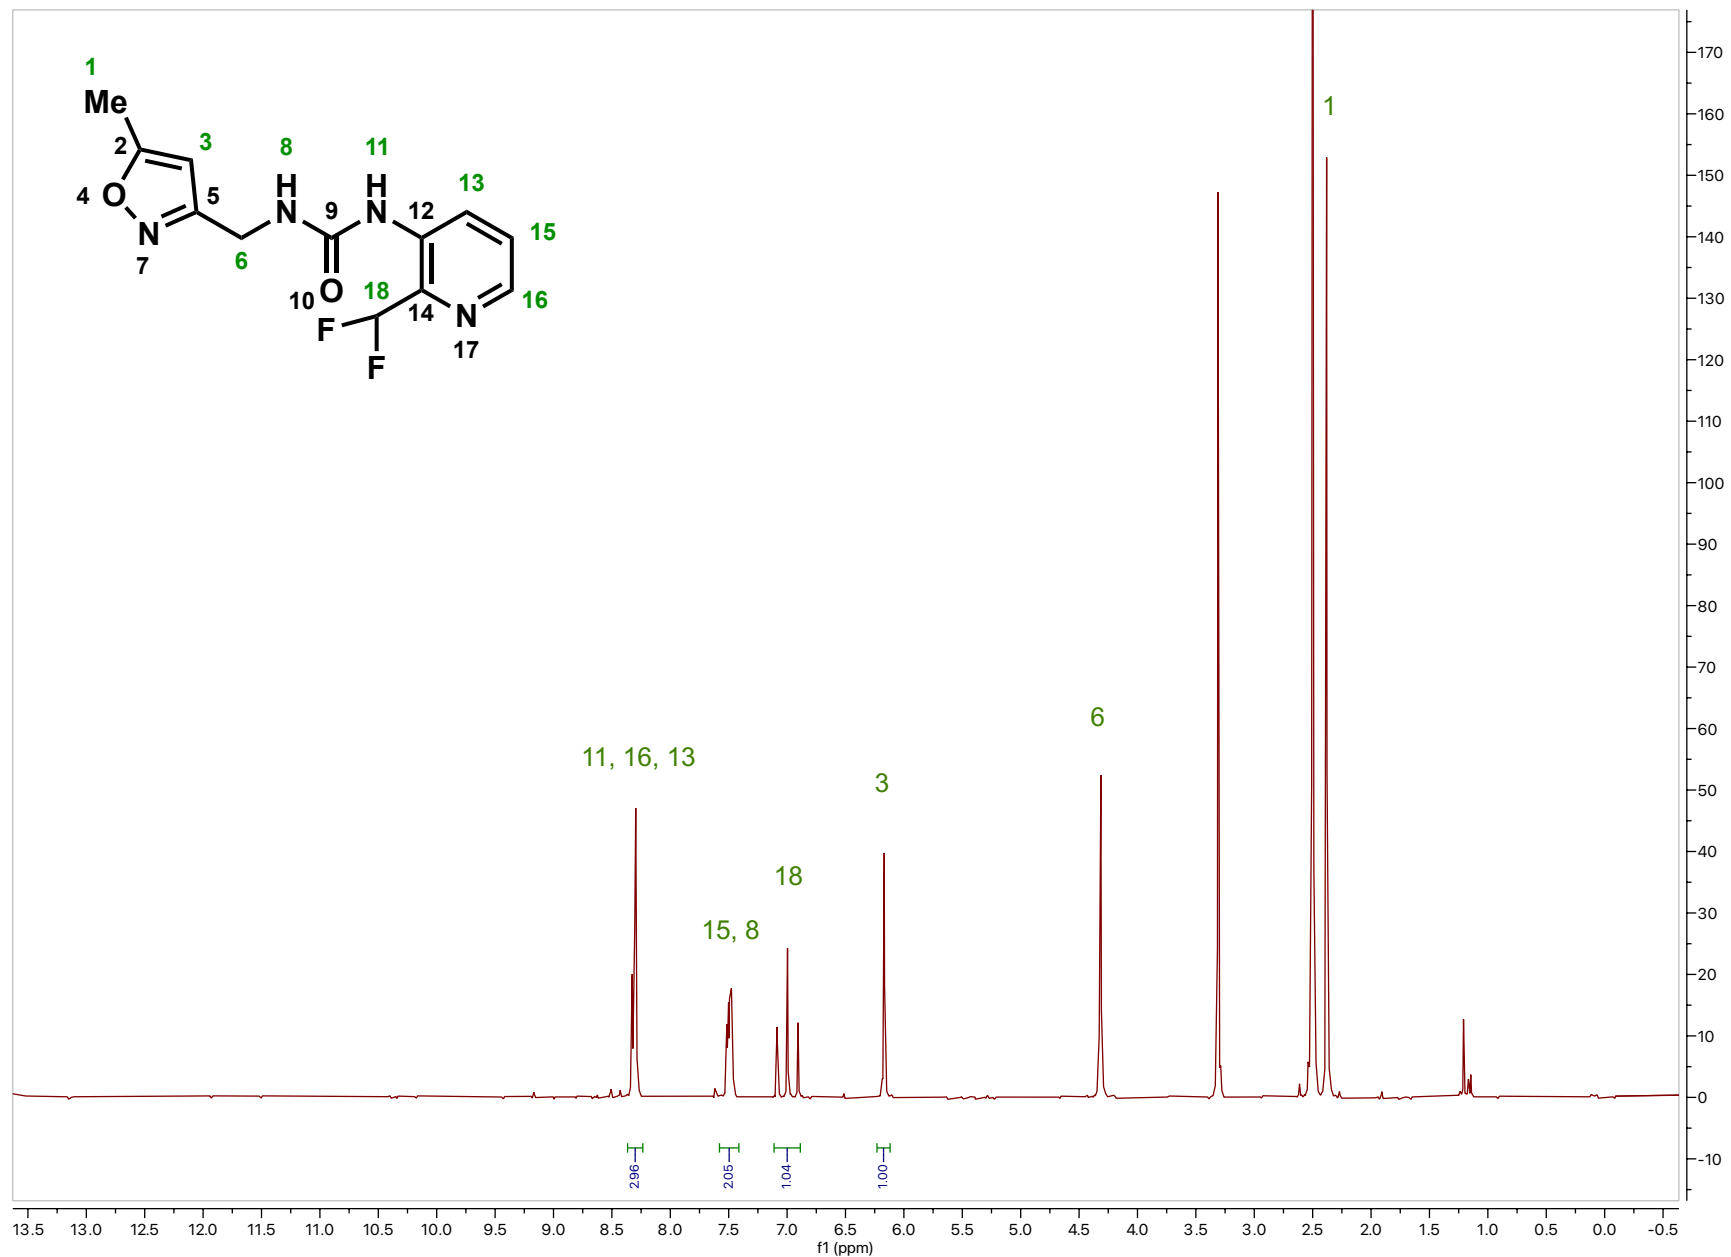

**Figure S12:** 600 MHz <sup>1</sup>H NMR spectrum for compound S5 in DMSO-d<sub>6</sub>. Green numbered atoms are atoms with a potential <sup>1</sup>H NMR signal. Green numbered peaks are mapped to their corresponding atom number.



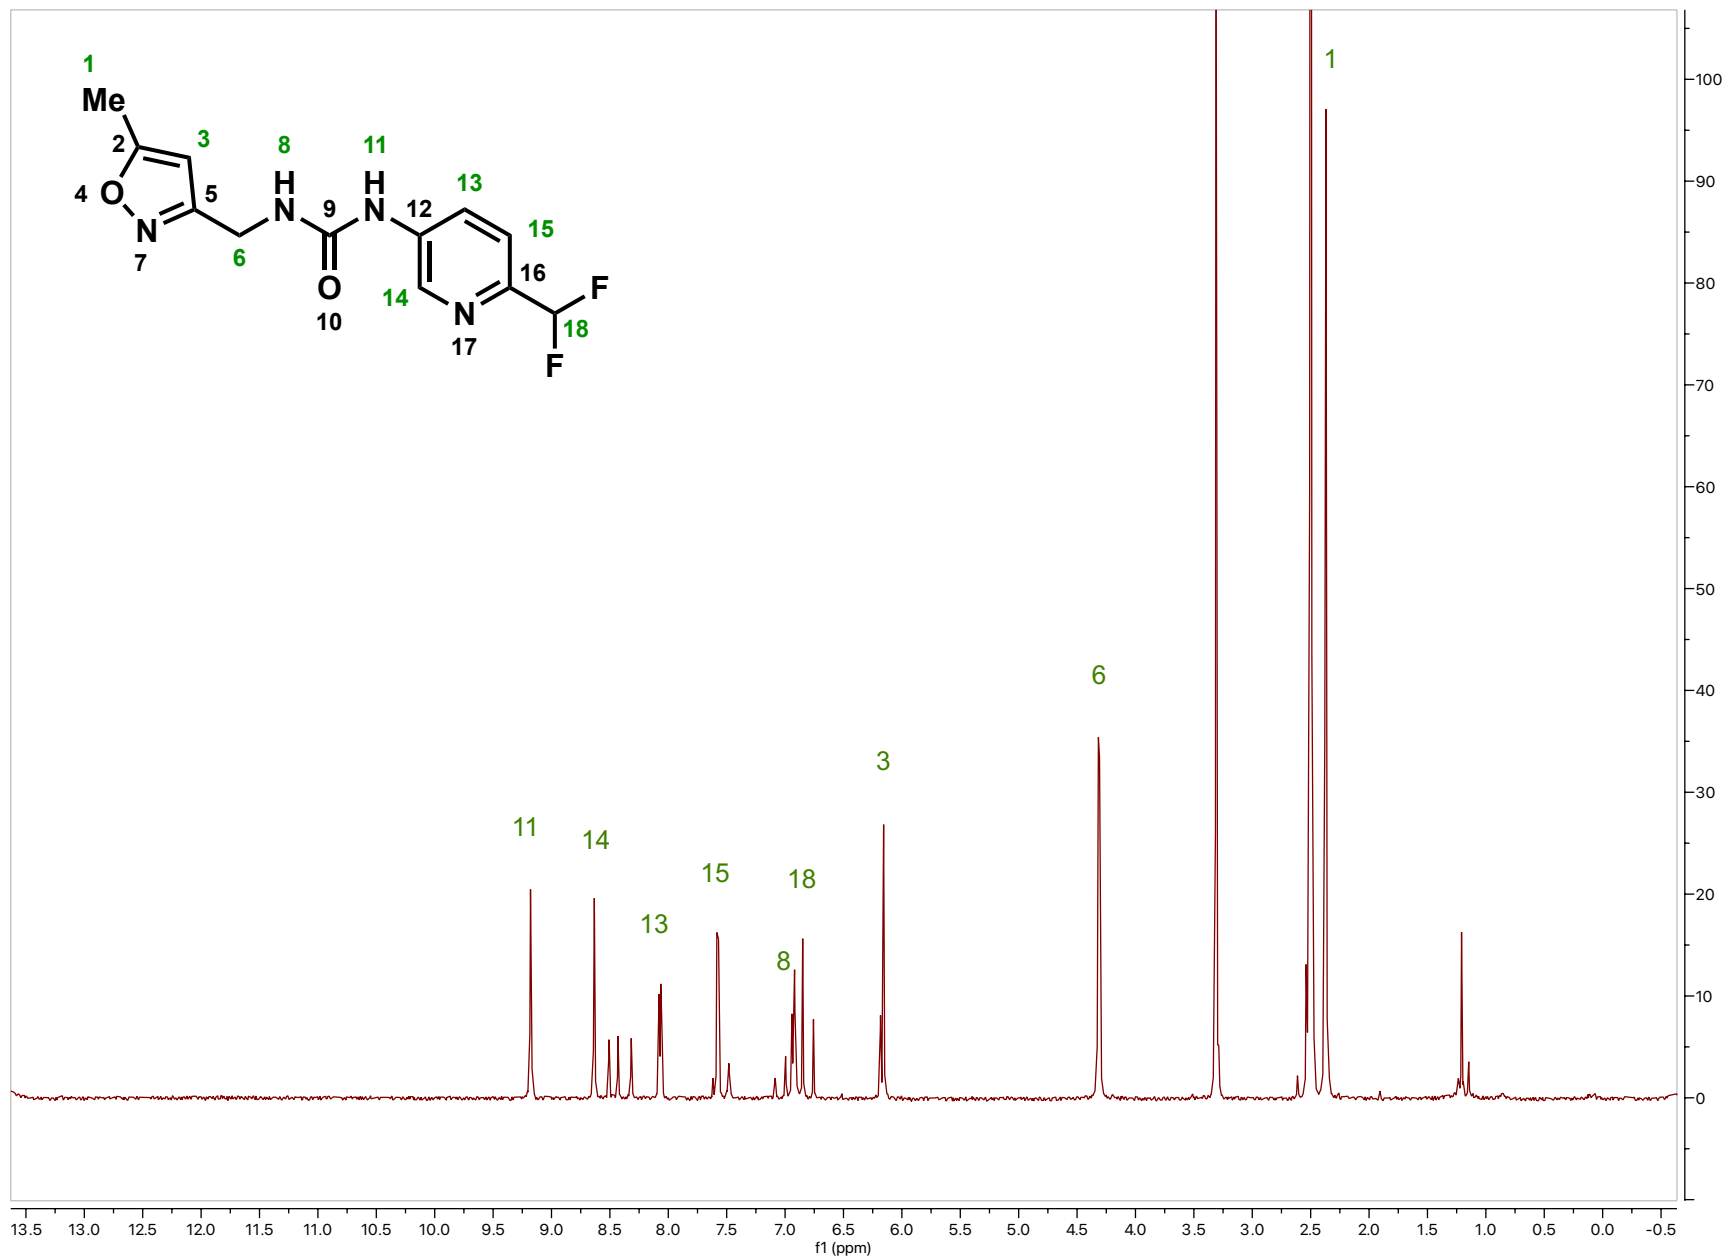

**Figure S13:** 600 MHz <sup>1</sup>H NMR spectrum for compound S6 in DMSO-d<sub>6</sub>. Green numbered atoms are atoms with a potential <sup>1</sup>H NMR signal. Green numbered peaks are mapped to their corresponding atom number.

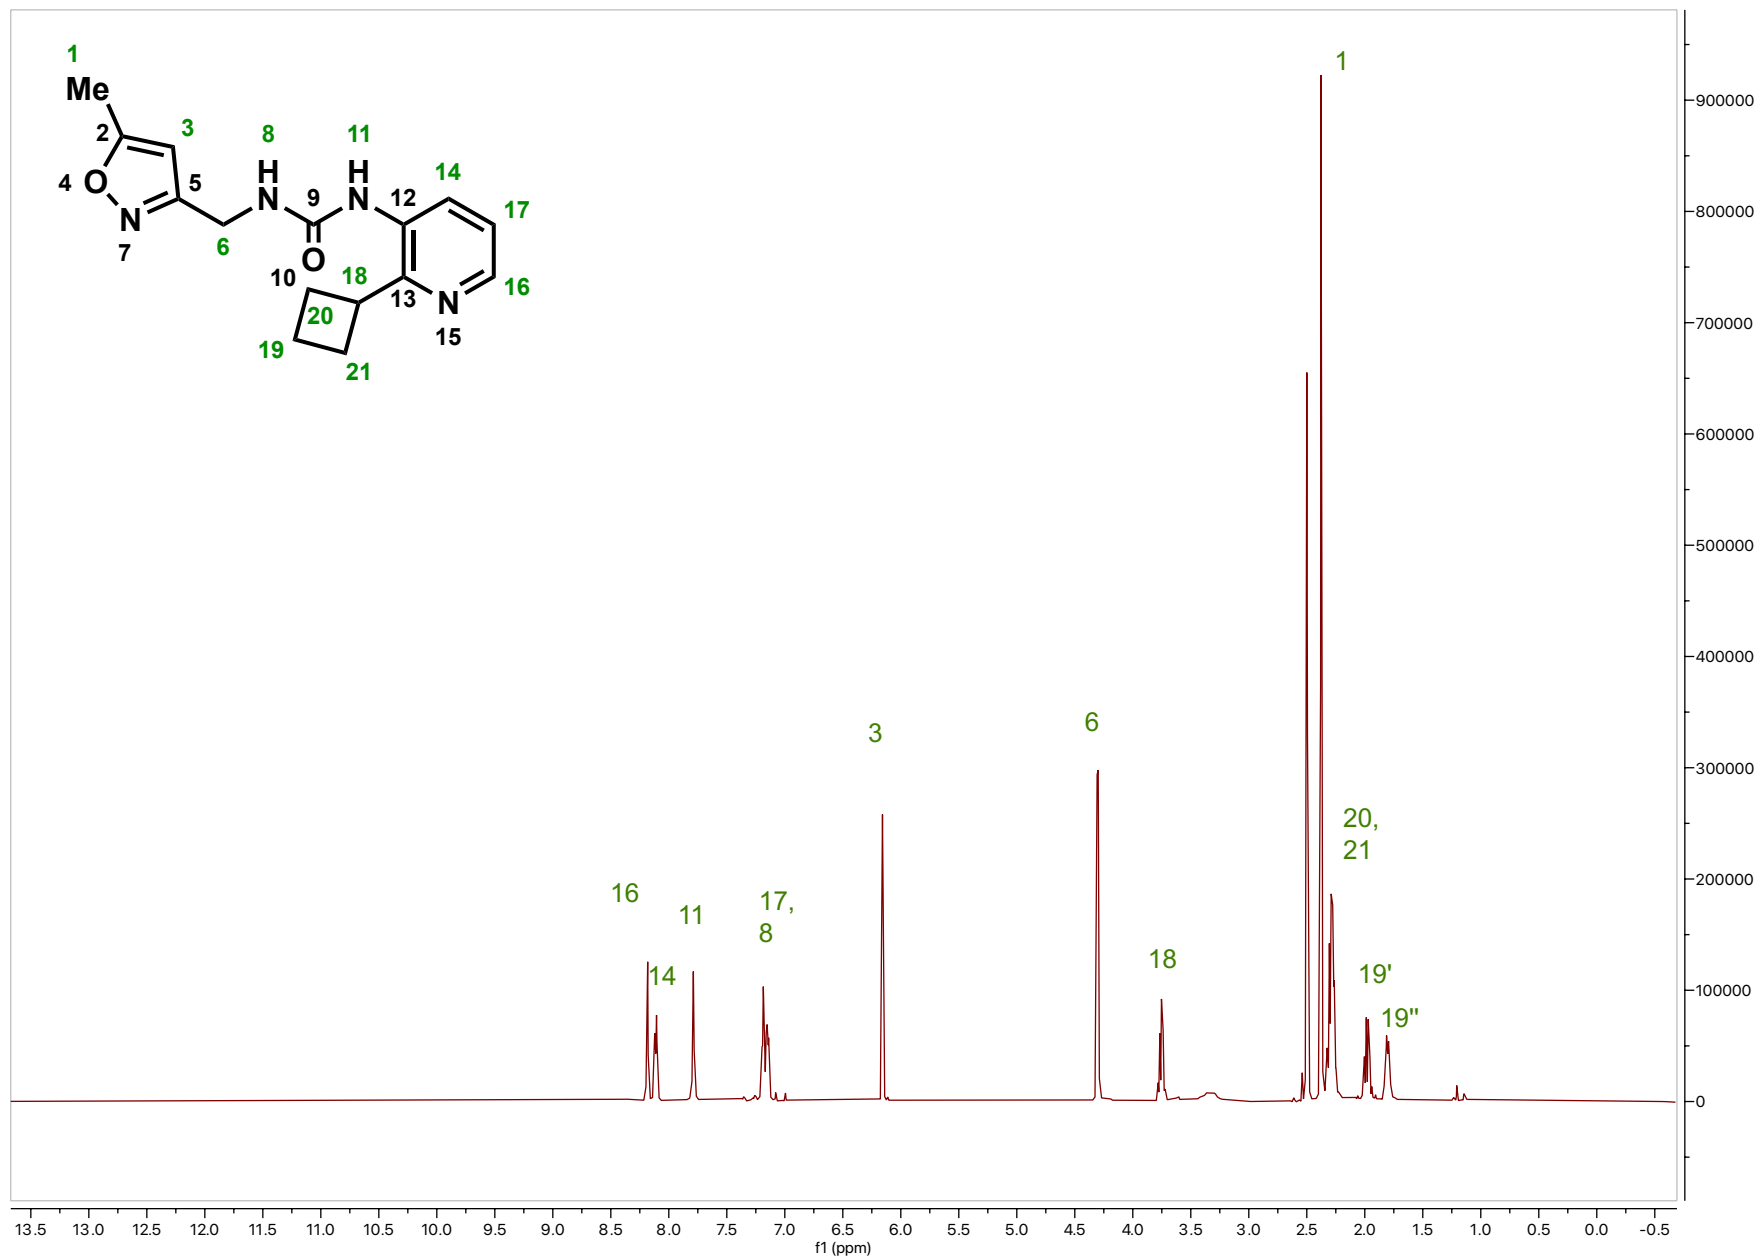

**Figure S14:** 600 MHz <sup>1</sup>H NMR spectrum for compound S7 in DMSO-d<sub>6</sub>. Green numbered atoms are atoms with a potential <sup>1</sup>H NMR signal. Green numbered peaks are mapped to their corresponding atom number.

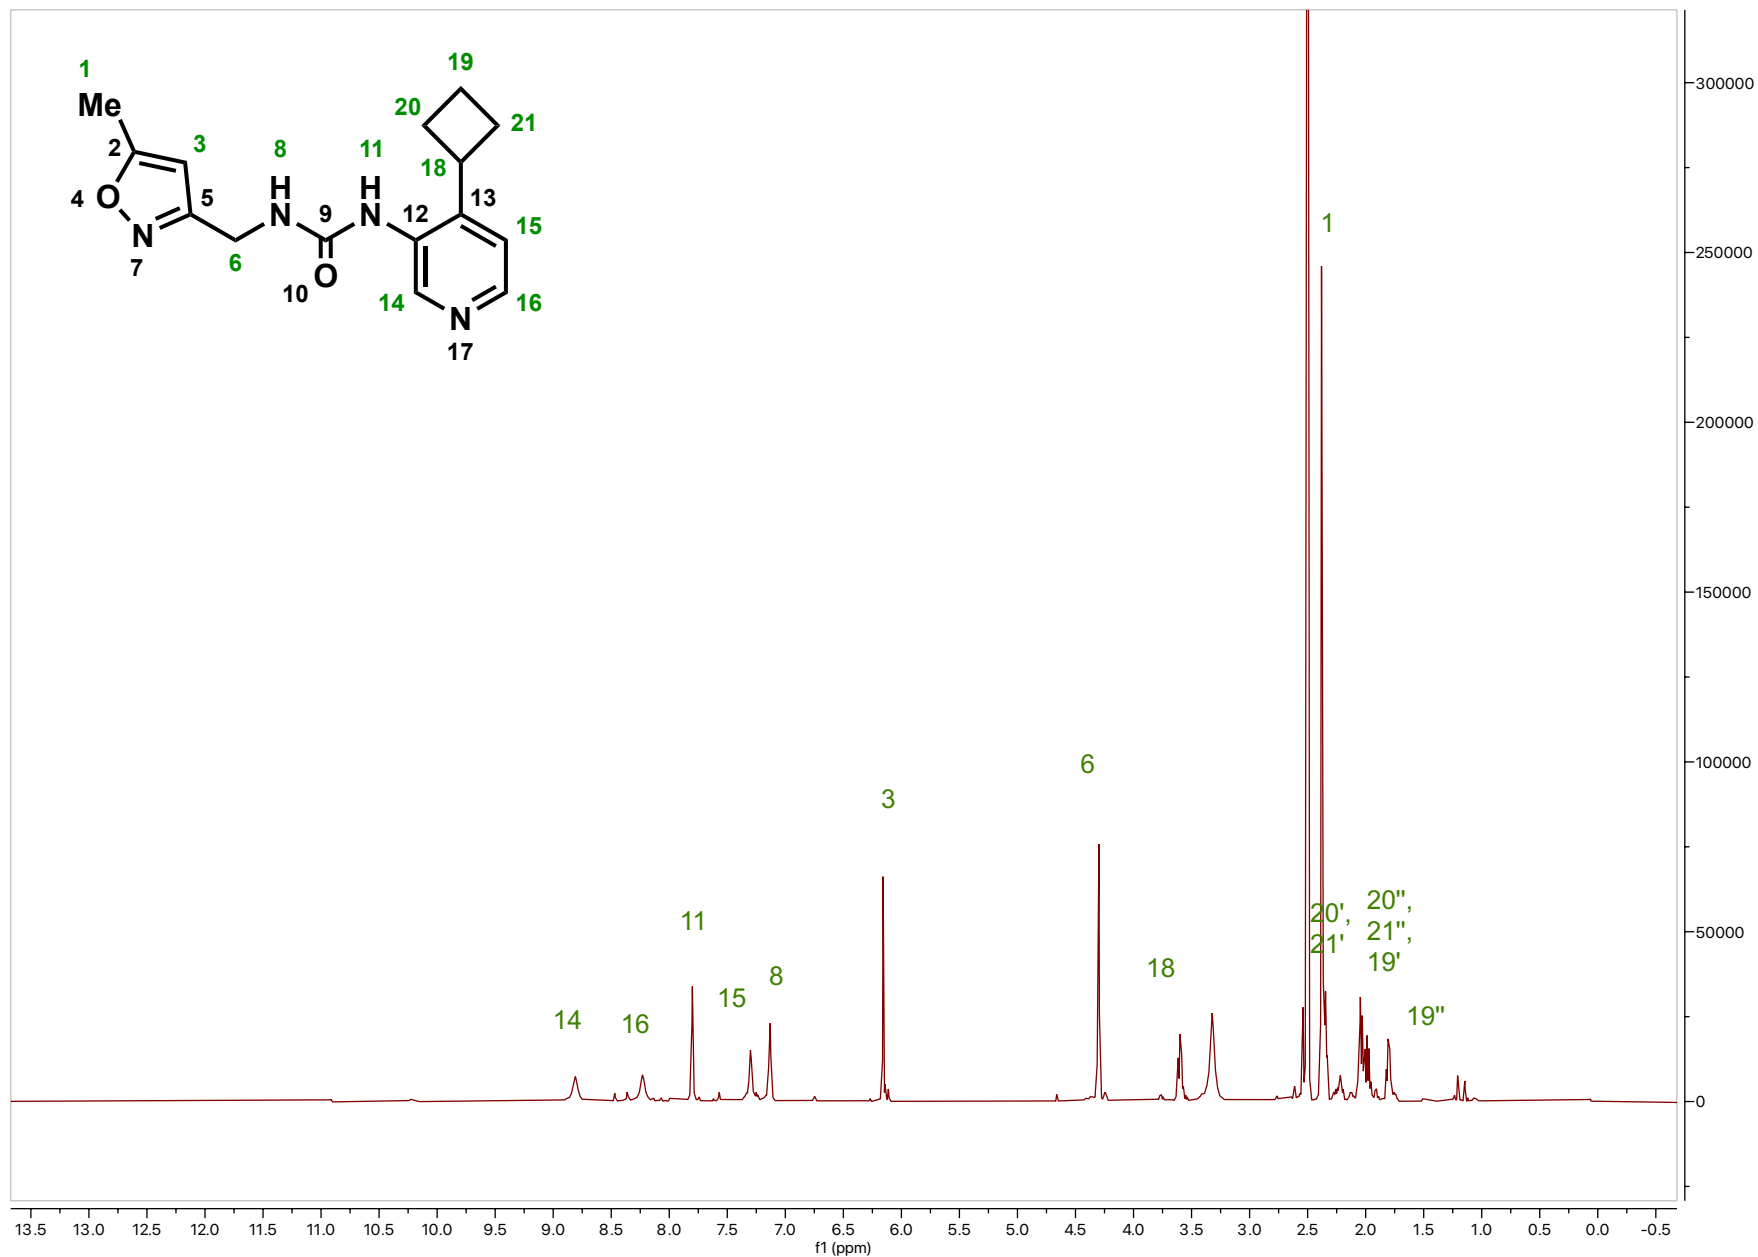

**Figure S15:** 600 MHz <sup>1</sup>H NMR spectrum for compound **S8** in DMSO-d<sub>6</sub>. Green numbered atoms are atoms with a potential <sup>1</sup>H NMR signal. Green numbered peaks are mapped to their corresponding atom number.

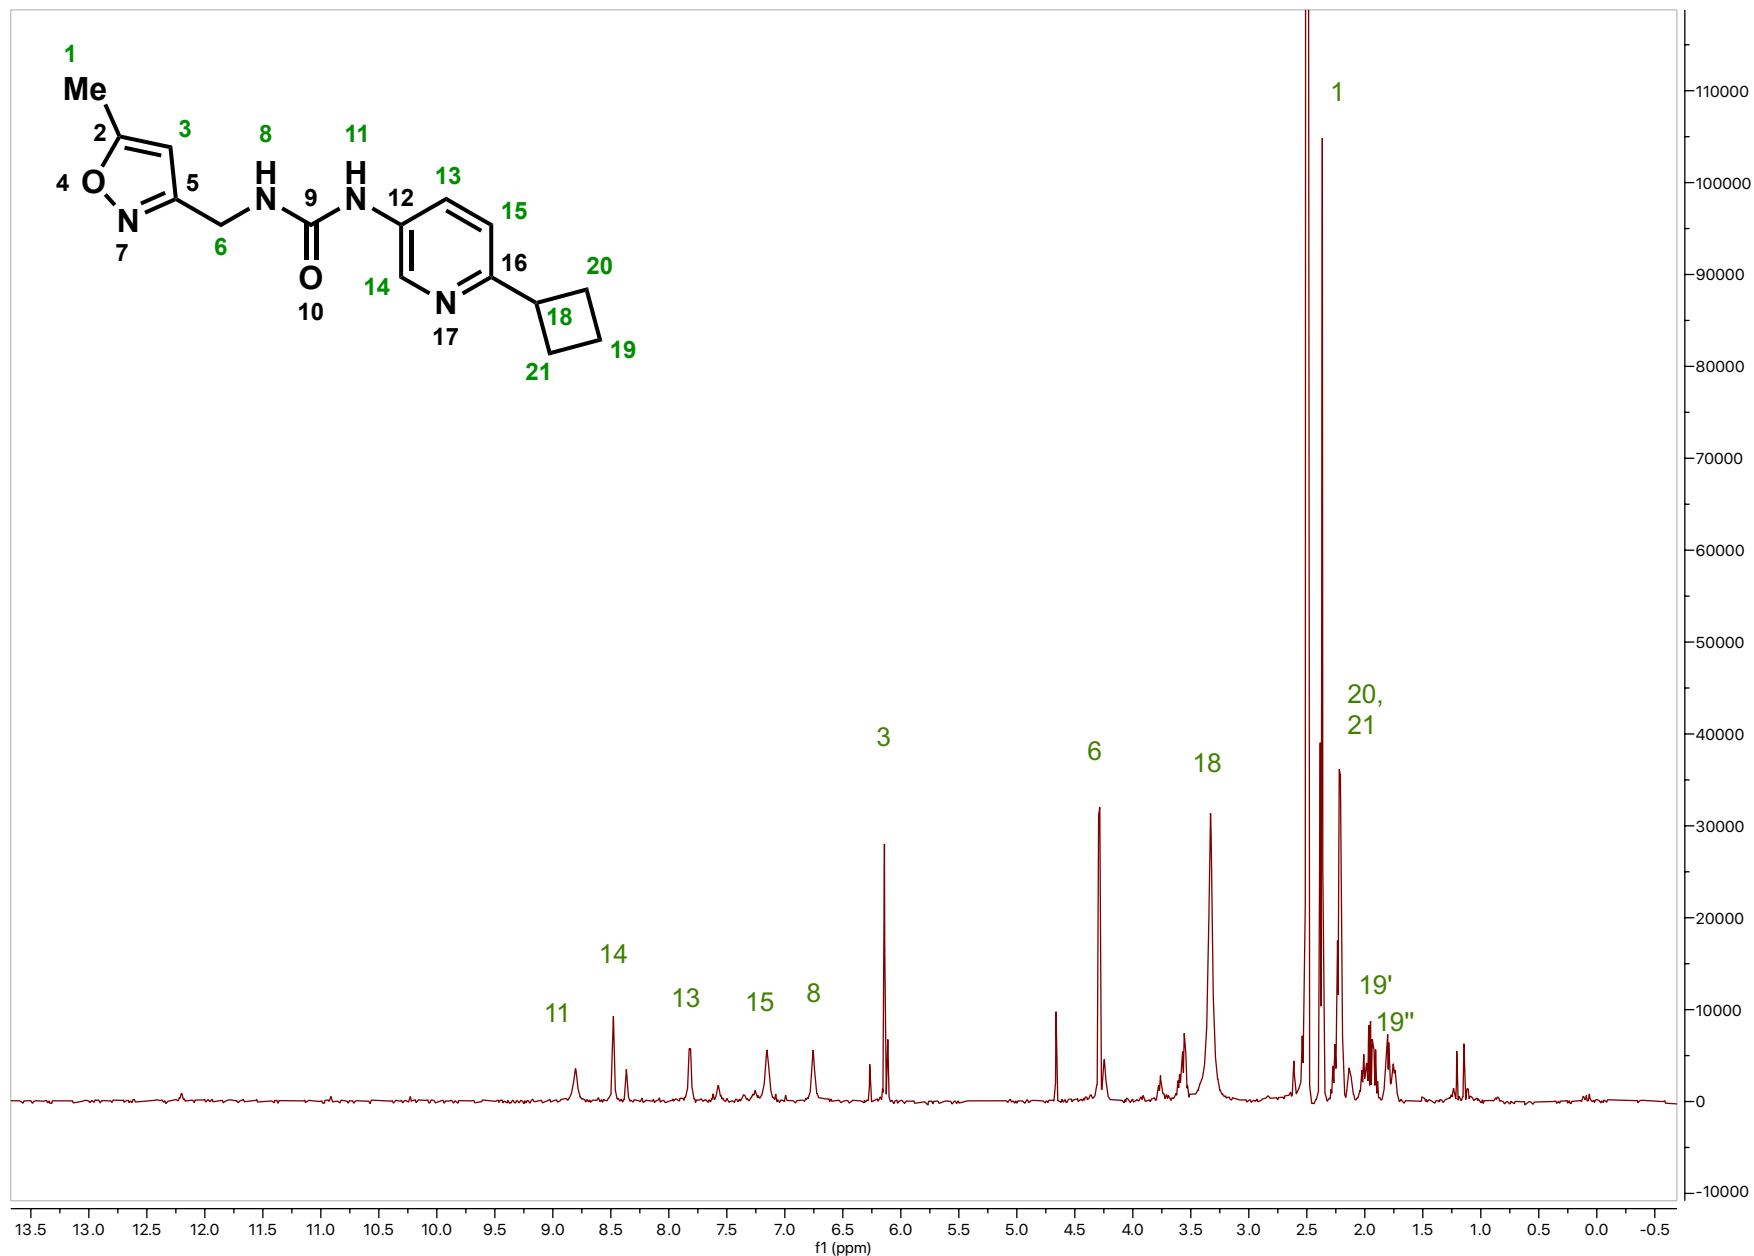

**Figure S16:** 600 MHz <sup>1</sup>H NMR spectrum for compound S9 in DMSO-d<sub>6</sub>. Green numbered atoms are atoms with a potential <sup>1</sup>H NMR signal. Green numbered peaks are mapped to their corresponding atom number.

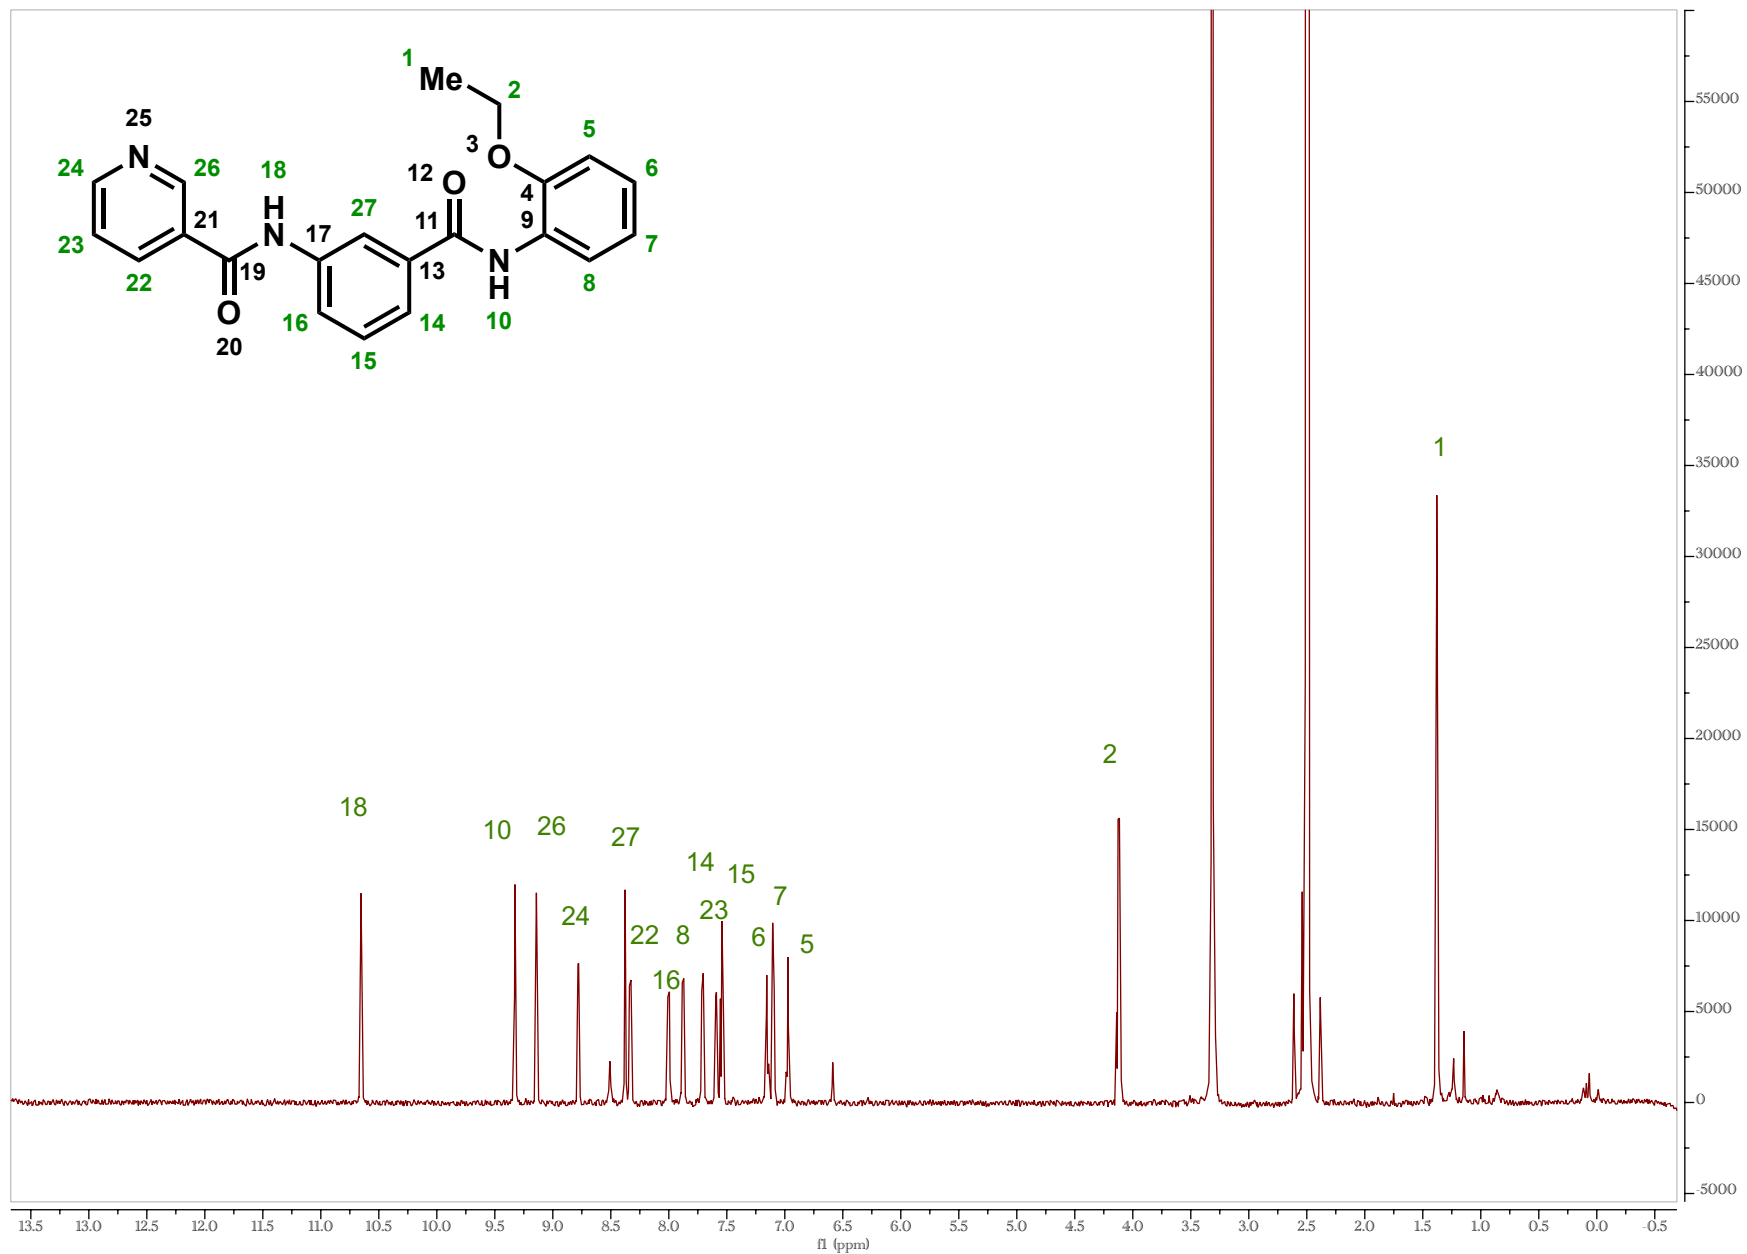

**Figure S17:** 600 MHz <sup>1</sup>H NMR spectrum for compound 7 in DMSO-d<sub>6</sub>. Green numbered atoms are atoms with a potential <sup>1</sup>H NMR signal. Green numbered peaks are mapped to their corresponding atom number.

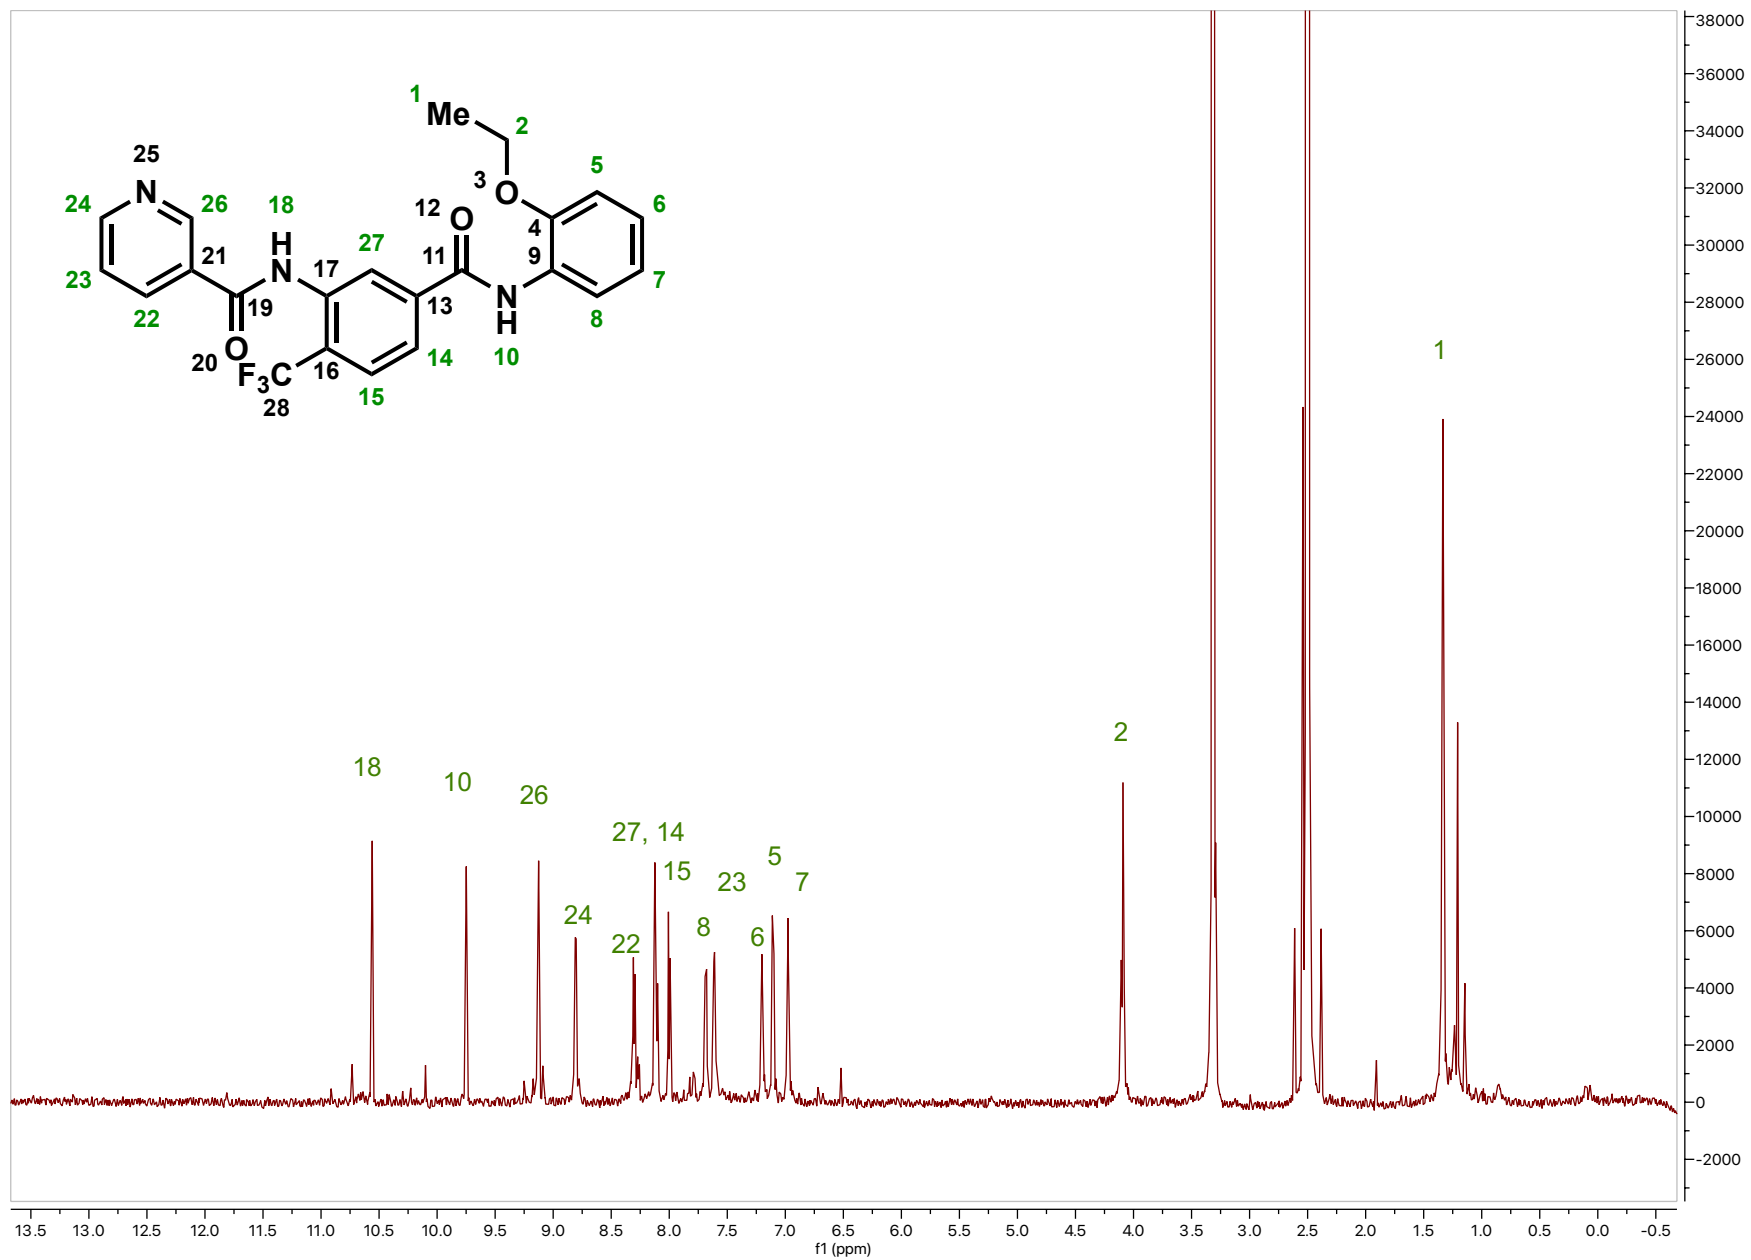

**Figure S18:** 600 MHz <sup>1</sup>H NMR spectrum for compound **S10** in DMSO-d<sub>6</sub>. Green numbered atoms are atoms with a potential <sup>1</sup>H NMR signal. Green numbered peaks are mapped to their corresponding atom number.

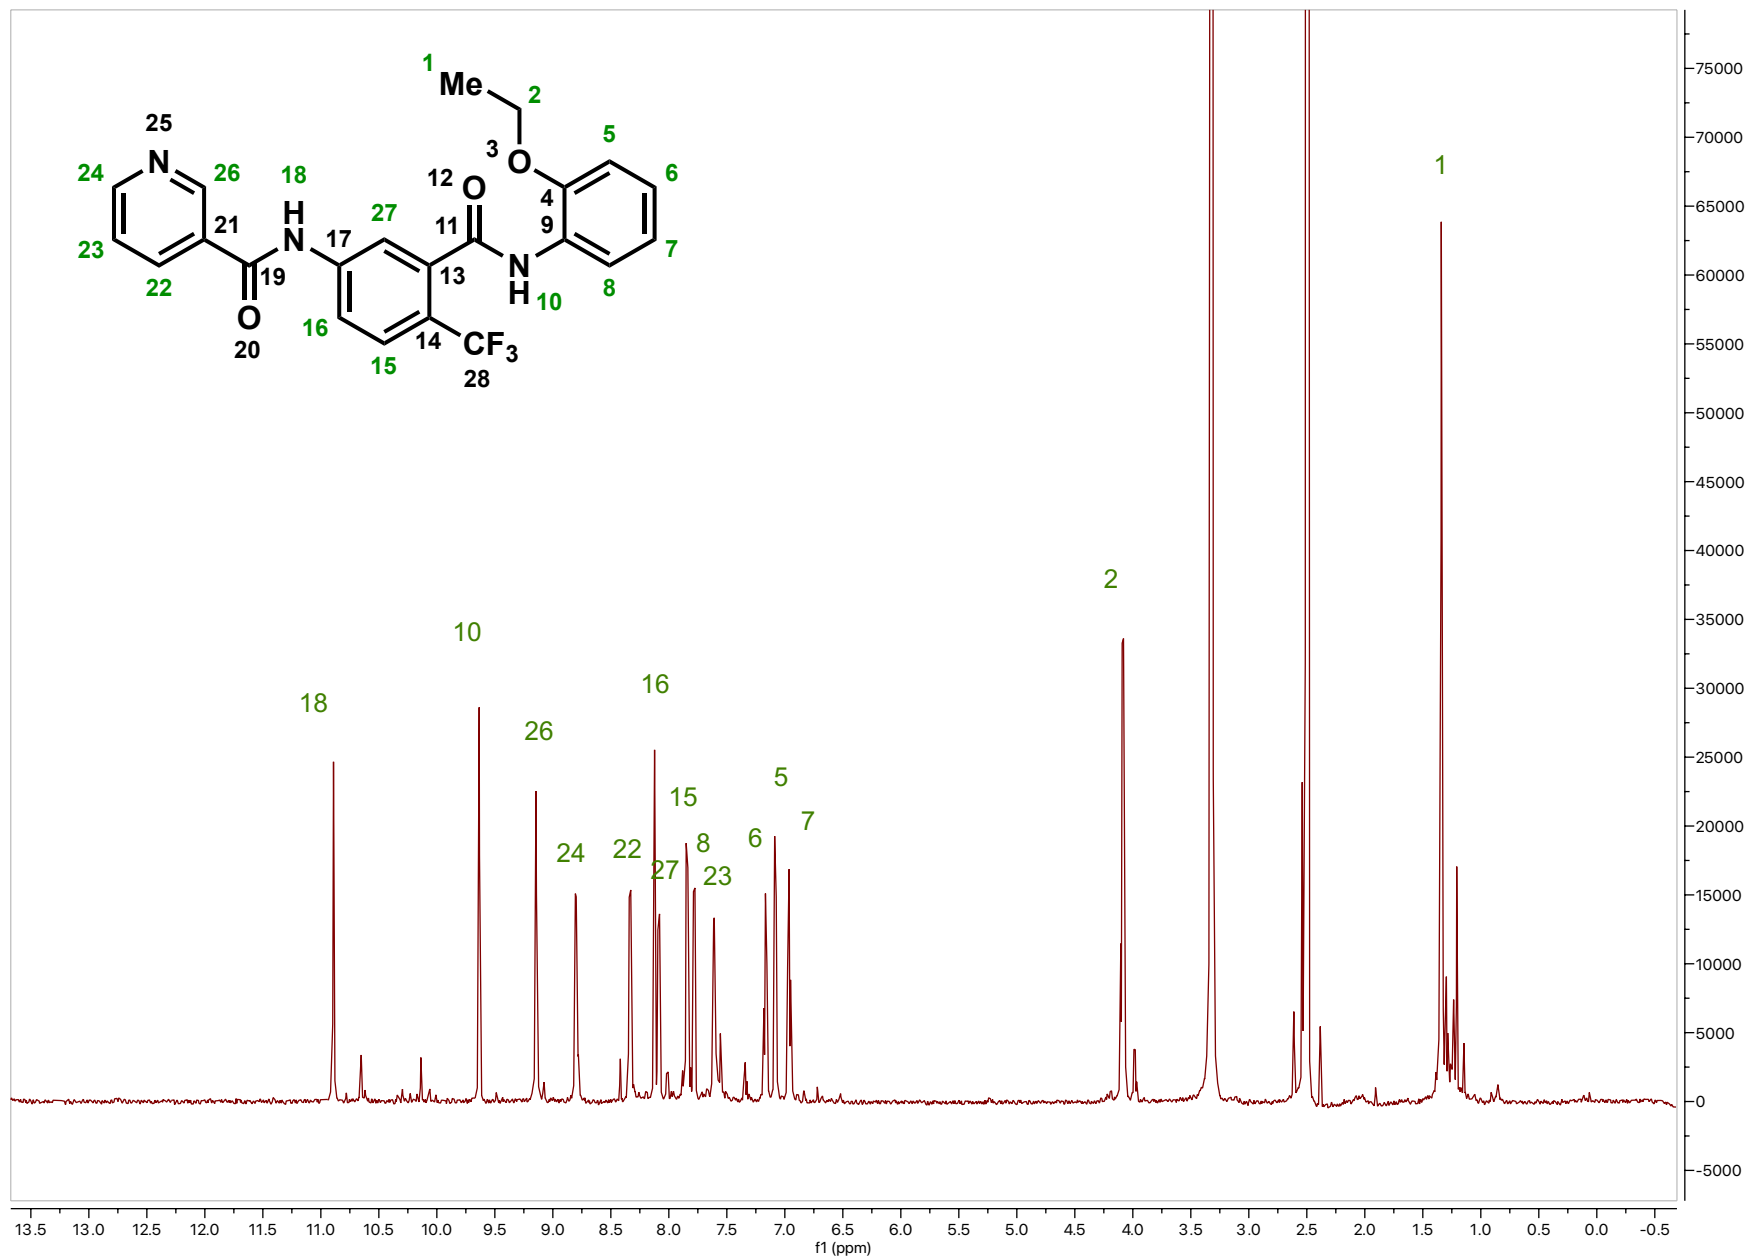

**Figure S19:** 600 MHz <sup>1</sup>H NMR spectrum for compound S11 in DMSO-d<sub>6</sub>. Green numbered atoms are atoms with a potential <sup>1</sup>H NMR signal. Green numbered peaks are mapped to their corresponding atom number.

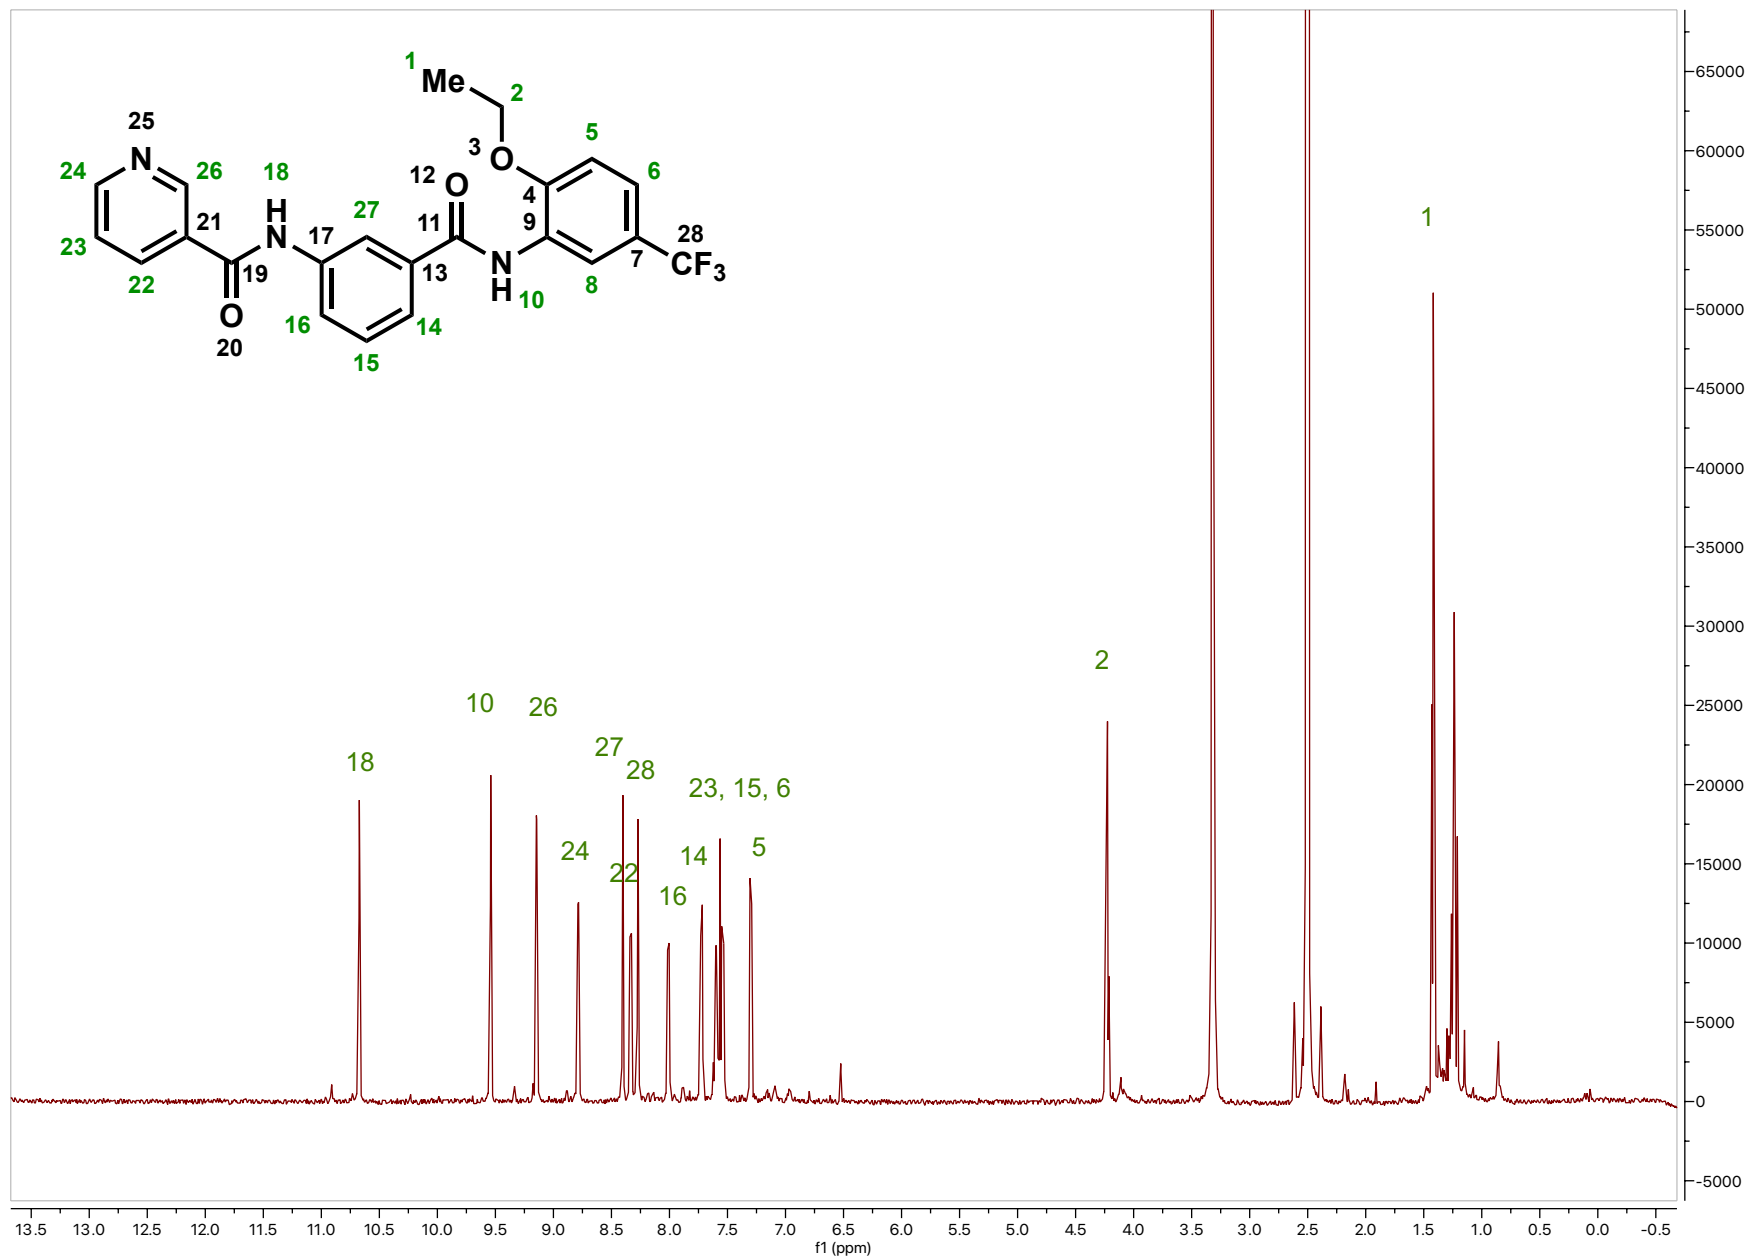

**Figure S20:** 600 MHz <sup>1</sup>H NMR spectrum for compound S12 in DMSO-d<sub>6</sub>. Green numbered atoms are atoms with a potential <sup>1</sup>H NMR signal. Green numbered peaks are mapped to their corresponding atom number.



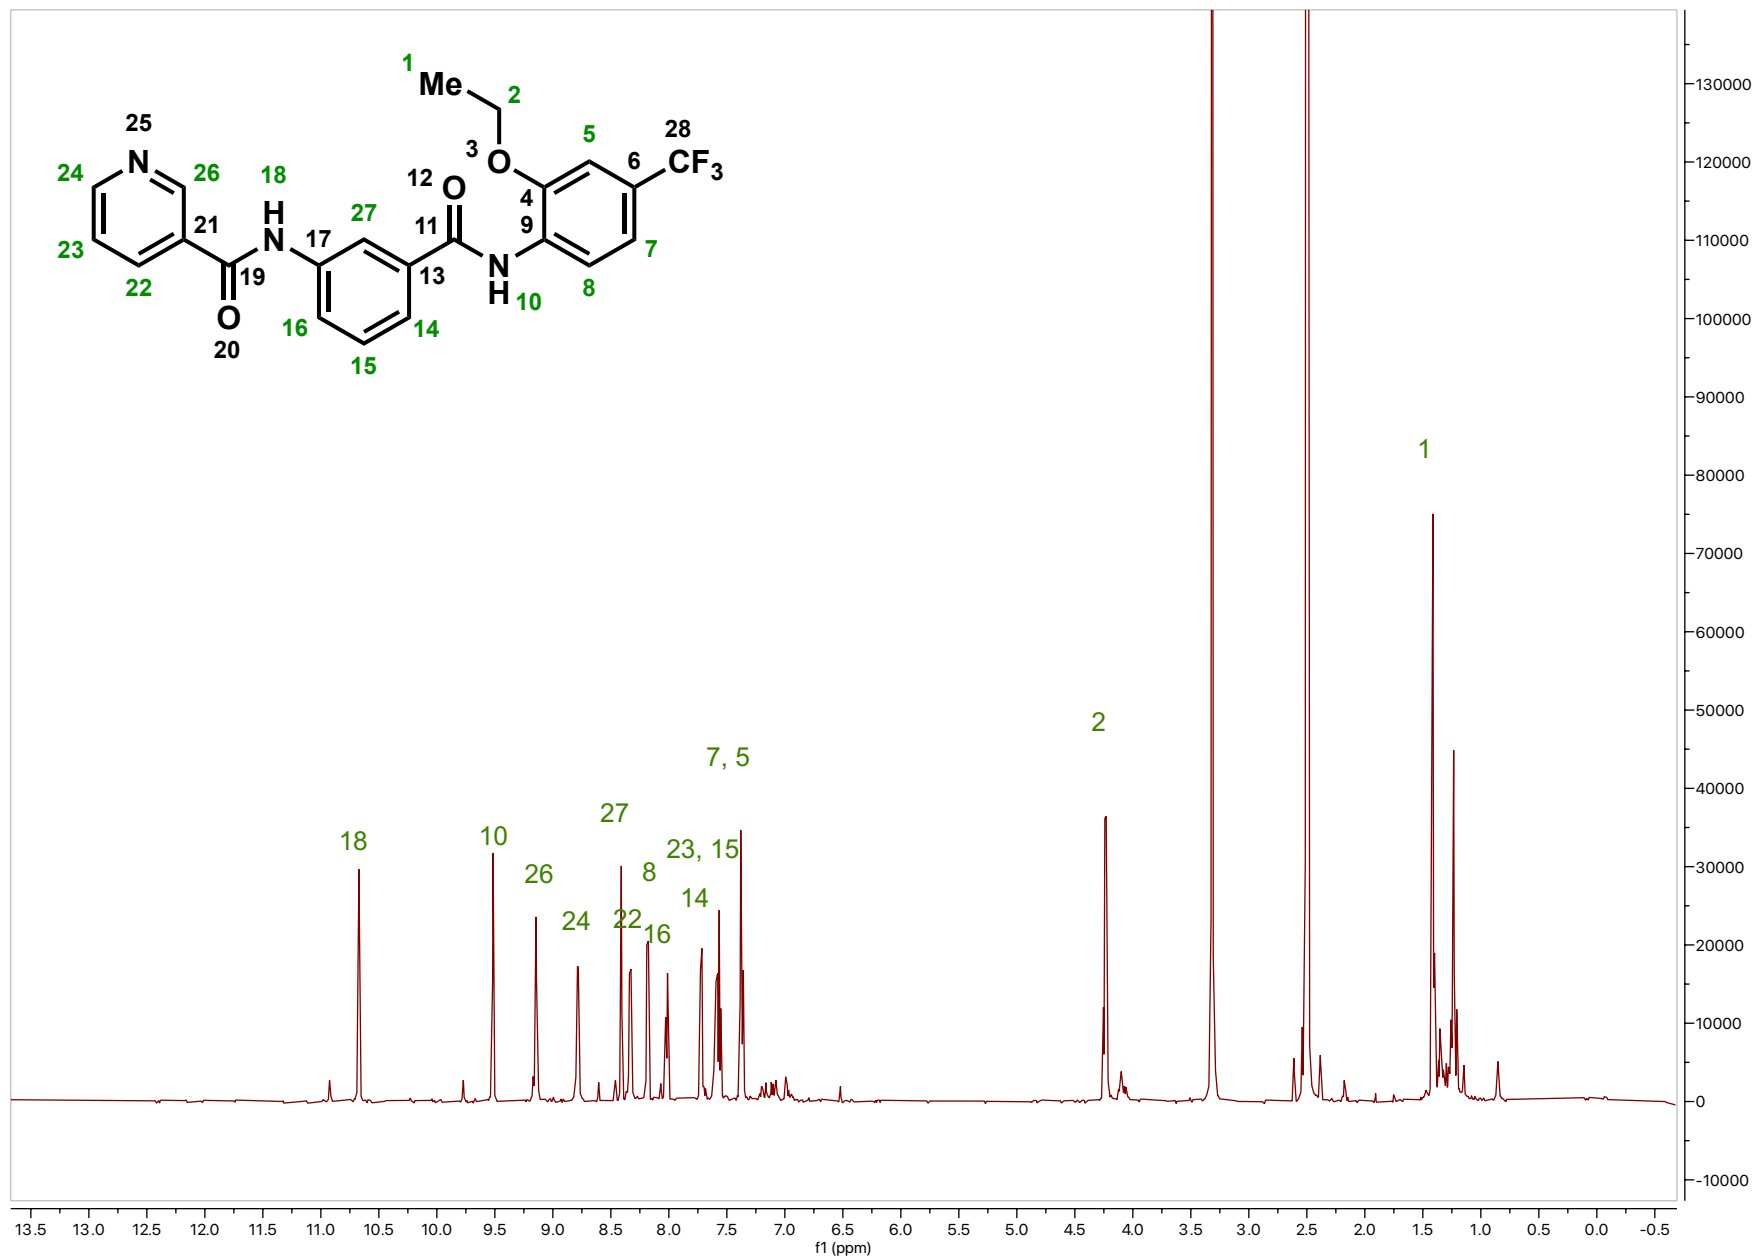

**Figure S21:** 600 MHz <sup>1</sup>H NMR spectrum for compound S13 in DMSO-d<sub>6</sub>. Green numbered atoms are atoms with a potential <sup>1</sup>H NMR signal. Green numbered peaks are mapped to their corresponding atom number.

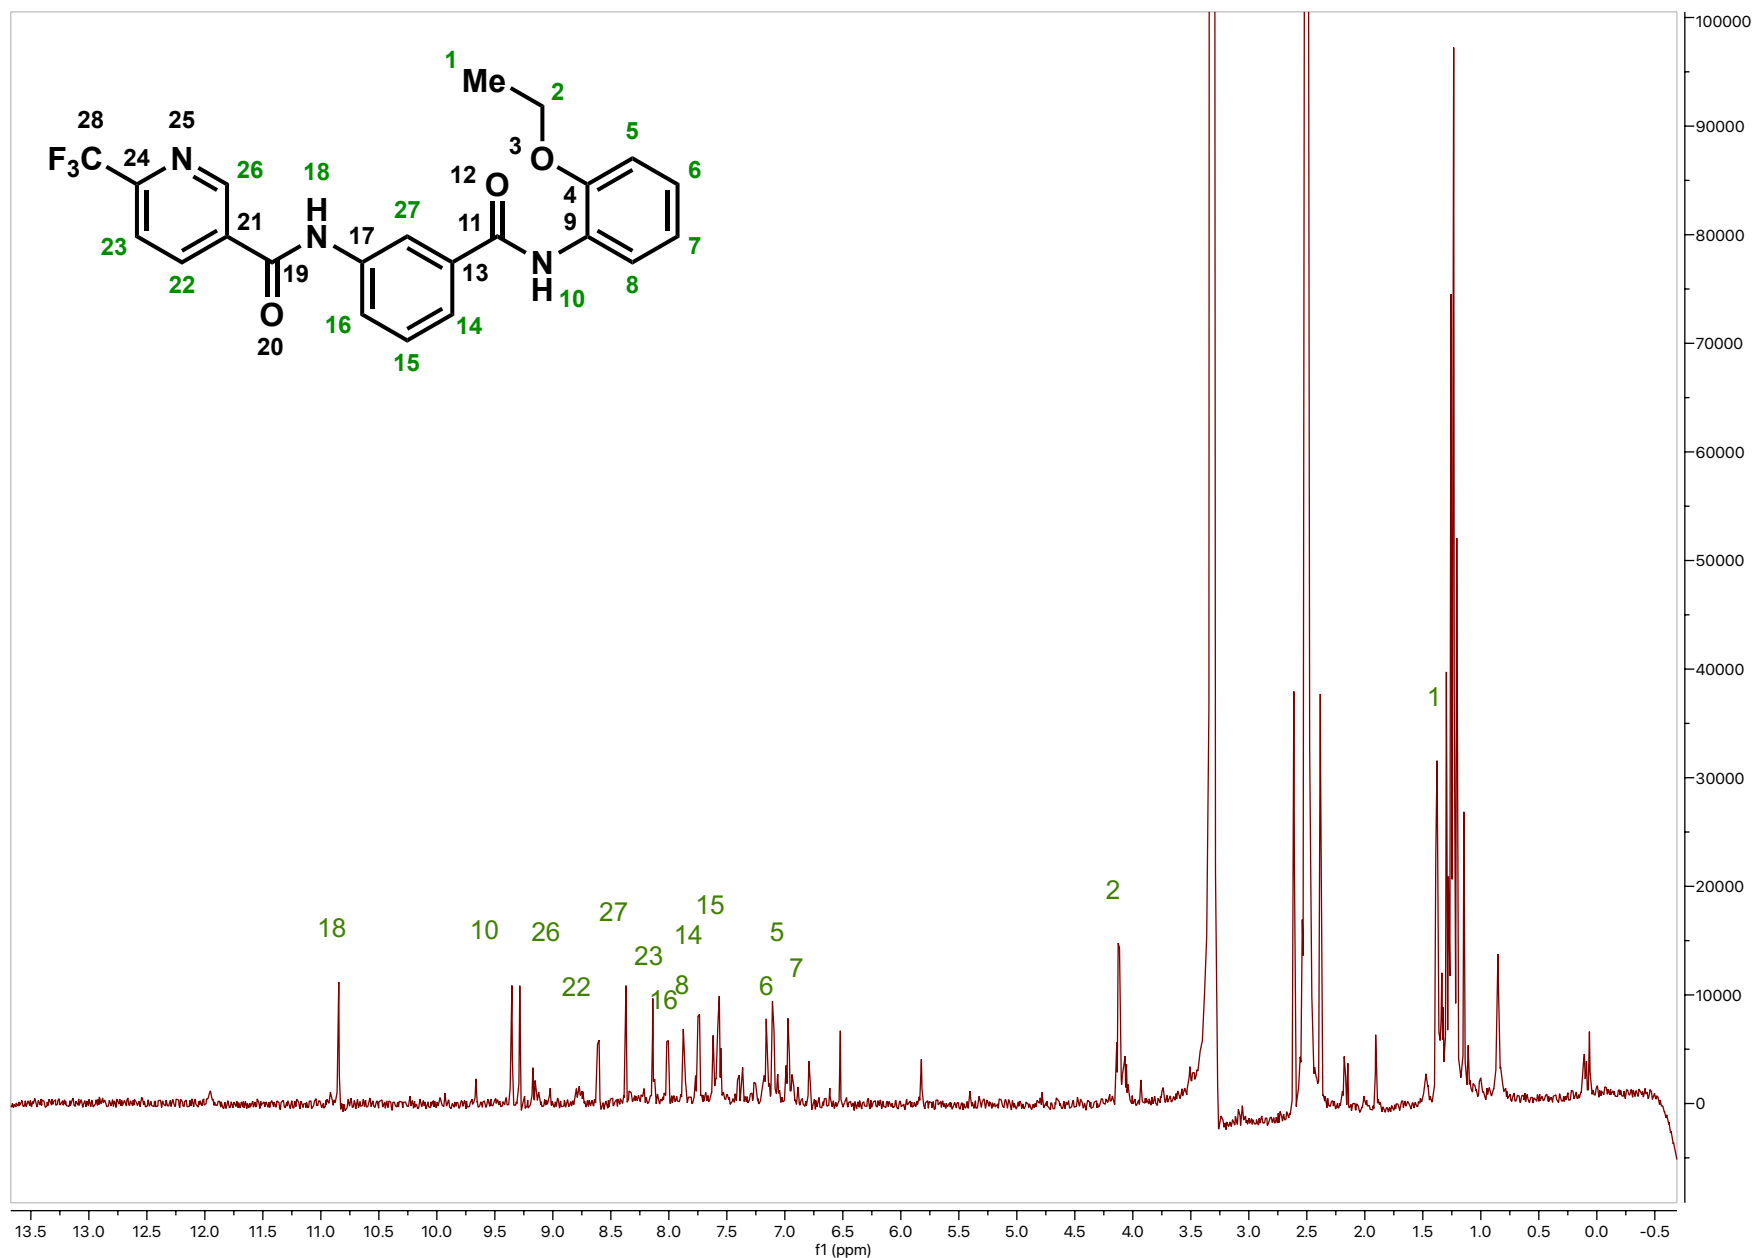

**Figure S22:** 600 MHz <sup>1</sup>H NMR spectrum for compound S14 in DMSO-d<sub>6</sub>. Green numbered atoms are atoms with a potential <sup>1</sup>H NMR signal. Green numbered peaks are mapped to their corresponding atom number.

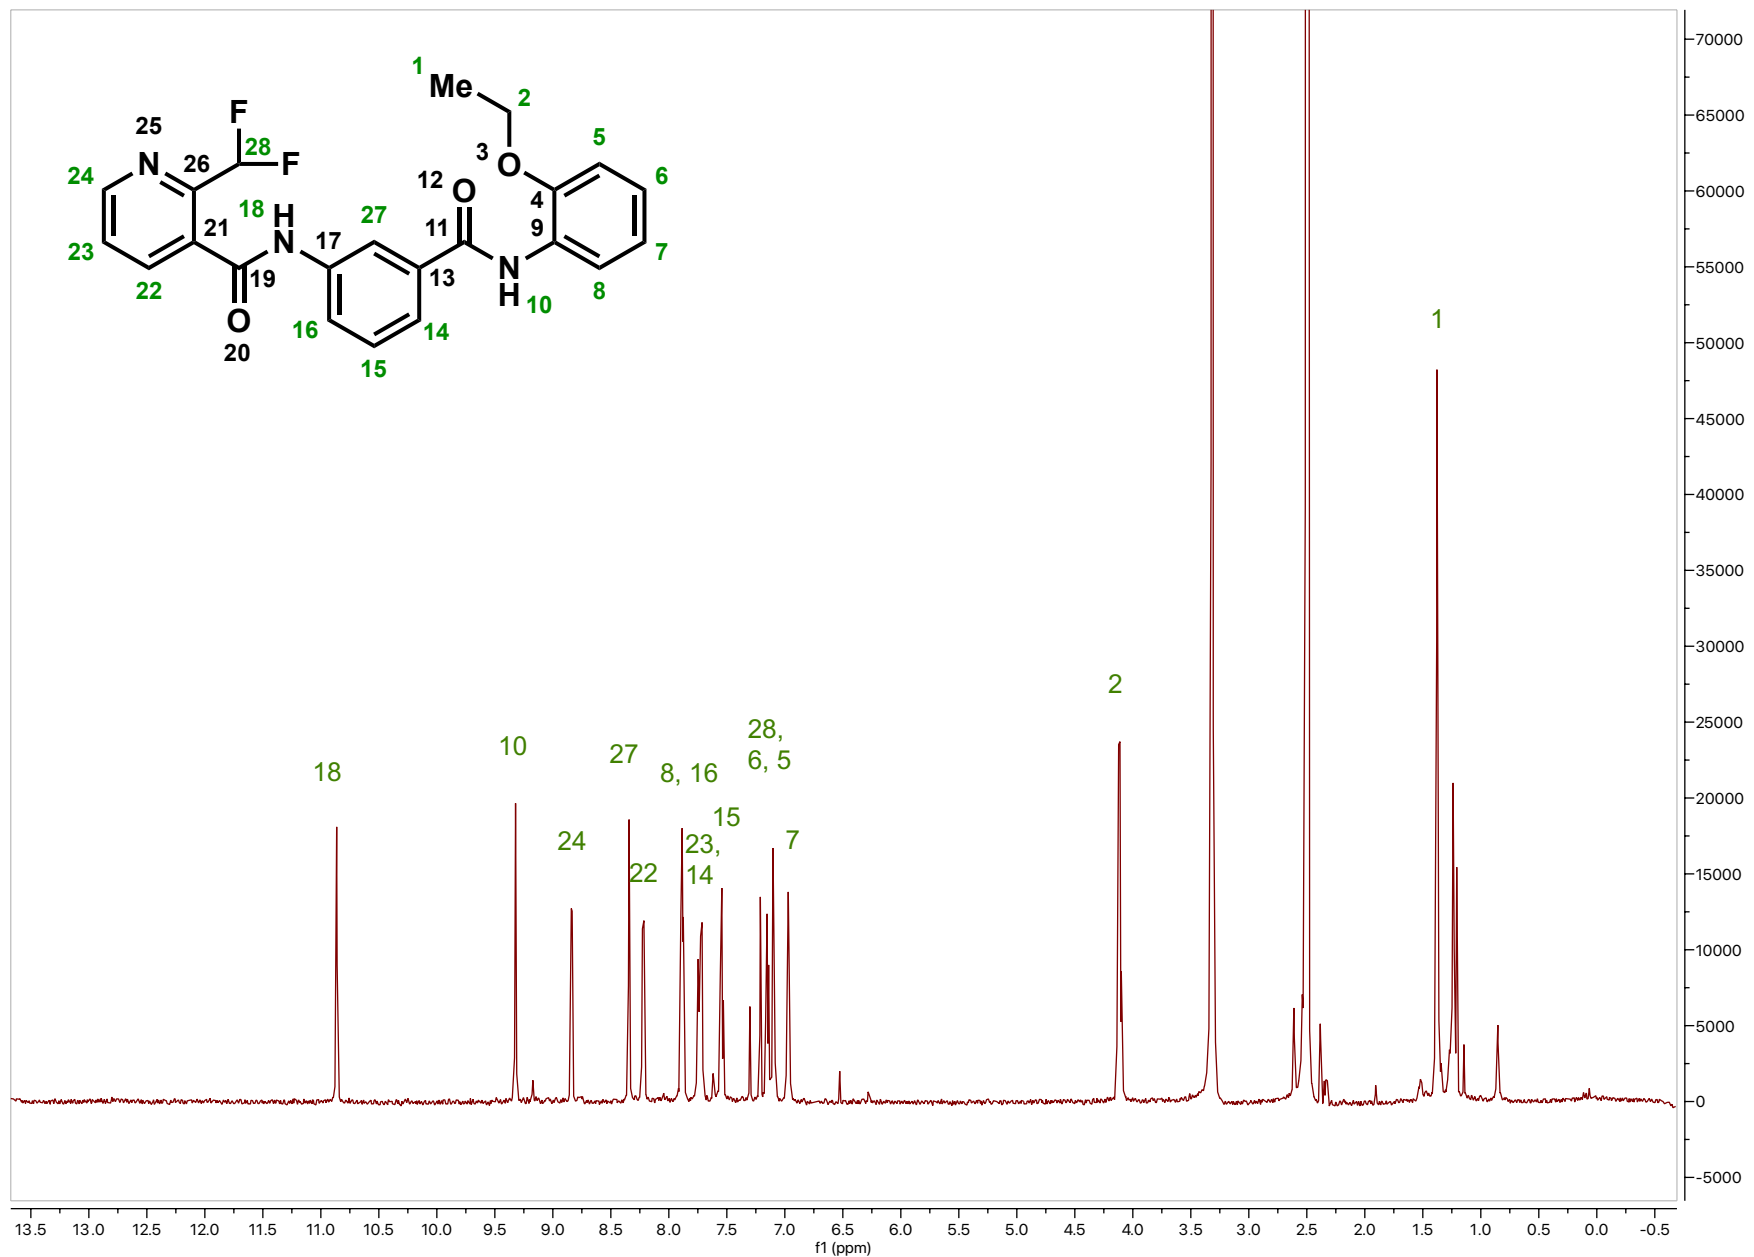

**Figure S23:** 600 MHz <sup>1</sup>H NMR spectrum for compound S15 in DMSO-d<sub>6</sub>. Green numbered atoms are atoms with a potential <sup>1</sup>H NMR signal. Green numbered peaks are mapped to their corresponding atom number.

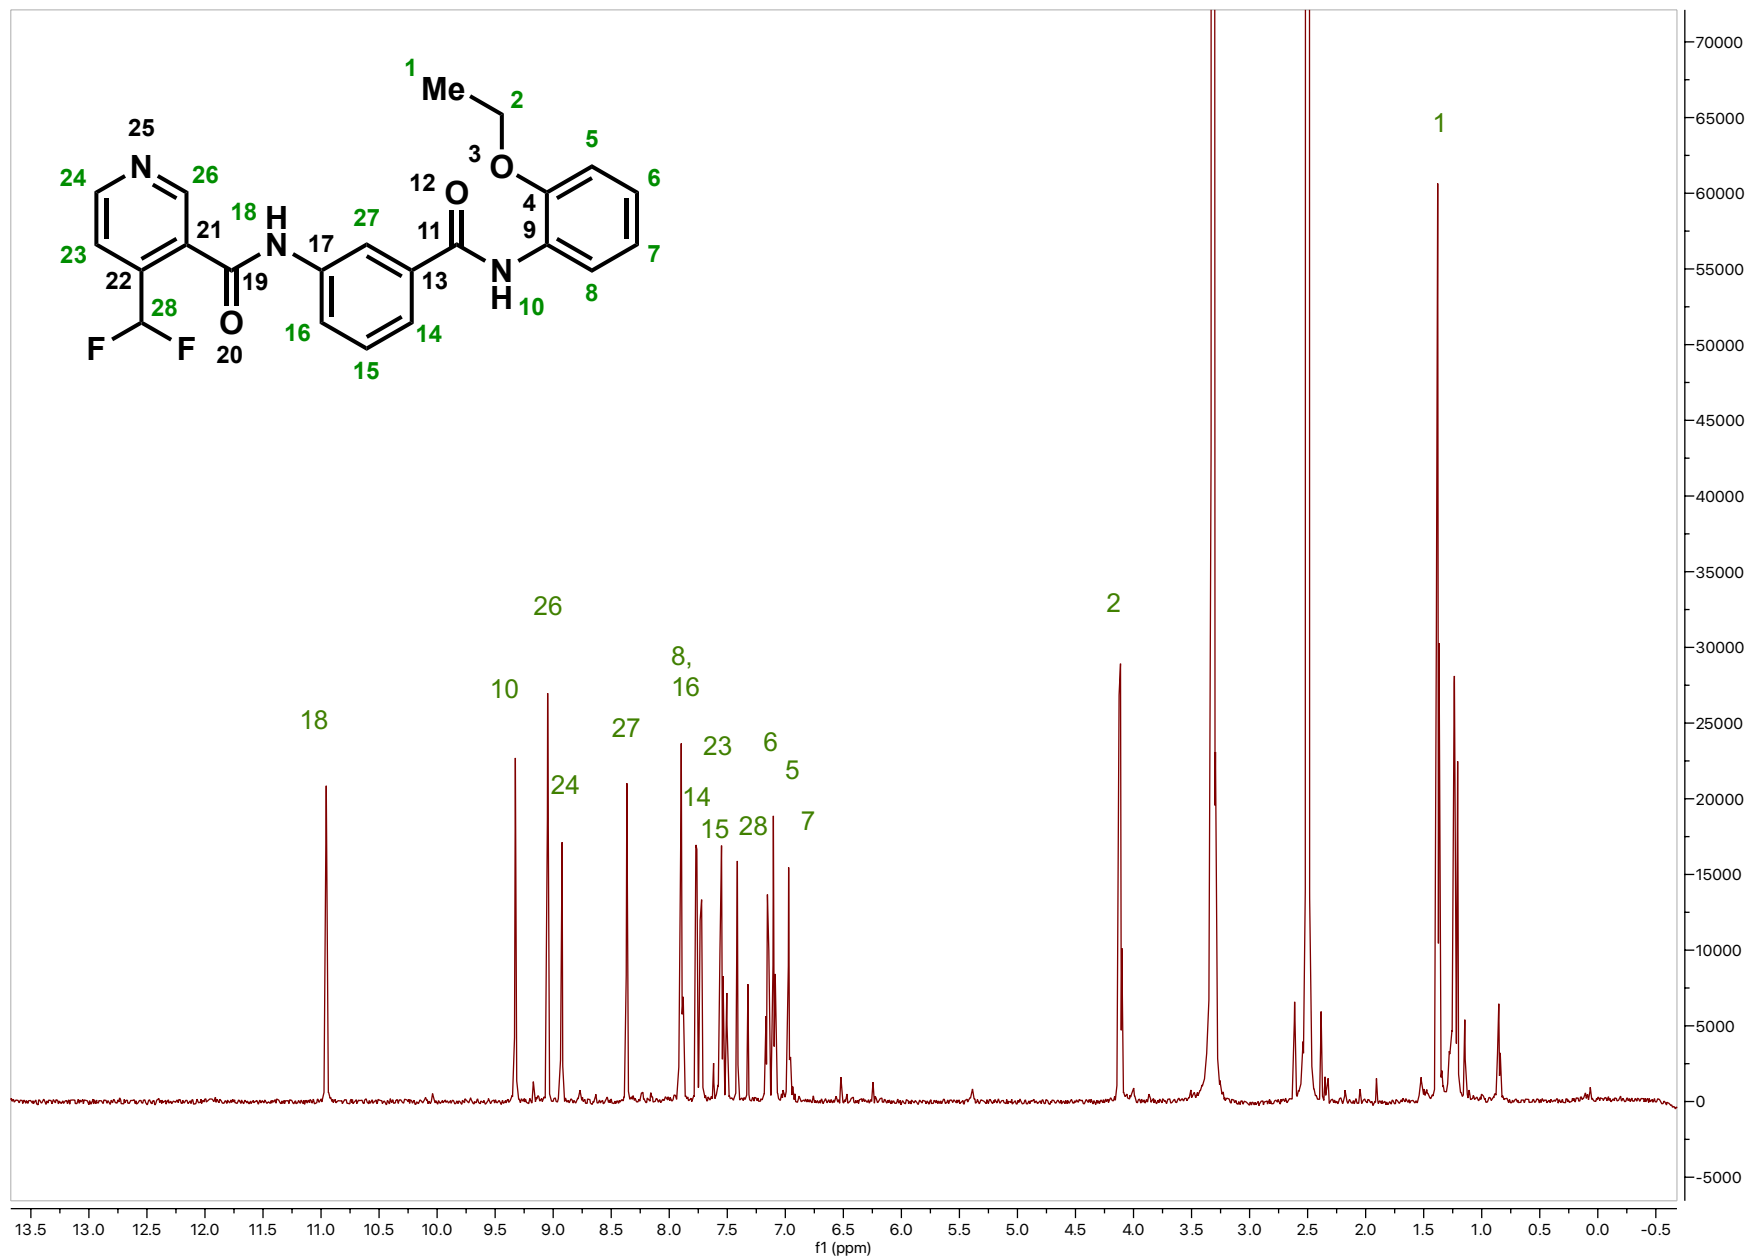

**Figure S24:** 600 MHz <sup>1</sup>H NMR spectrum for compound S16 in DMSO-d<sub>6</sub>. Green numbered atoms are atoms with a potential <sup>1</sup>H NMR signal. Green numbered peaks are mapped to their corresponding atom number.

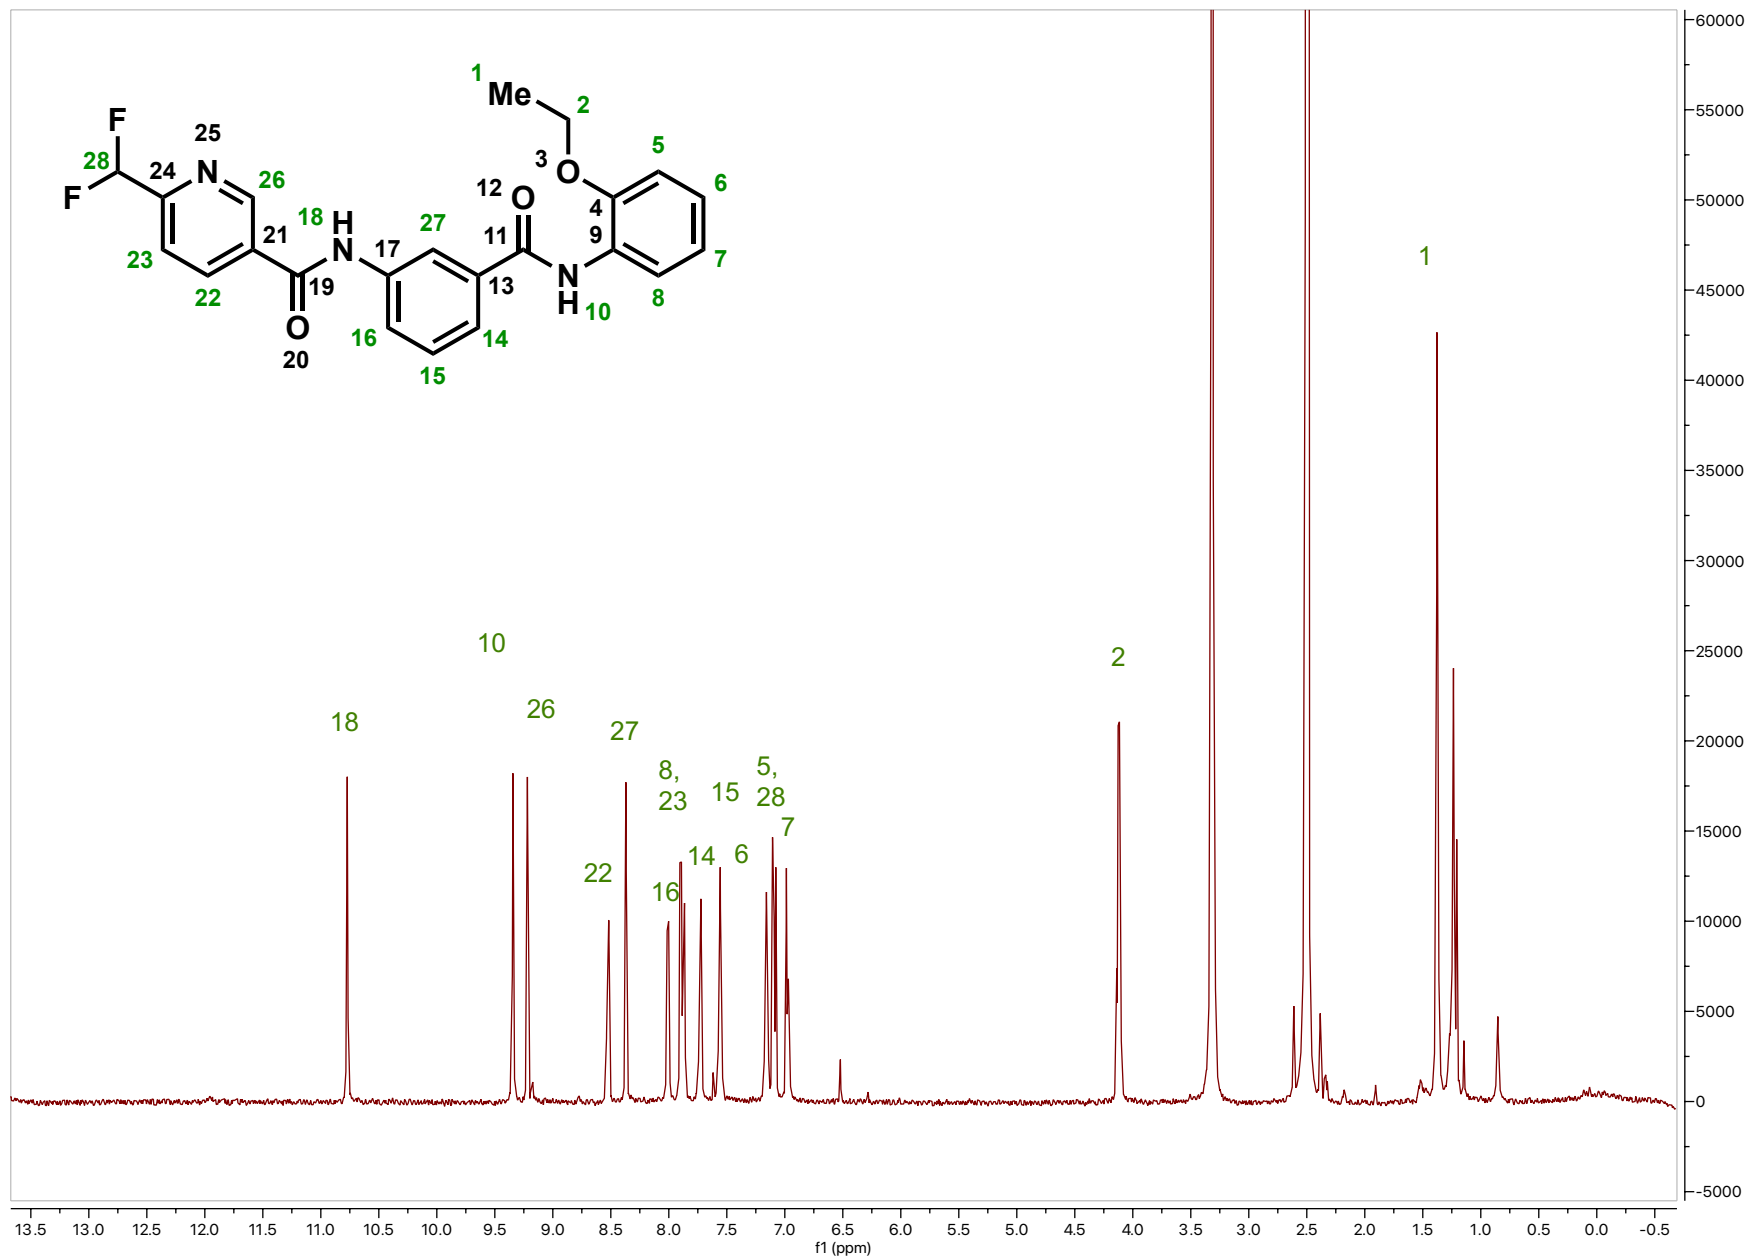

**Figure S25:** 600 MHz <sup>1</sup>H NMR spectrum for compound S17 in DMSO-d<sub>6</sub>. Green numbered atoms are atoms with a potential <sup>1</sup>H NMR signal. Green numbered peaks are mapped to their corresponding atom number.

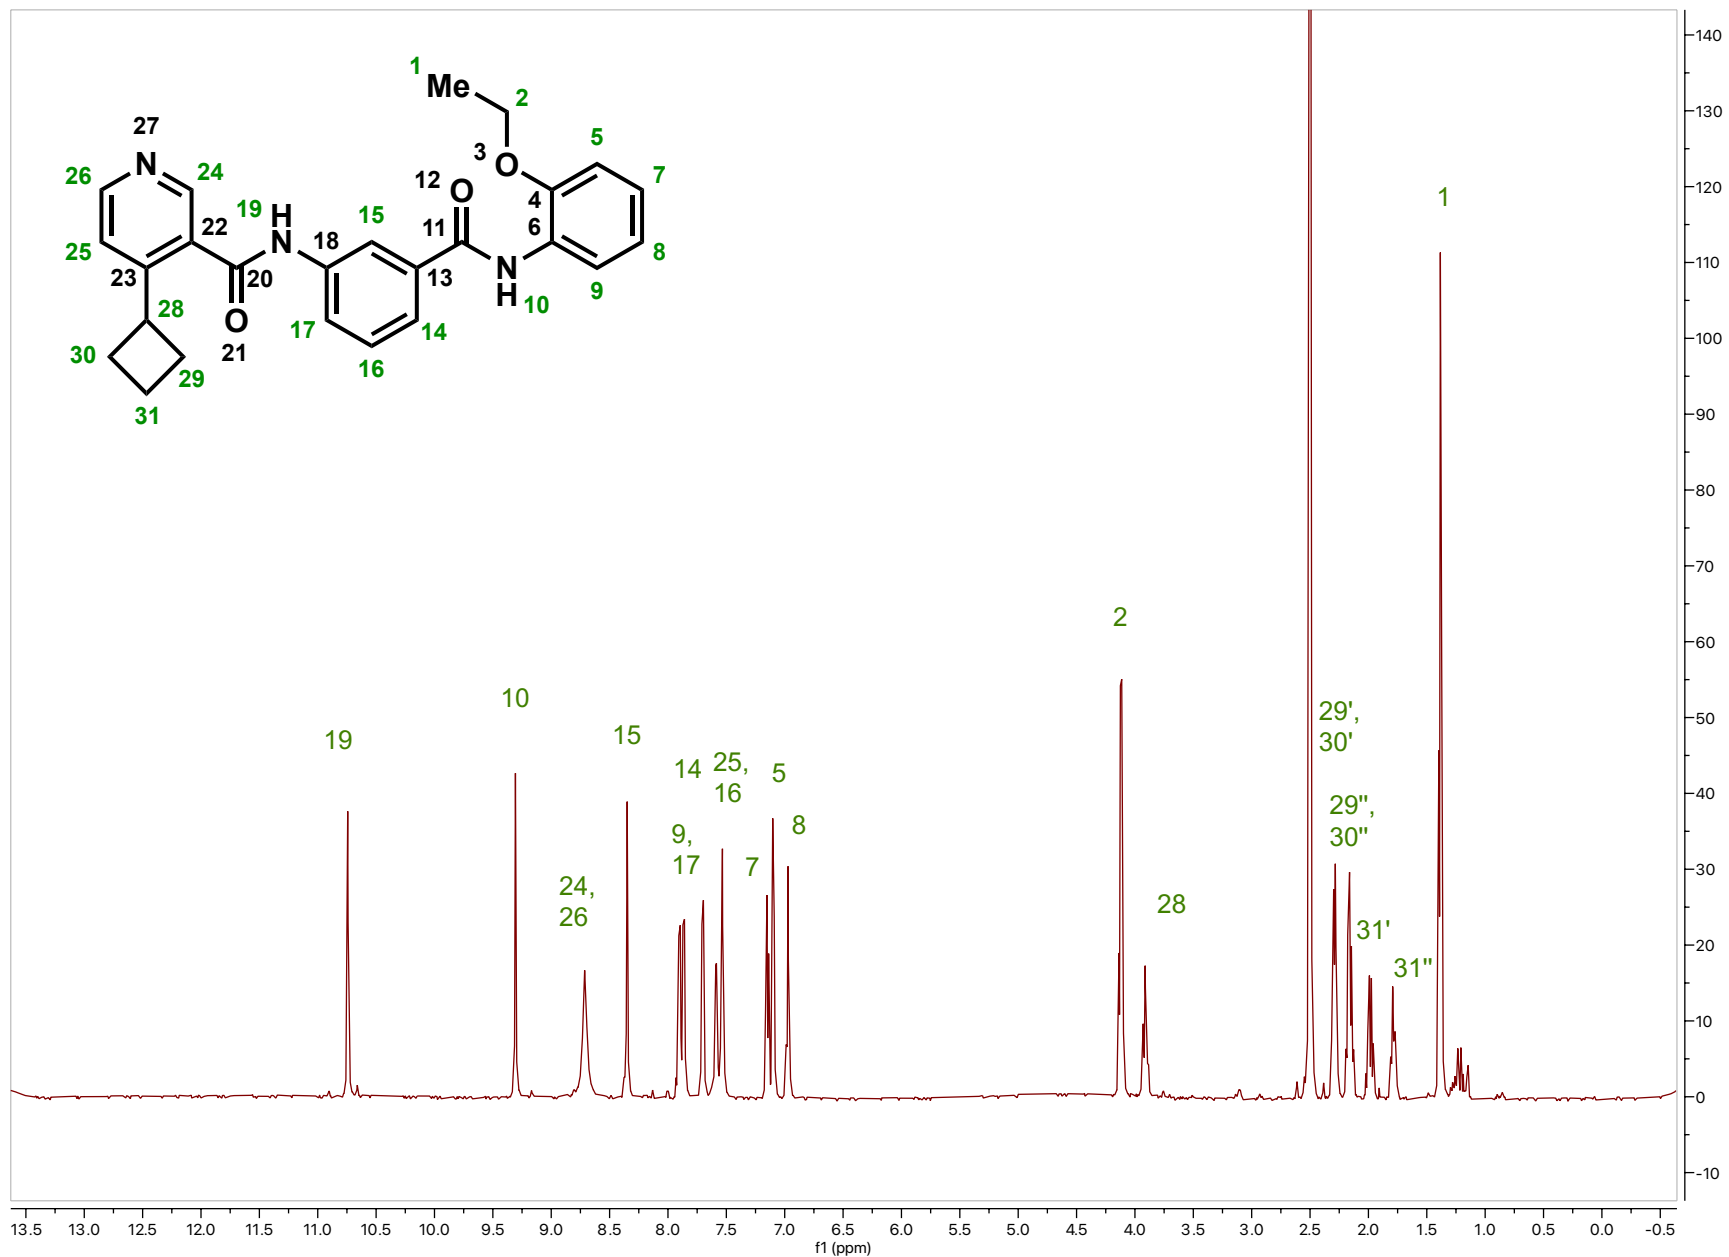

**Figure S26:** 600 MHz <sup>1</sup>H NMR spectrum for compound S18 in DMSO-d<sub>6</sub>. Green numbered atoms are atoms with a potential <sup>1</sup>H NMR signal. Green numbered peaks are mapped to their corresponding atom number.

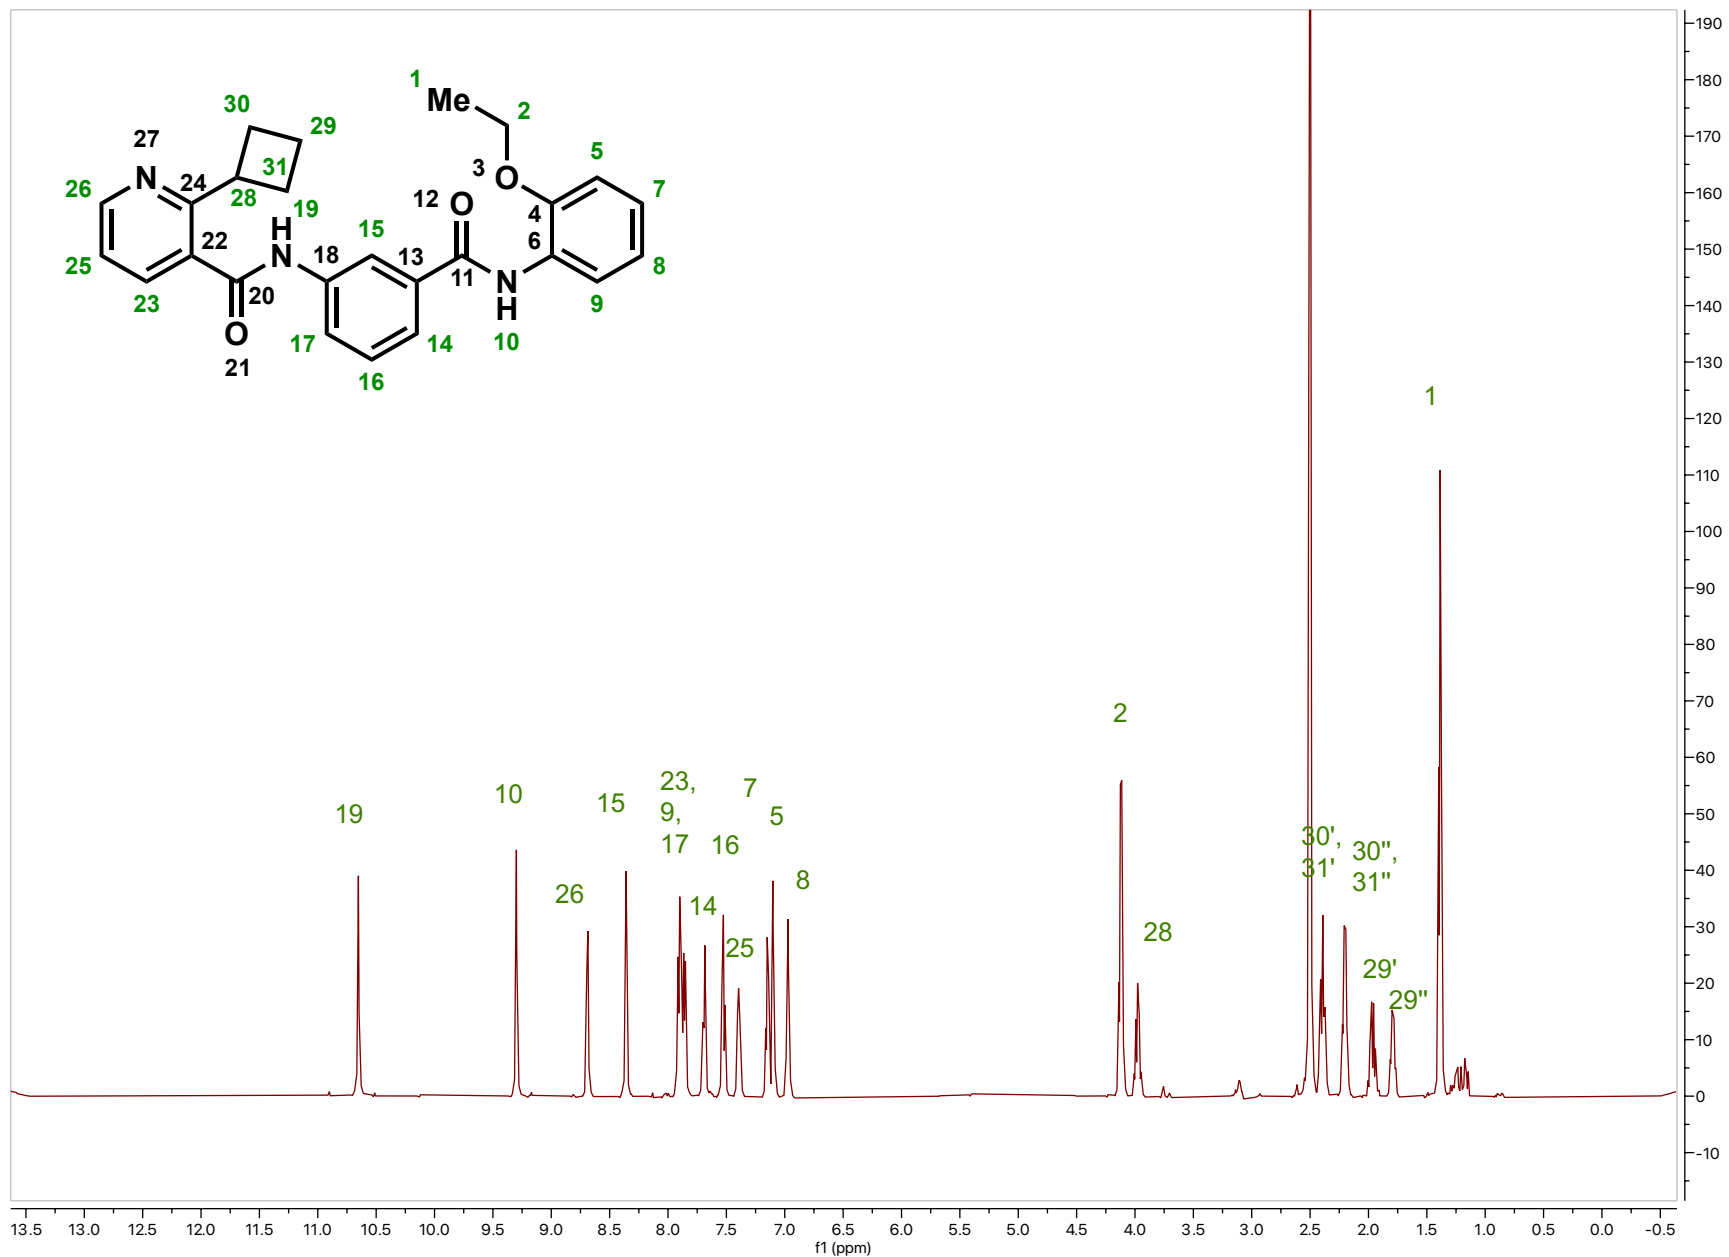

**Figure S27:** 600 MHz <sup>1</sup>H NMR spectrum for compound S19 in DMSO-d<sub>6</sub>. Green numbered atoms are atoms with a potential <sup>1</sup>H NMR signal. Green numbered peaks are mapped to their corresponding atom number.

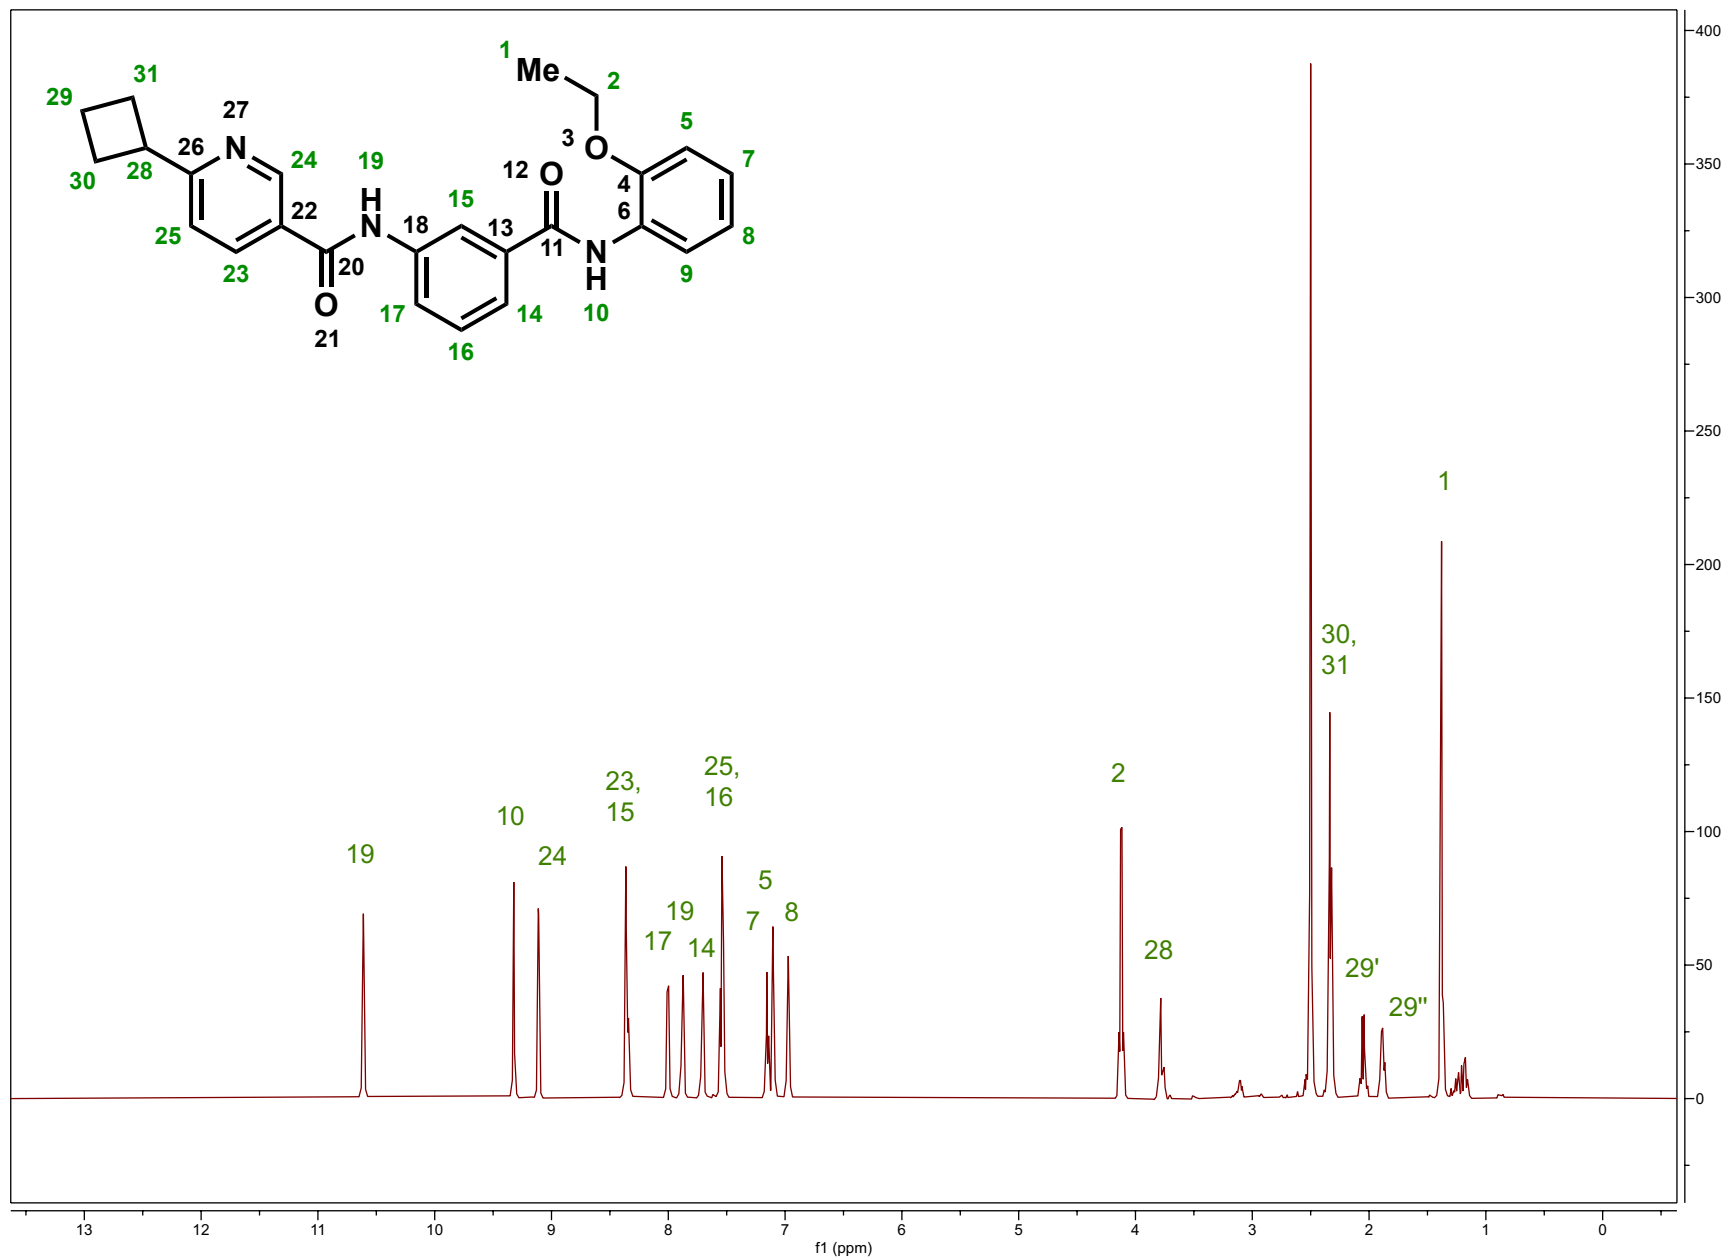

**Figure S28:** 600 MHz <sup>1</sup>H NMR spectrum for compound **S20** in DMSO-d<sub>6</sub>. Green numbered atoms are atoms with a potential <sup>1</sup>H NMR signal. Green numbered peaks are mapped to their corresponding atom number.



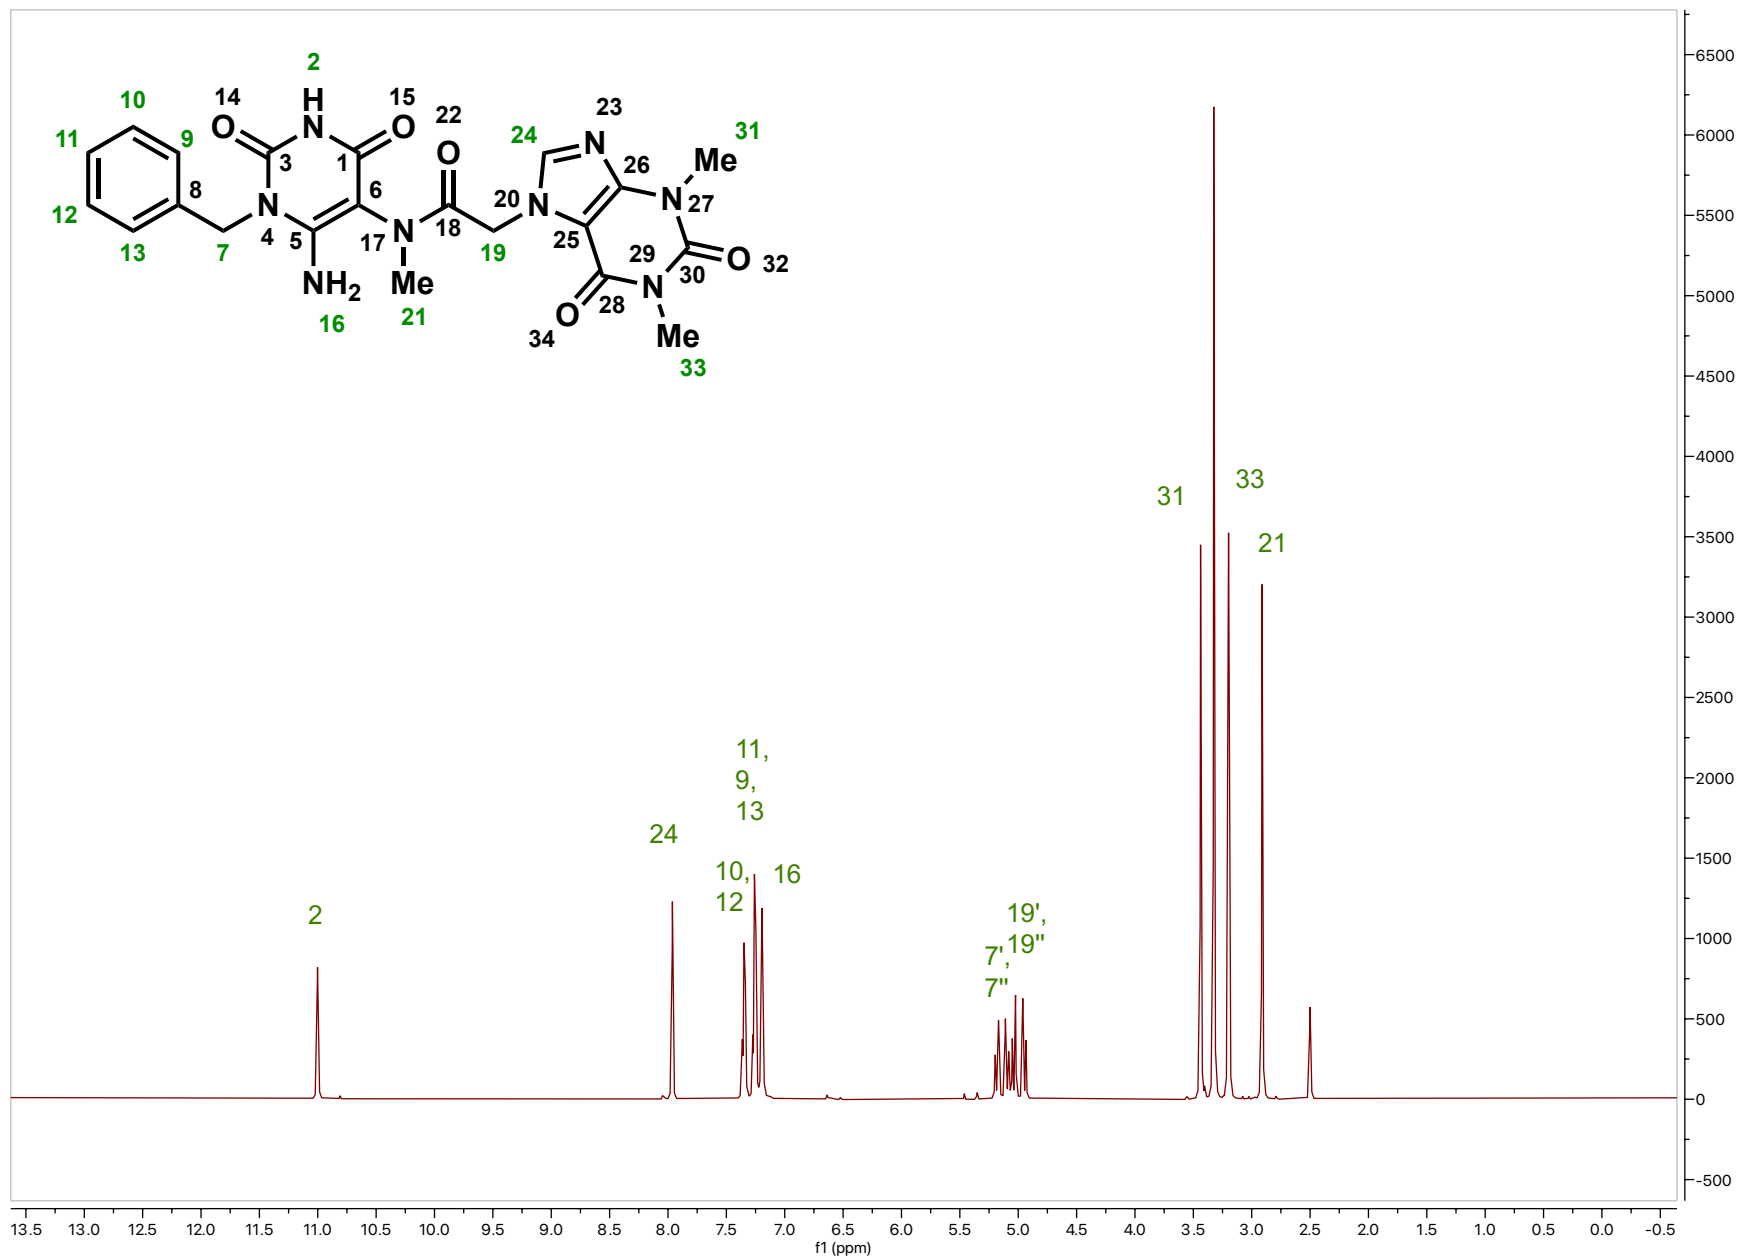

**Figure S29:** 600 MHz <sup>1</sup>H NMR spectrum for compound **8** in DMSO-d<sub>6</sub>. Green numbered atoms are atoms with a potential <sup>1</sup>H NMR signal. Green numbered peaks are mapped to their corresponding atom number.

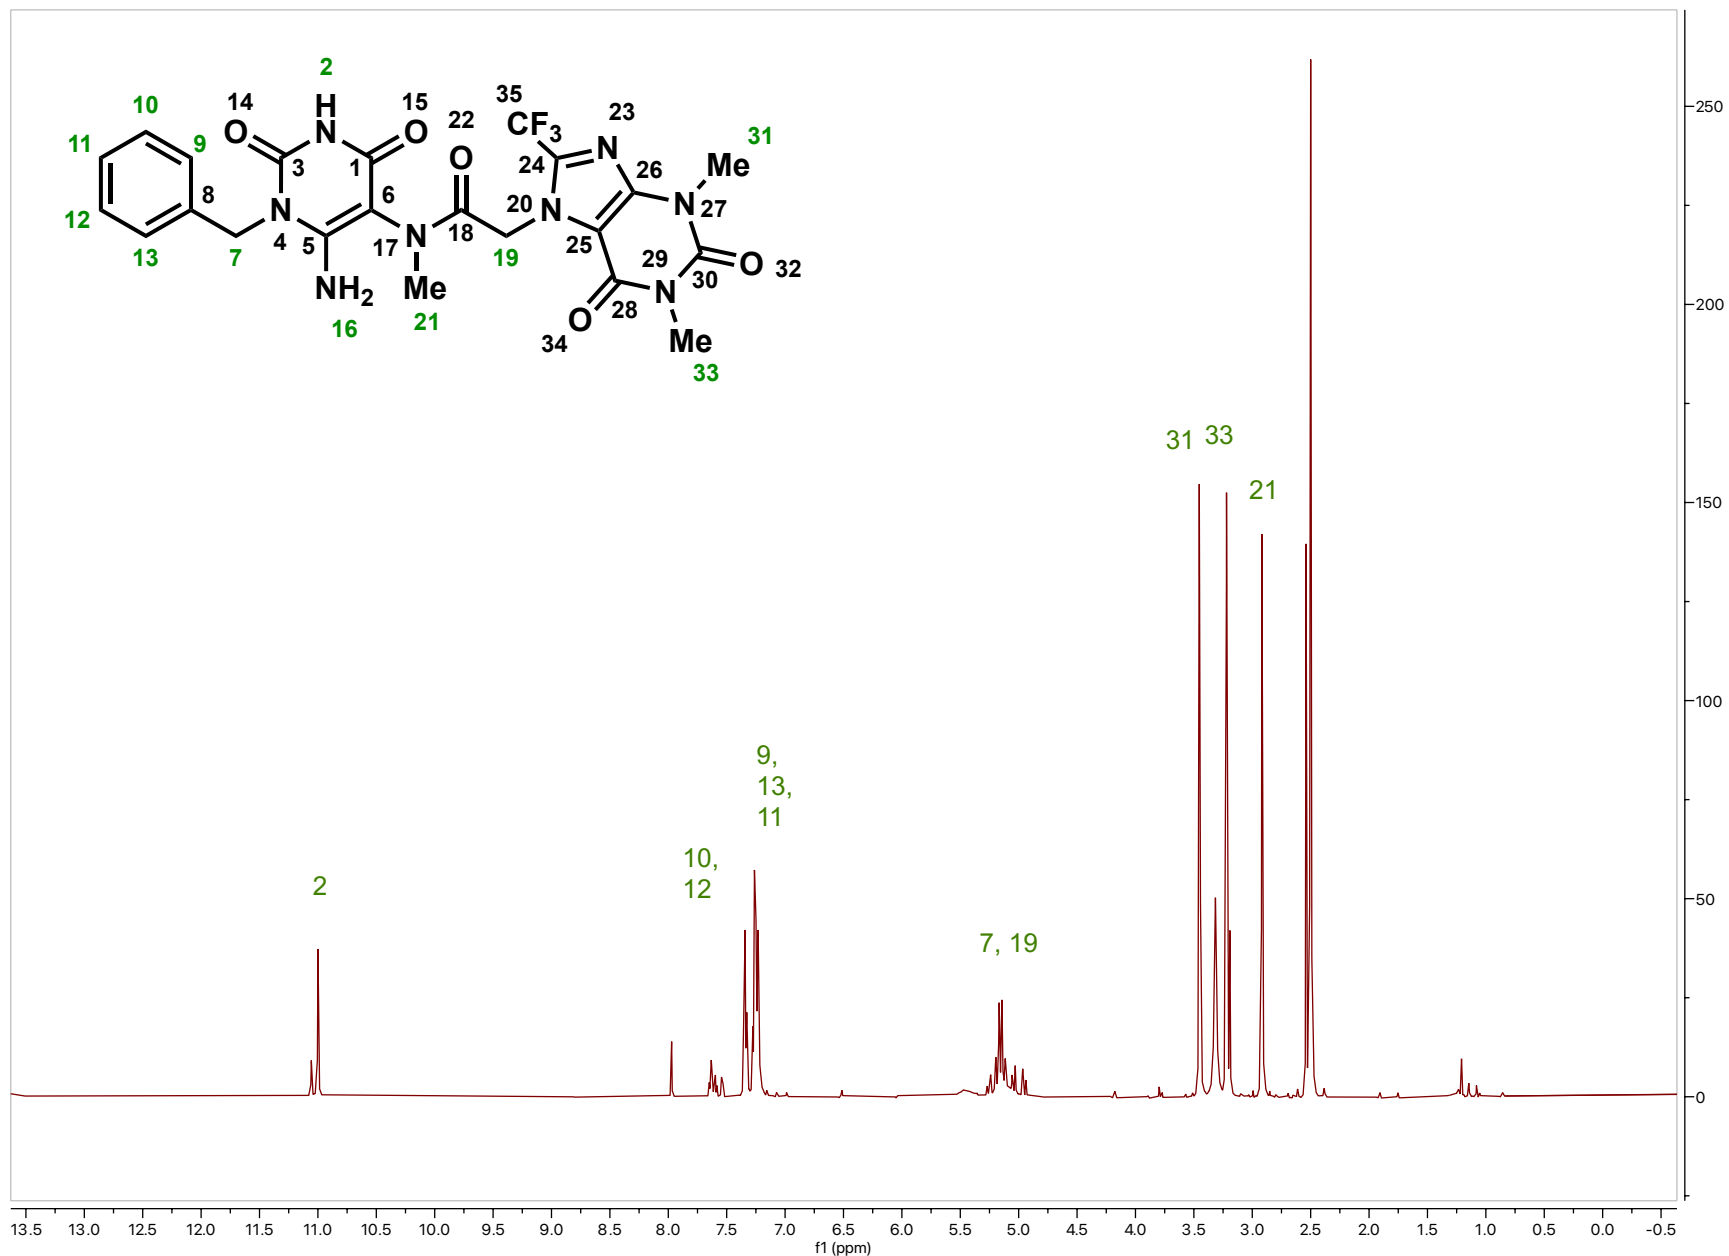

**Figure S30:** 600 MHz <sup>1</sup>H NMR spectrum for compound S21 in DMSO-d<sub>6</sub>. Green numbered atoms are atoms with a potential <sup>1</sup>H NMR signal. Green numbered peaks are mapped to their corresponding atom number.

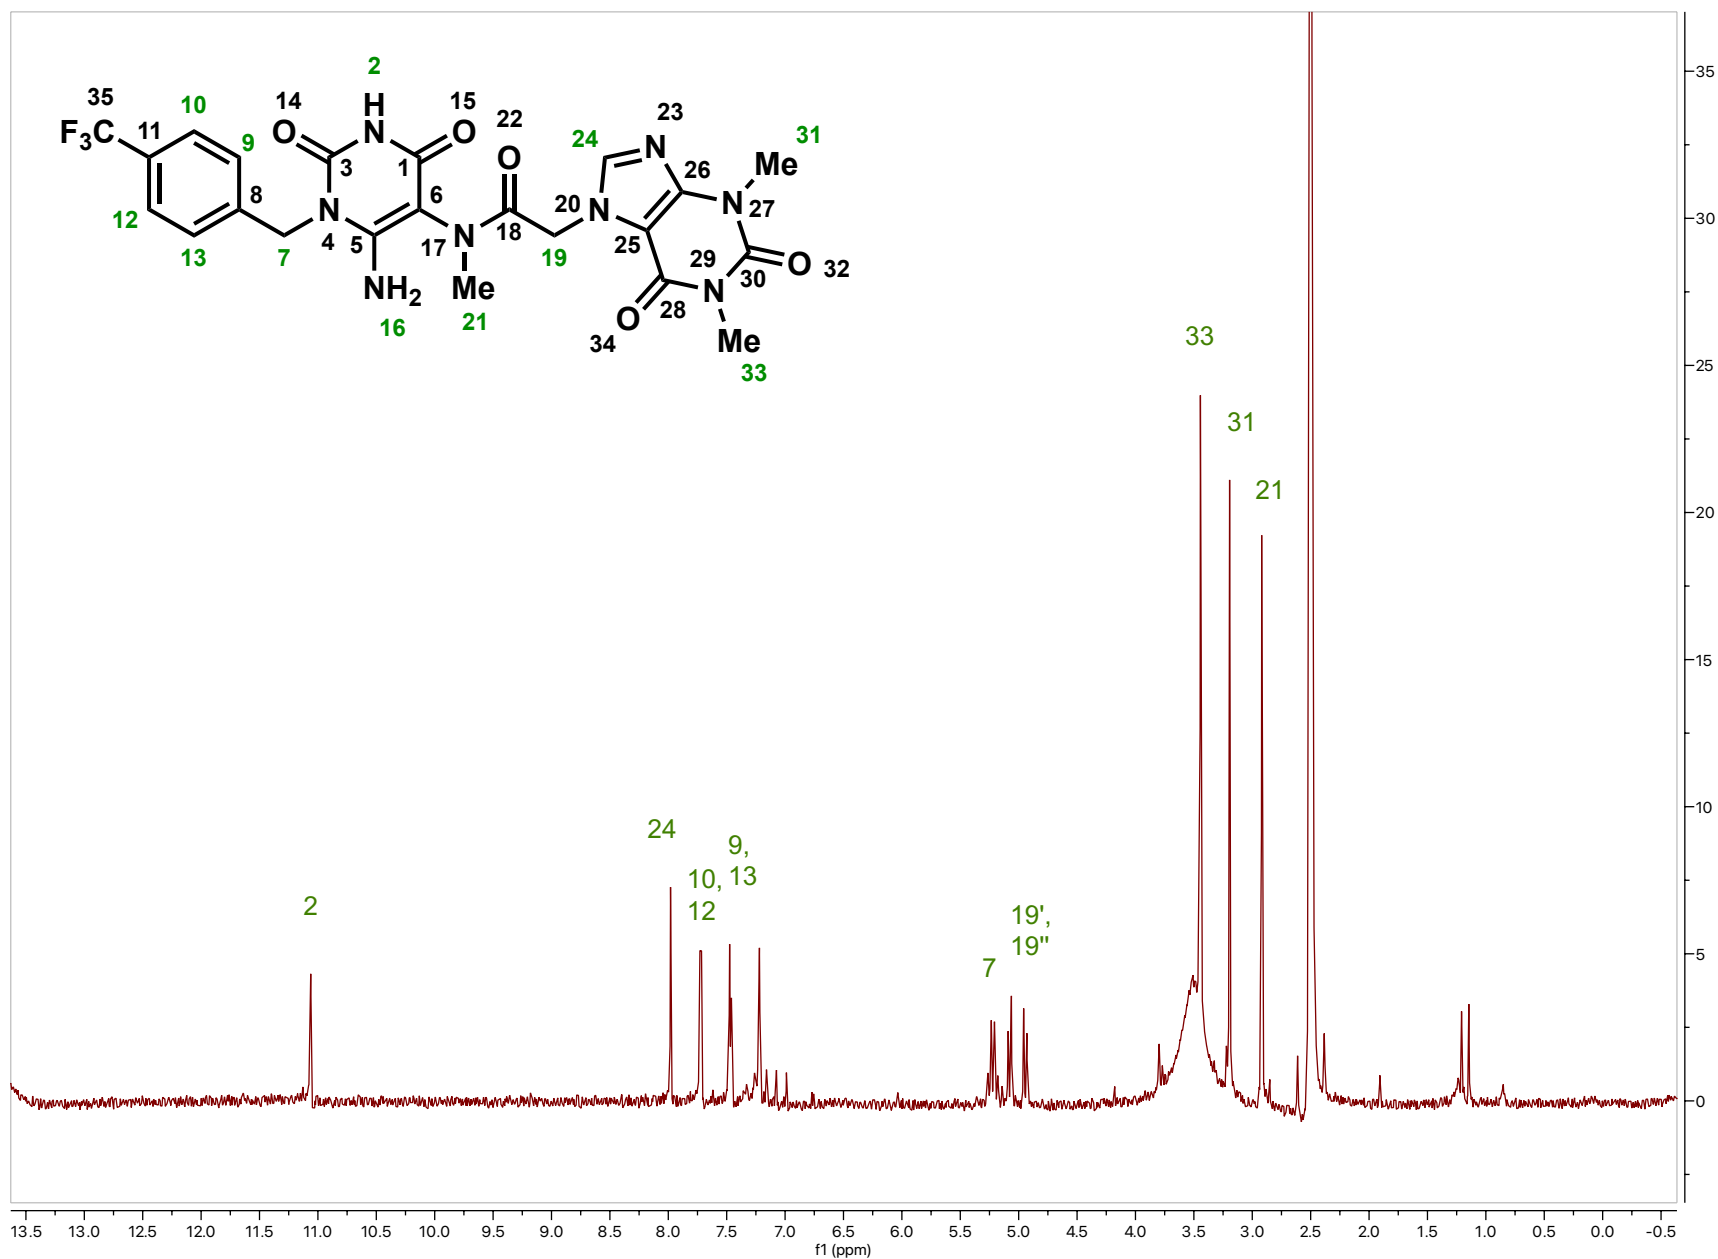

**Figure S31:** 600 MHz <sup>1</sup>H NMR spectrum for compound S22 in DMSO-d<sub>6</sub>. Green numbered atoms are atoms with a potential <sup>1</sup>H NMR signal. Green numbered peaks are mapped to their corresponding atom number.

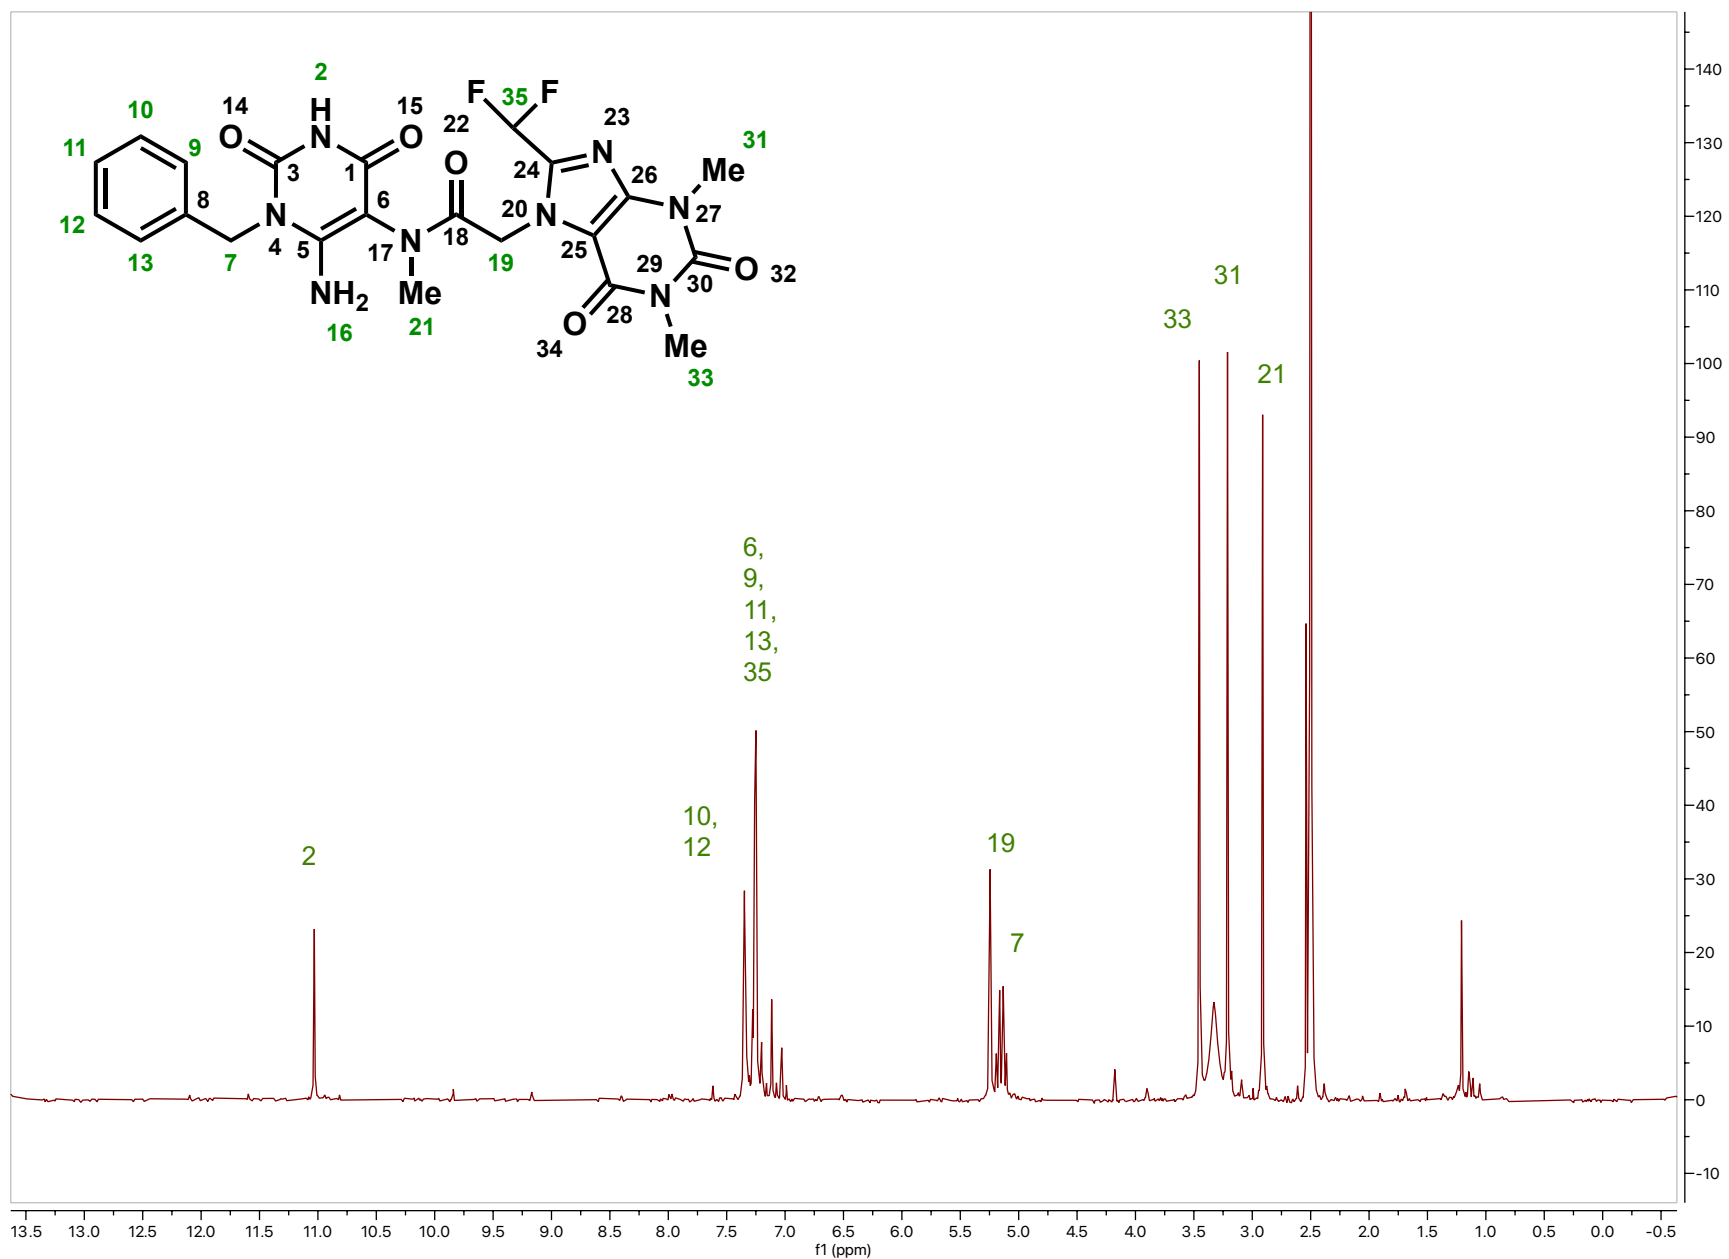

**Figure S32:** 600 MHz <sup>1</sup>H NMR spectrum for compound S23 in DMSO-d<sub>6</sub>. Green numbered atoms are atoms with a potential <sup>1</sup>H NMR signal. Green numbered peaks are mapped to their corresponding atom number.

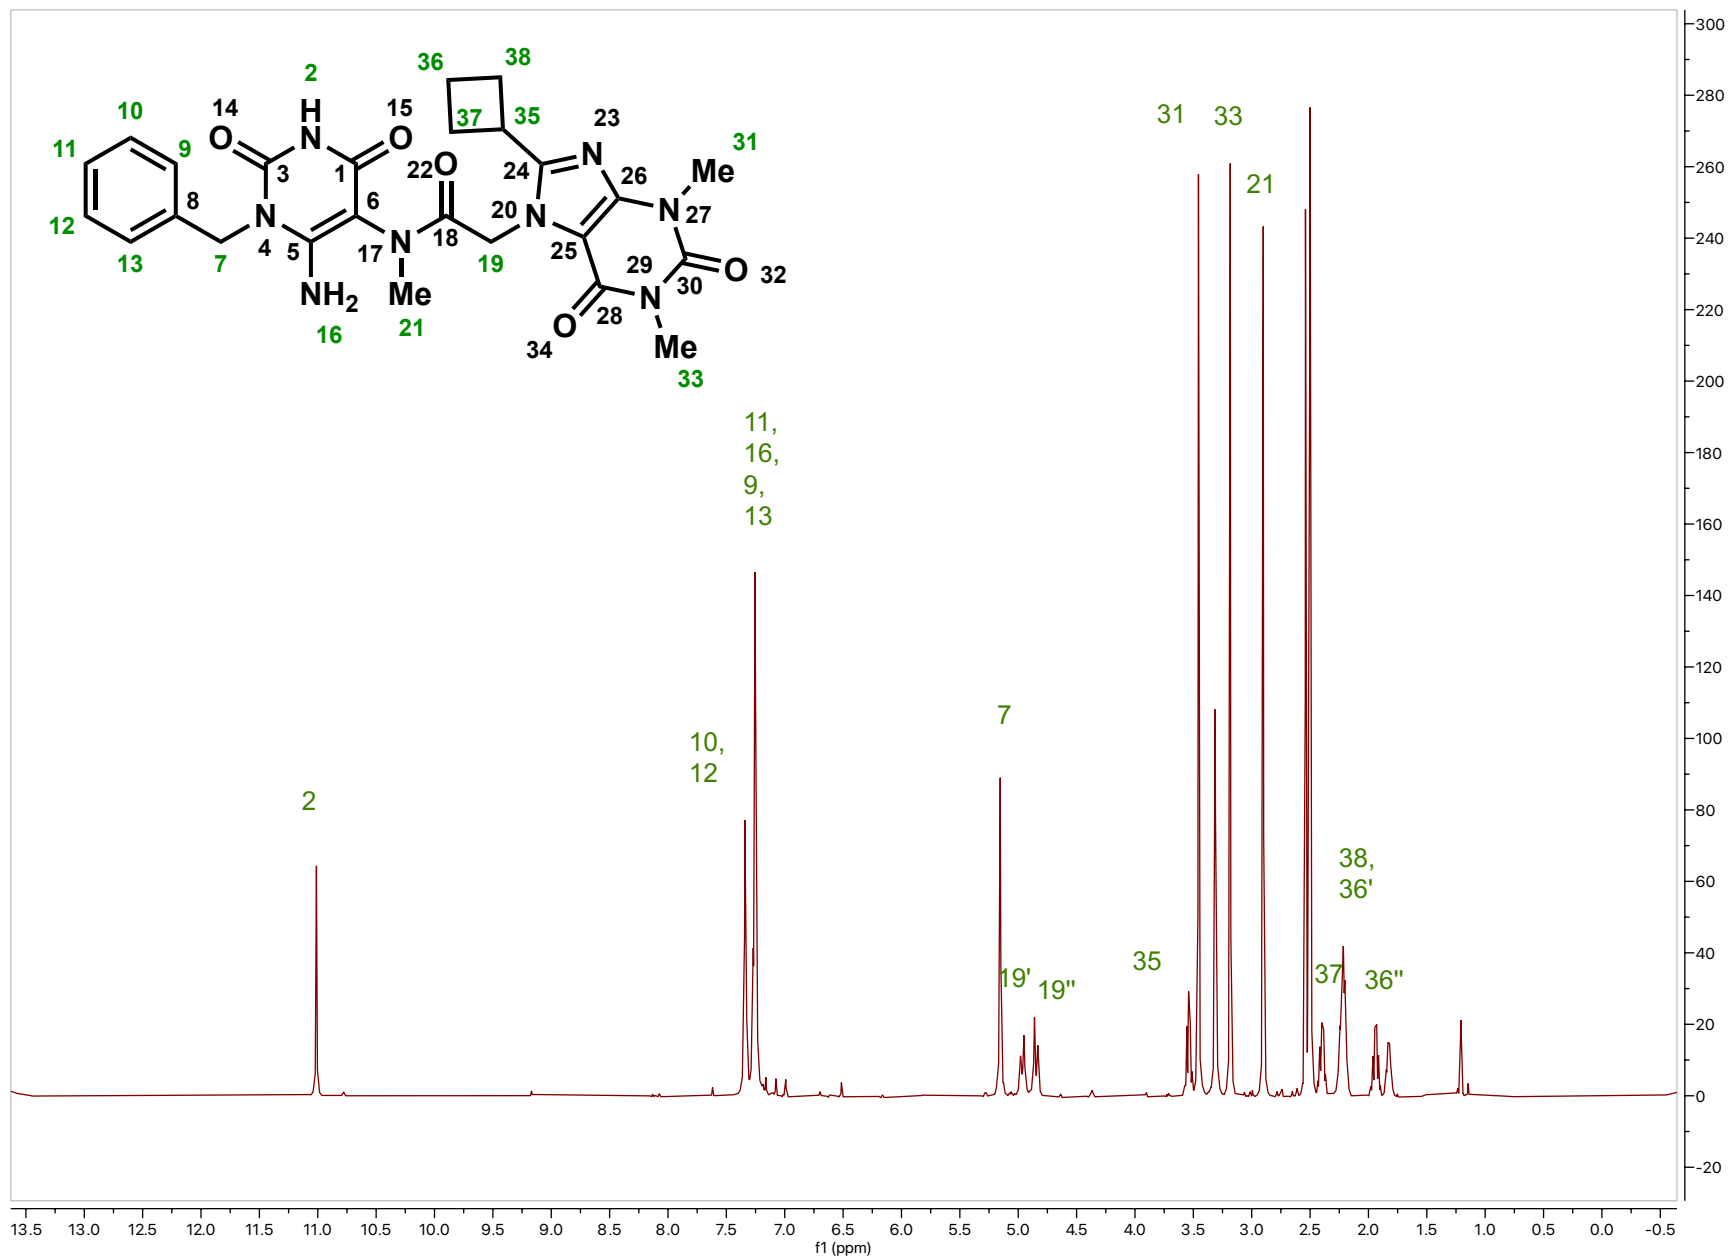

**Figure S33:** 600 MHz <sup>1</sup>H NMR spectrum for compound S24 in DMSO-d<sub>6</sub>. Green numbered atoms are atoms with a potential <sup>1</sup>H NMR signal. Green numbered peaks are mapped to their corresponding atom number.

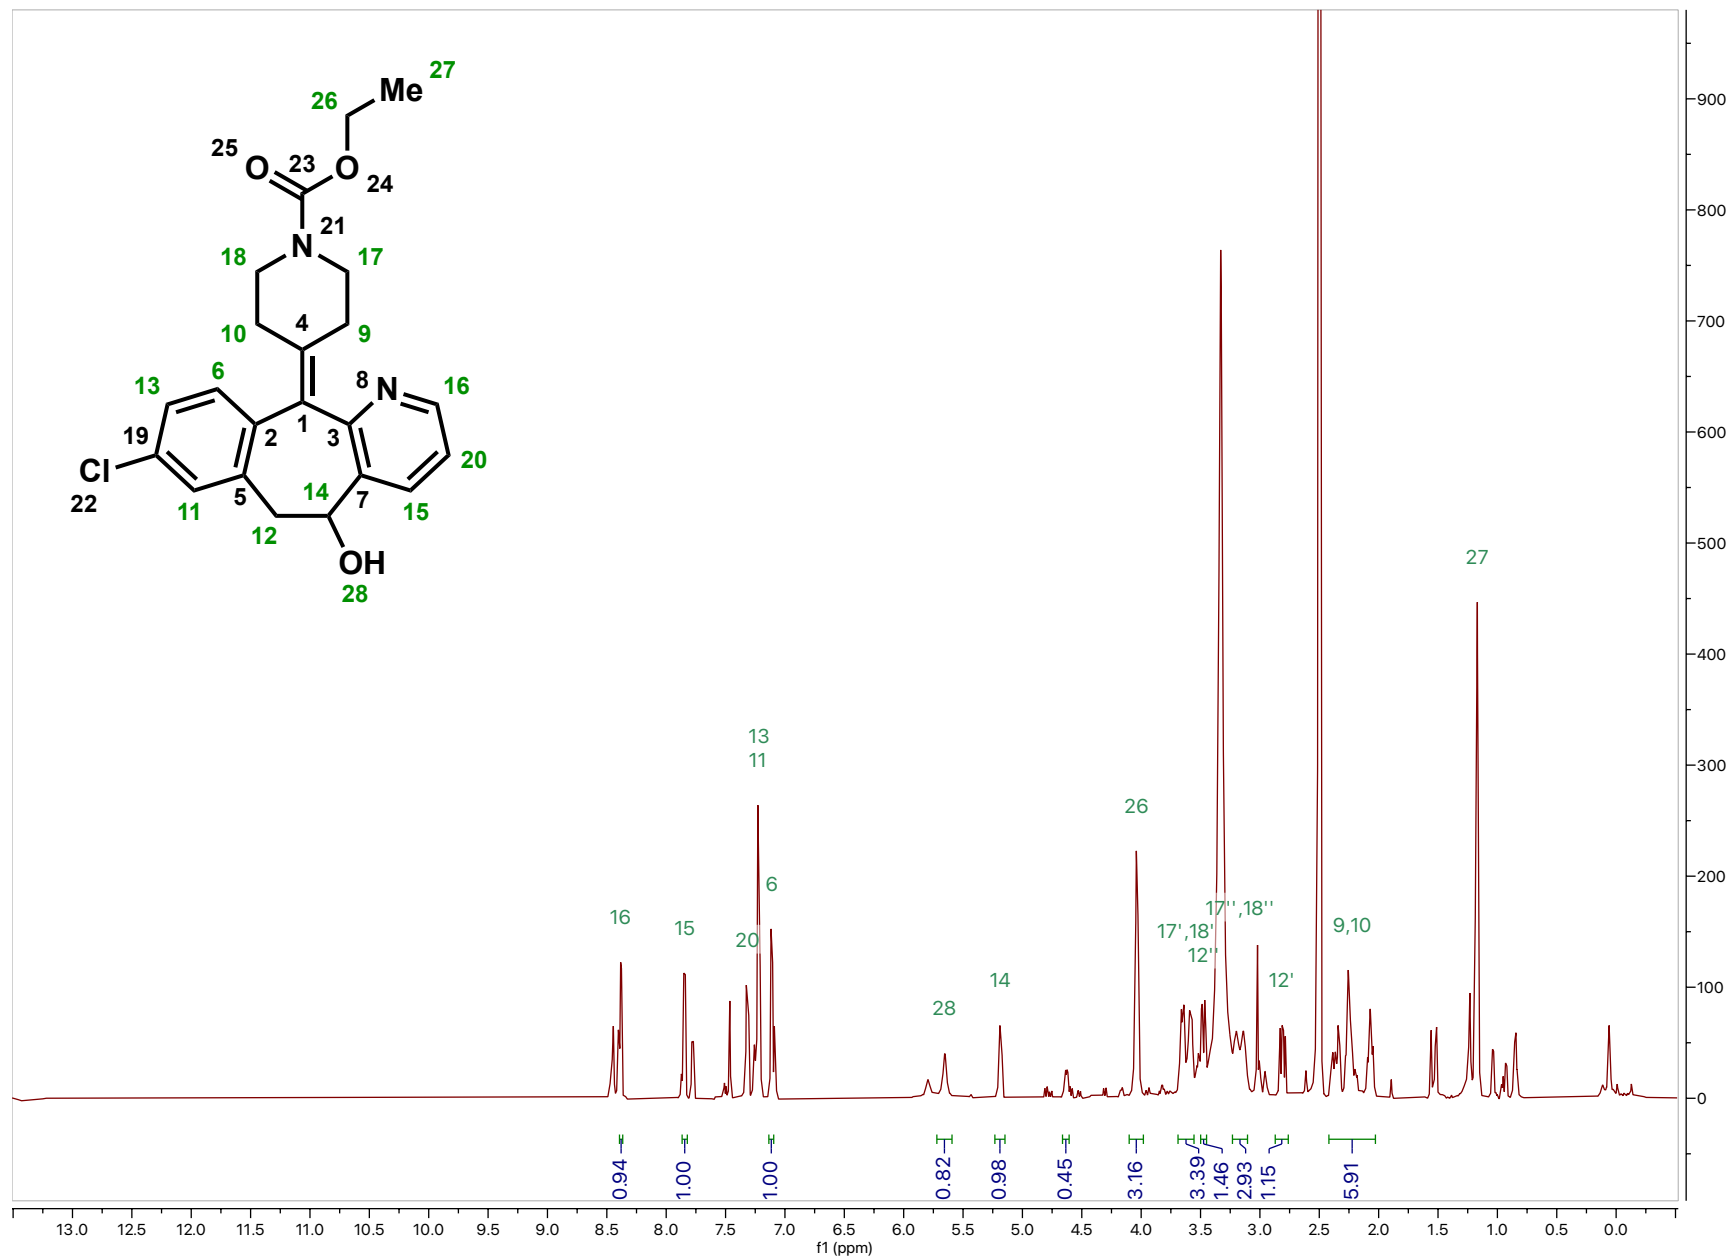

**Figure S34:** 600 MHz <sup>1</sup>H NMR spectrum for compound S25 in DMSO-d<sub>6</sub>. Green numbered atoms are atoms with a potential <sup>1</sup>H NMR signal. Green numbered peaks are mapped to their corresponding atom number.

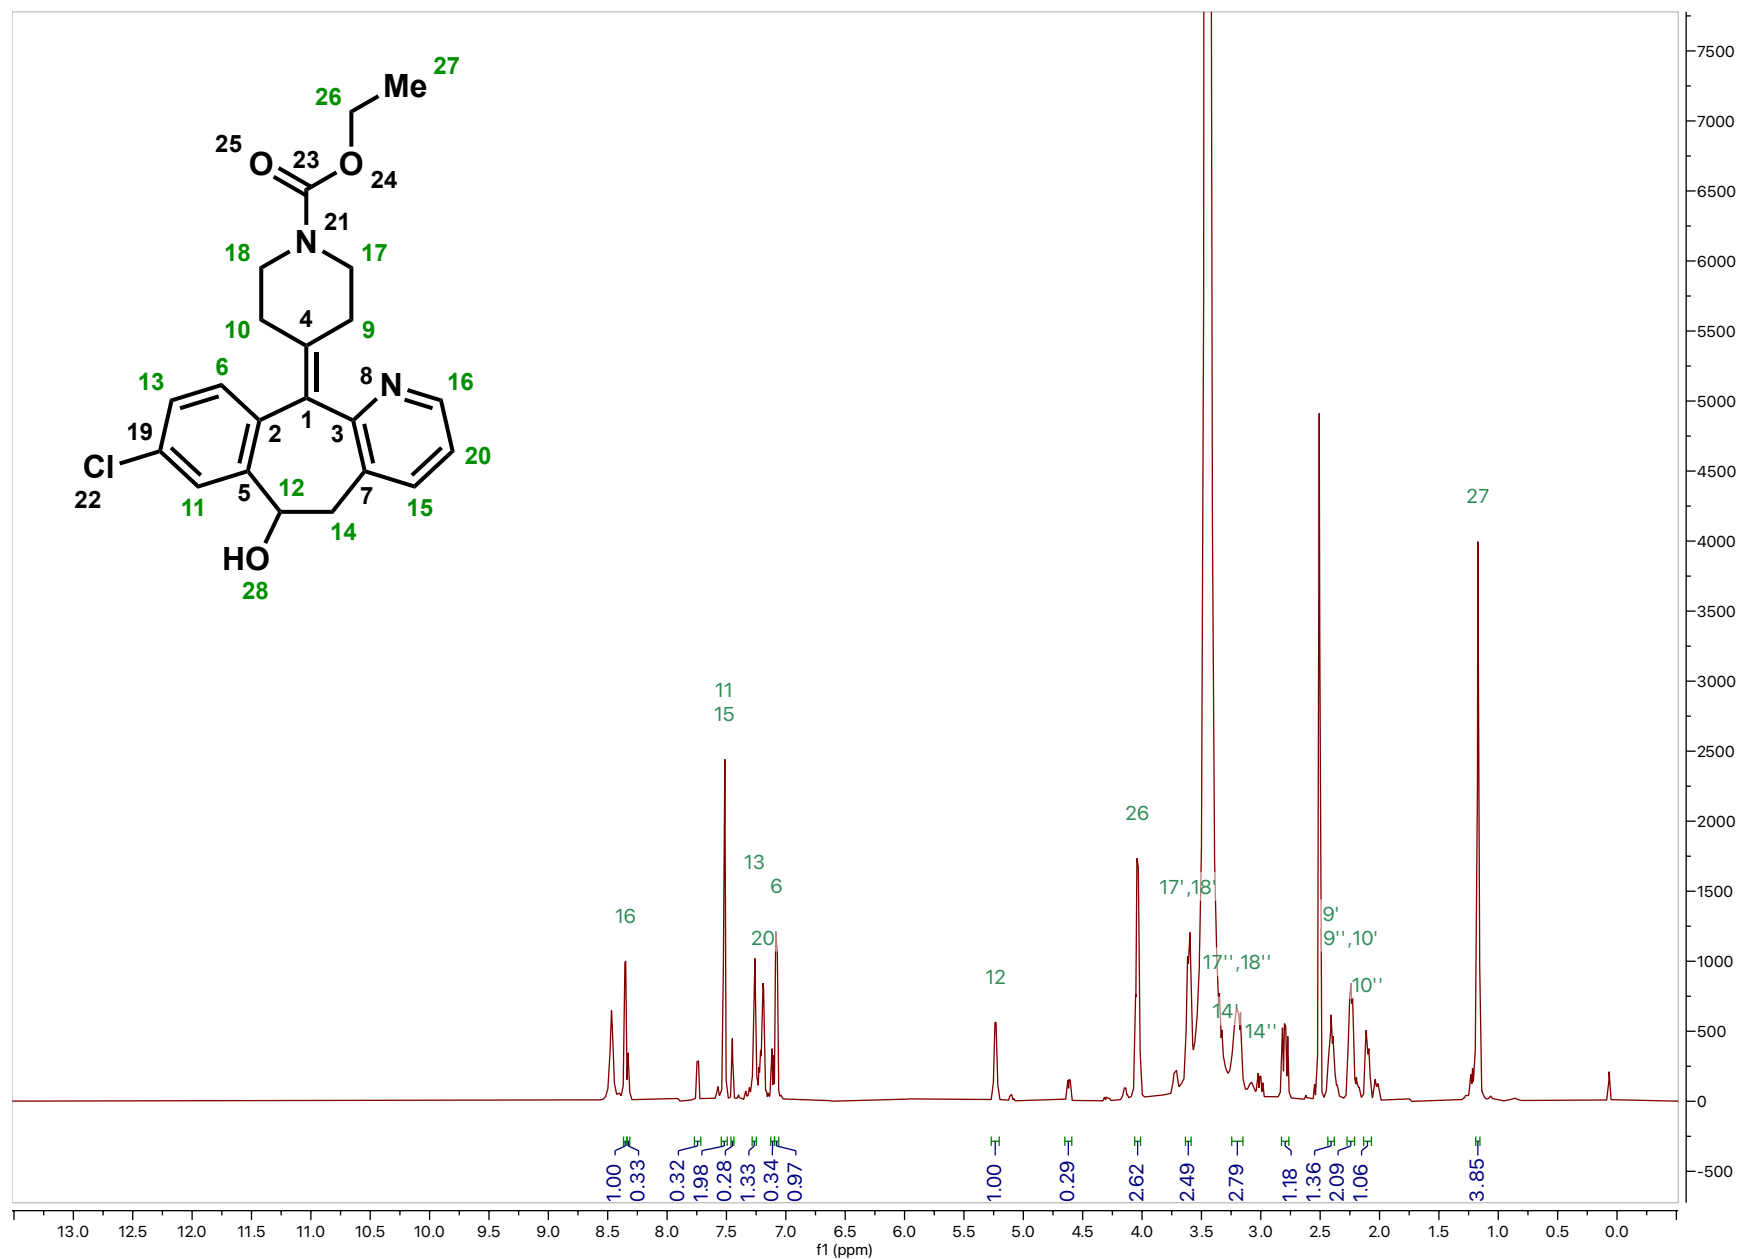

**Figure S35:** 600 MHz  $^1\text{H}$  NMR spectrum for compound S26 in  $\text{DMSO-d}_6$ . Green numbered atoms are atoms with a potential  $^1\text{H}$  NMR signal. Green numbered peaks are mapped to their corresponding atom number.

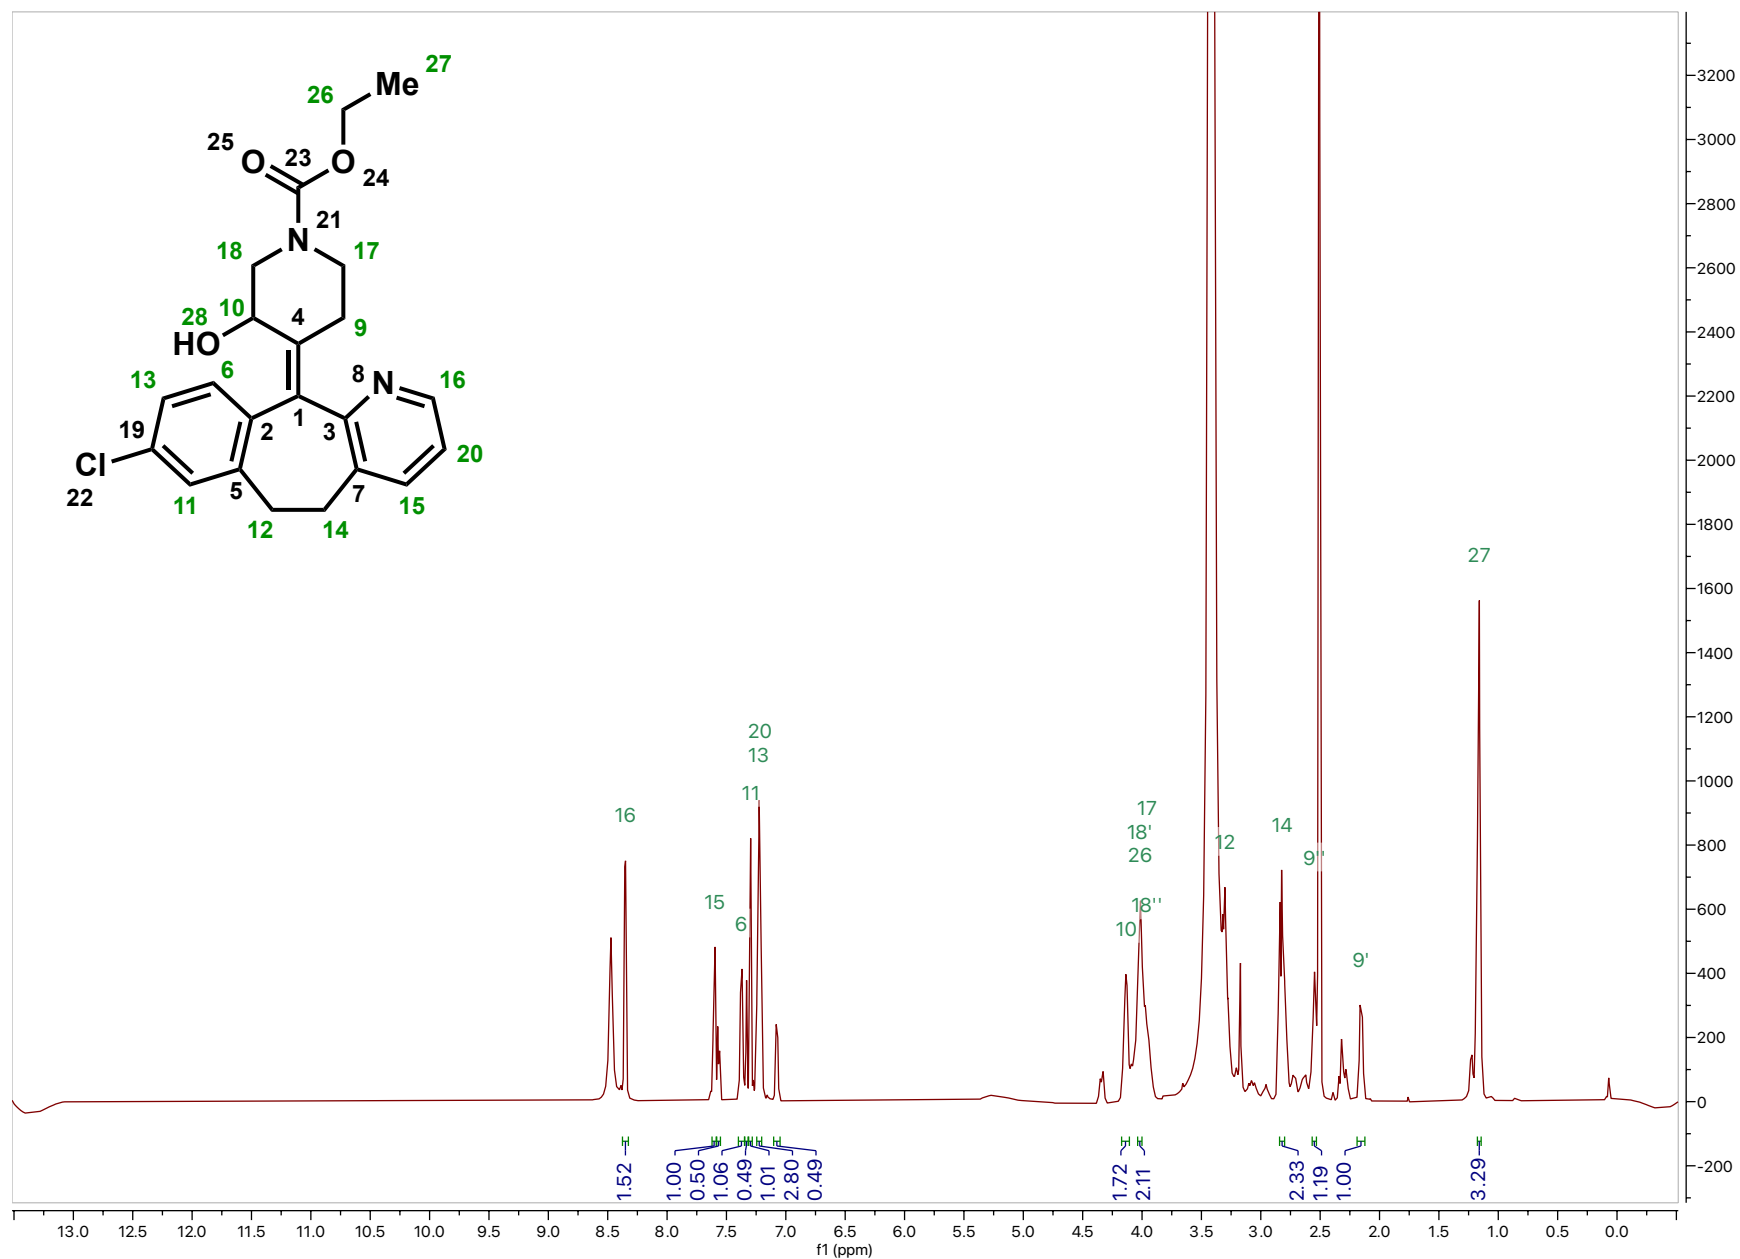

**Figure S36:** 600 MHz <sup>1</sup>H NMR spectrum for compound S27 in DMSO-d<sub>6</sub>. Green numbered atoms are atoms with a potential <sup>1</sup>H NMR signal. Green numbered peaks are mapped to their corresponding atom number.



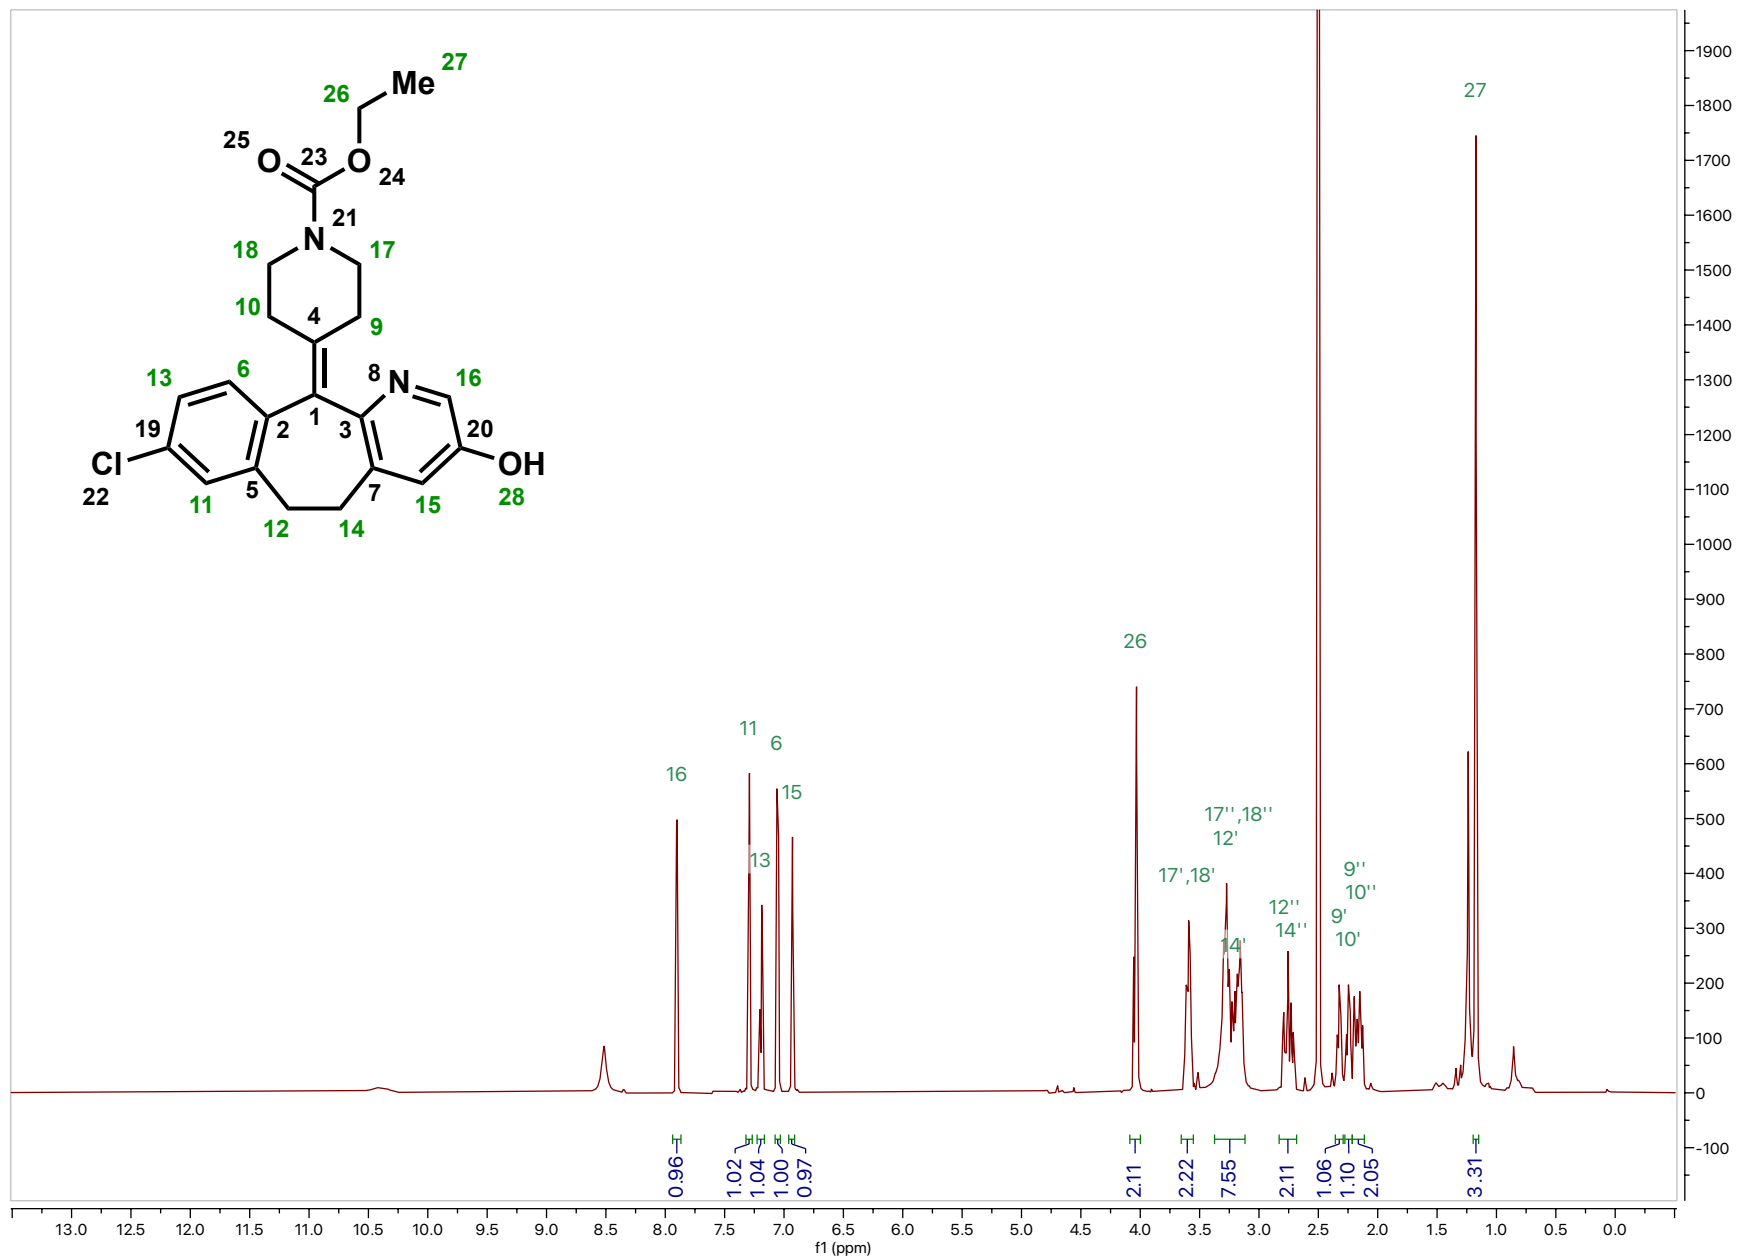

**Figure S37:** 600 MHz <sup>1</sup>H NMR spectrum for compound **S28** in DMSO-d<sub>6</sub>. Green numbered atoms are atoms with a potential <sup>1</sup>H NMR signal. Green numbered peaks are mapped to their corresponding atom number.

### ***Supplementary References:***

- 1 Lall, M. S. *et al.* Late-Stage Lead Diversification Coupled with Quantitative Nuclear Magnetic Resonance Spectroscopy to Identify New Structure–Activity Relationship Vectors at Nanomole-Scale Synthesis: Application to Loratadine, a Human Histamine H1 Receptor Inverse Agonist. *Journal of Medicinal Chemistry* **63**, 7268-7292, doi:10.1021/acs.jmedchem.0c00483 (2020).
- 2 <http://openmopac.net/>.
- 3 Hjorth Larsen, A. *et al.* The atomic simulation environment—a Python library for working with atoms. *Journal of Physics: Condensed Matter* **29**, 273002, doi:10.1088/1361-648X/aa680e (2017).
- 4 Batatia, I., Kovács, D. P., Simm, G. N., Ortner, C. & Csányi, G. Mace: Higher order equivariant message passing neural networks for fast and accurate force fields. *arXiv preprint arXiv:2206.07697* (2022).
- 5 Seritan, S. *et al.* TeraChem: A graphical processing unit-accelerated electronic structure package for large-scale ab initio molecular dynamics. *WIREs Computational Molecular Science* **11**, e1494, doi:<https://doi.org/10.1002/wcms.1494> (2021).
